# Supplementary material for: Preparation of aromatic γ-hydroxyketones by means of Heck coupling of aryl halides and 2,3-dihydrofuran, catalyzed by a palladium(ii) glycine complex under microwave irradiation
Source: Royal Society of Chemistry journal article supplement (doi:10.1039/d0nj02630a), 2020-01-01
Supplement: d0nj02630a1.pdf [file d0nj02630a1.pdf]

# Preparation of aromatic $\gamma$ -hydroxyketones by means of Heck coupling of aryl halides and 2,3-dihydrofuran, catalyzed by palladium(II) glycine complex under microwave irradiation

Juan C. Jiménez-Cruz,<sup>a</sup> Ramón Guzmán-Mejía,<sup>a</sup> Eusebio Juaristi,<sup>b,c</sup> \* Omar Sánchez-Antonio,<sup>b</sup> Marco A. García-Revilla,<sup>d</sup> \* J. Betzabe González-Campos,<sup>a</sup> Judit Aviña-Verduzco<sup>a</sup> \*

<sup>a</sup> Instituto de Investigaciones Químico Biológicas. Universidad Michoacana de San Nicolás de Hidalgo. Edificio B-1, planta baja Ciudad Universitaria, 58030 Morelia, Michoacán

<sup>b</sup> Departamento de Química, Centro de Investigación y de Estudios Avanzados, Avenida Instituto Politécnico Nacional # 2508, 07360 Ciudad de México, México

<sup>c</sup> El Colegio Nacional, Donceles No. 104, Centro Histórico, 06020 Ciudad de México, México

<sup>d</sup> Departamento de Química, Universidad de Guanajuato, Noria Alta s/n, 36050 Guanajuato, Gto, México

Electronic Supplementary Material (ESI) for New Journal of Chemistry

## SUPPORTING INFORMATION

### TABLE OF CONTENTS

|    |                                                                                            |     |
|----|--------------------------------------------------------------------------------------------|-----|
| 1. | NMR spectra.....                                                                           | S2  |
| 2. | Crystal data and X-ray crystallographic structure of compounds <b>1</b> and <b>5</b> ..... | S20 |
| 3. | Figures and Coordinates of structures of minima along the Catalytic Cycle .....            | S23 |

## 1. NMR spectra

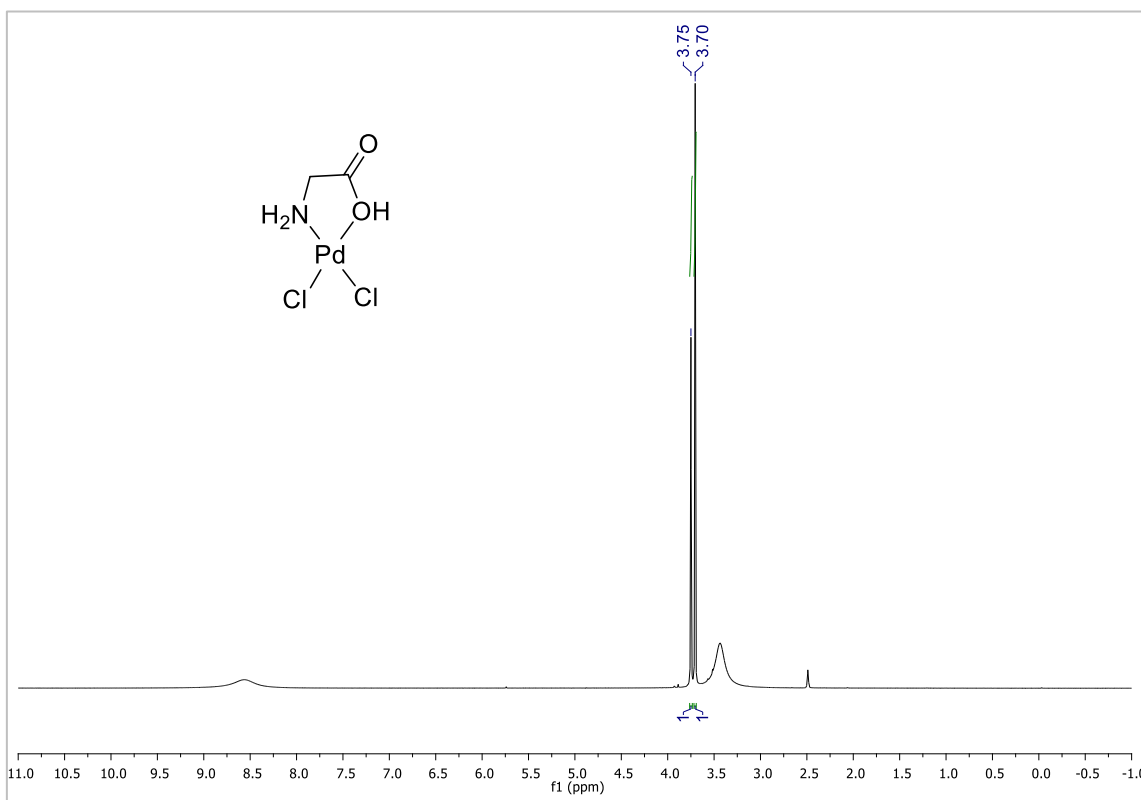

<sup>1</sup>H NMR spectrum of catalyst 1 (400 MHz, DMSO-*d*<sub>6</sub>).

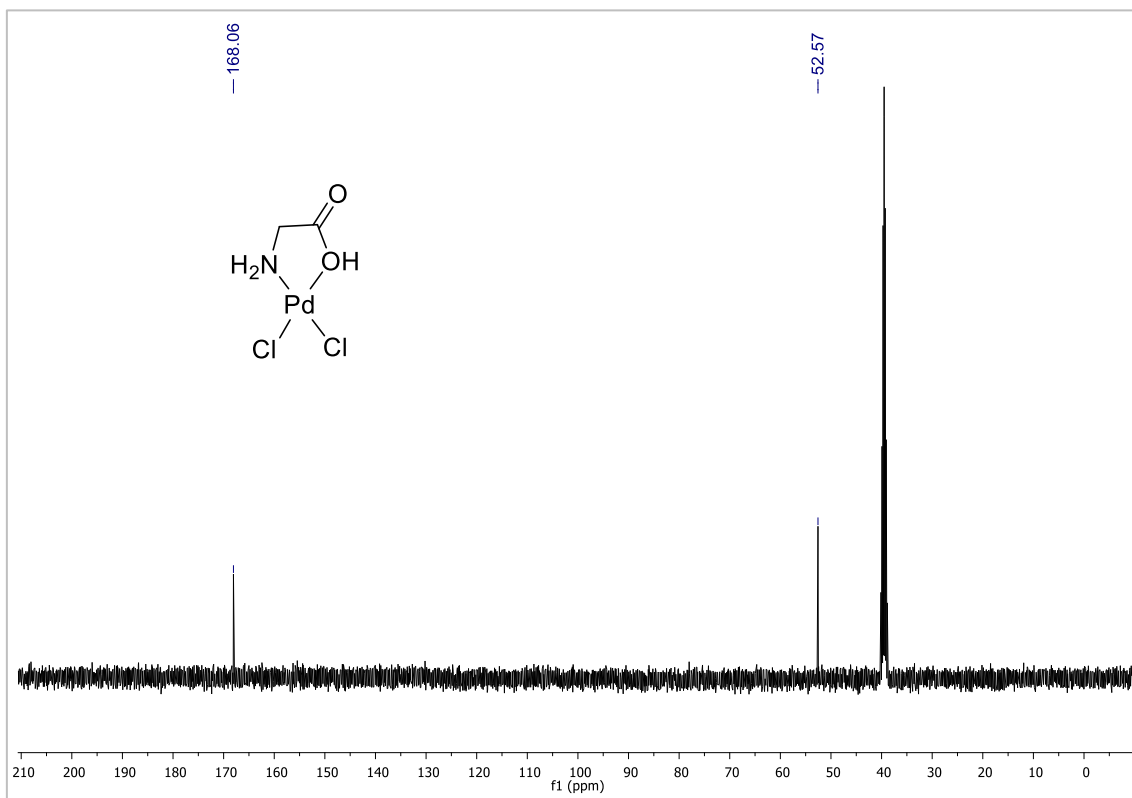

<sup>13</sup>C NMR spectrum of catalyst 1 (100 MHz, DMSO-*d*<sub>6</sub>).

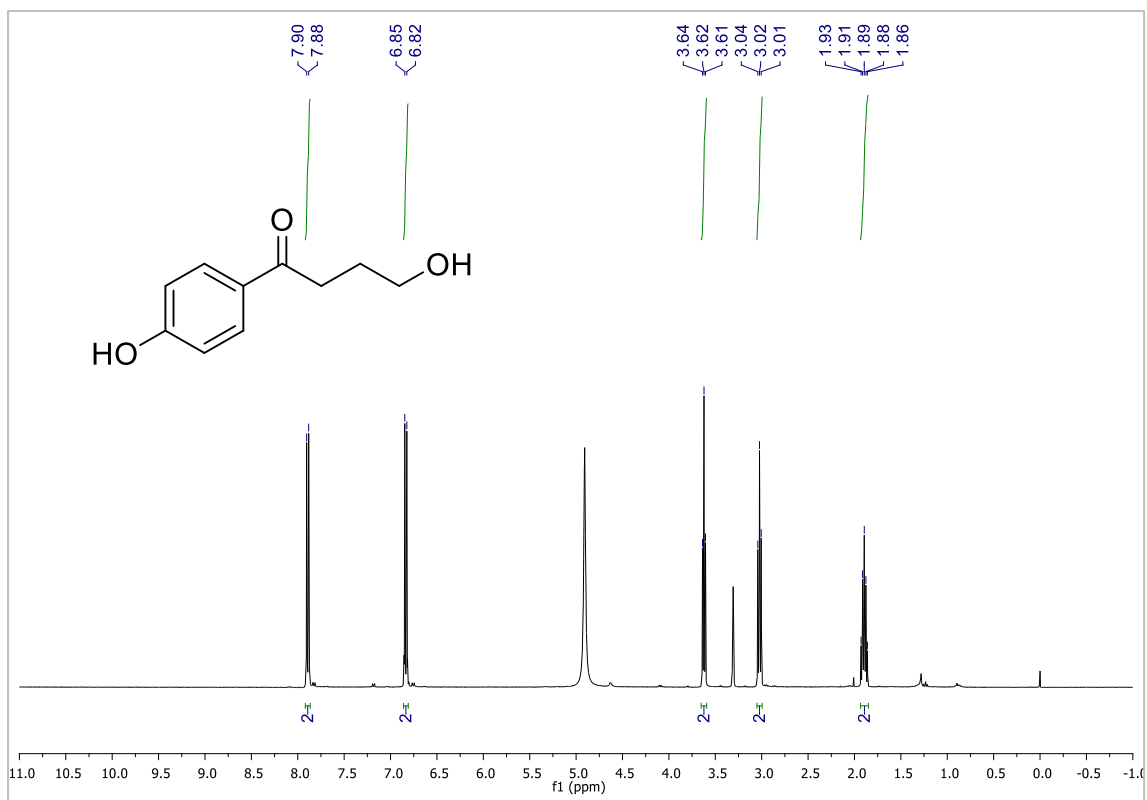

$^1\text{H}$  NMR spectrum of 2 (400 MHz,  $\text{CD}_3\text{OD}$ ).

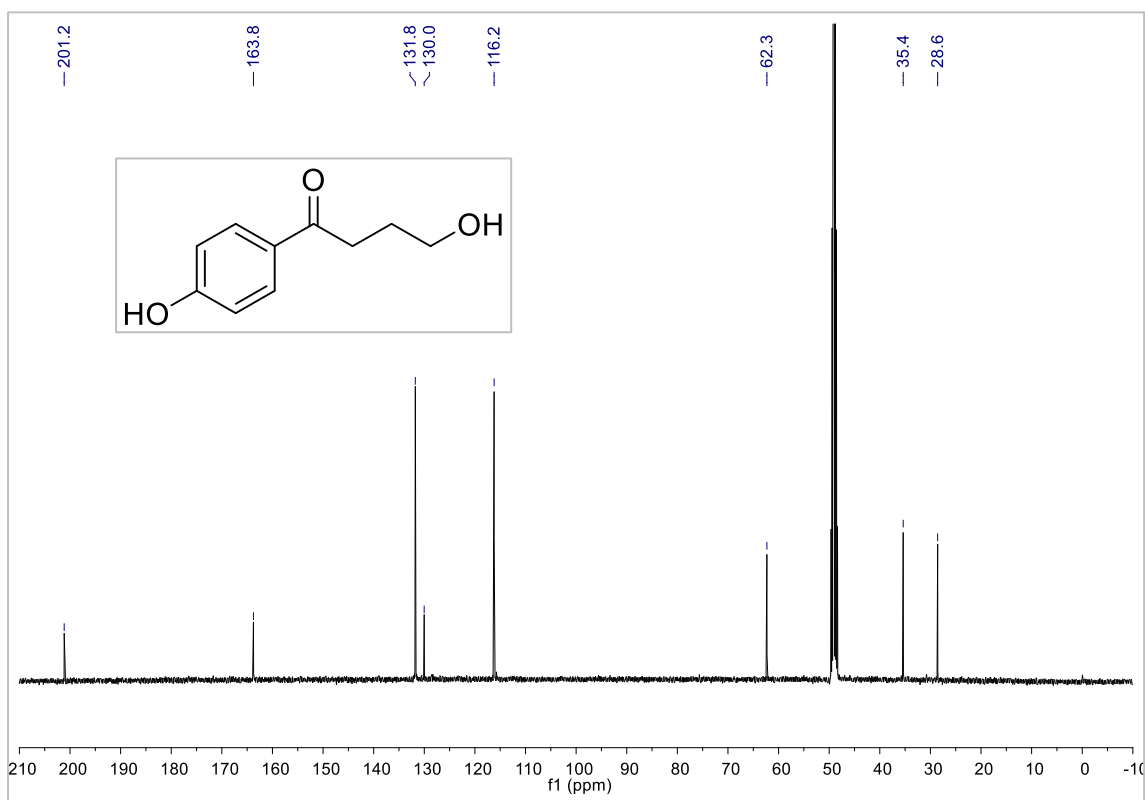

$^{13}\text{C}$  NMR spectrum of 2 (100 MHz,  $\text{CD}_3\text{OD}$ ).

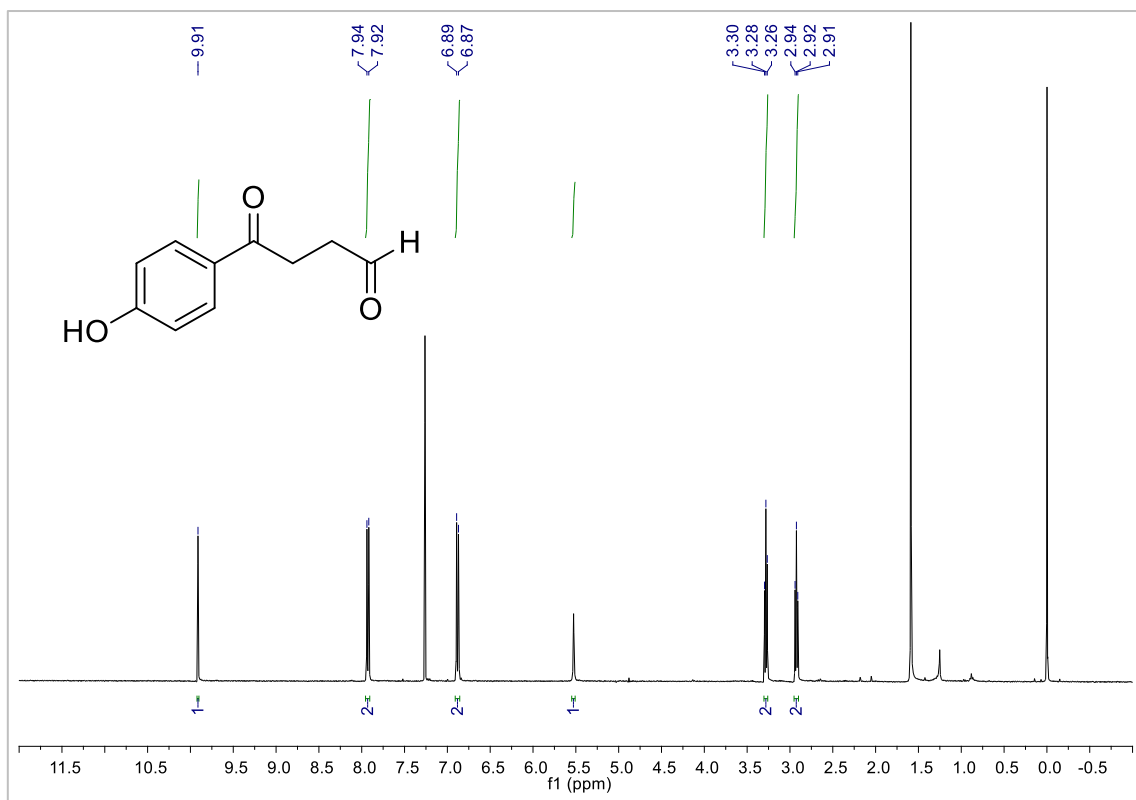

<sup>1</sup>H NMR spectrum of **3** (400 MHz, CDCl<sub>3</sub>).

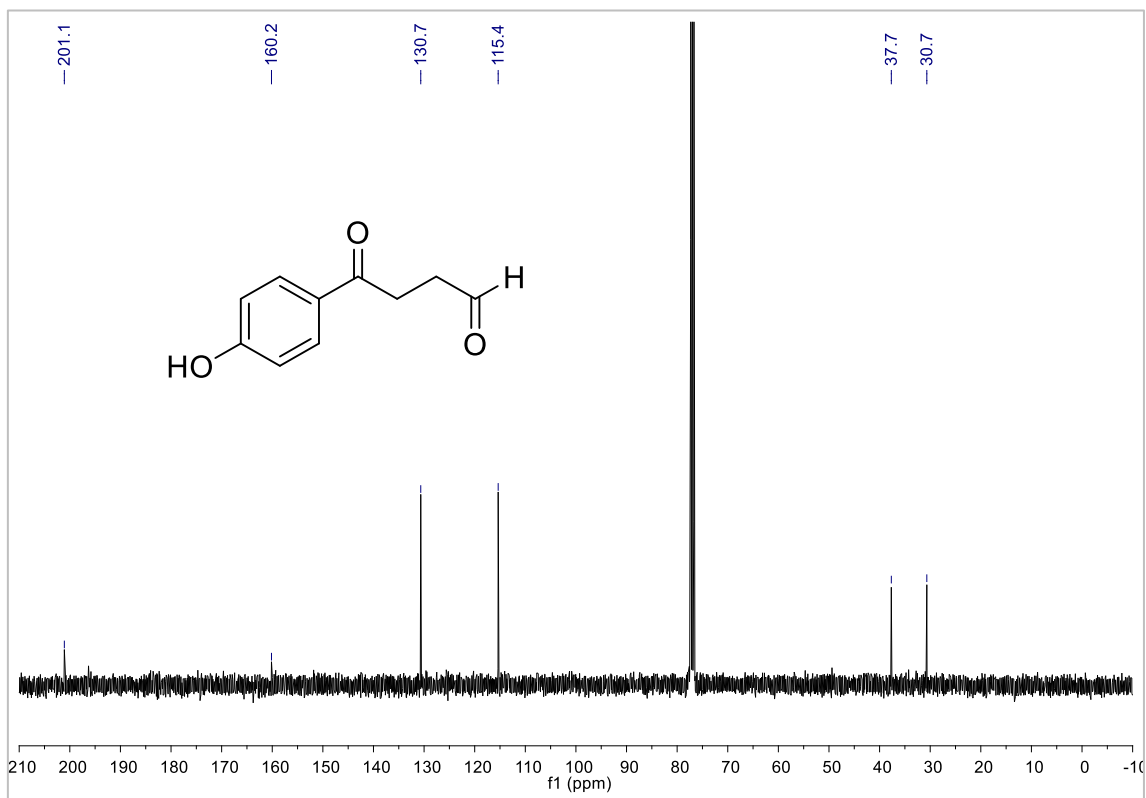

<sup>13</sup>C NMR spectrum of **3** (100 MHz, CDCl<sub>3</sub>).

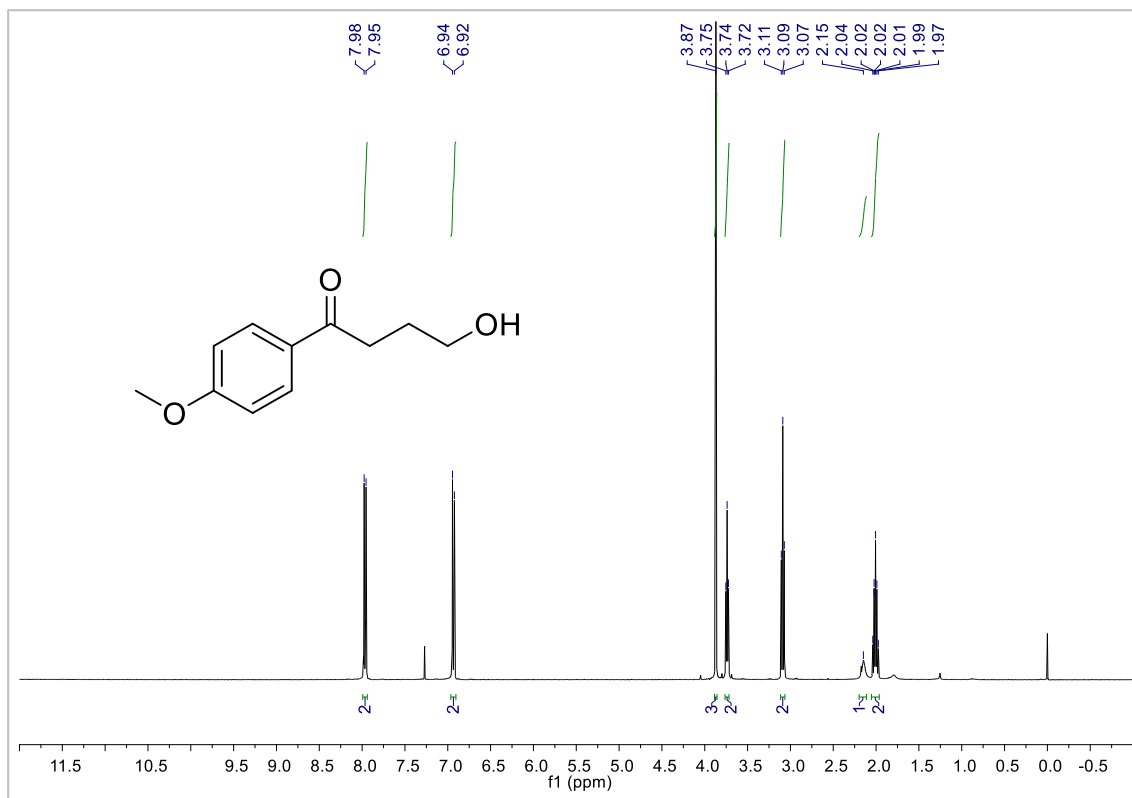

$^1\text{H}$  NMR spectrum of **4** (400 MHz,  $\text{CDCl}_3$ ).

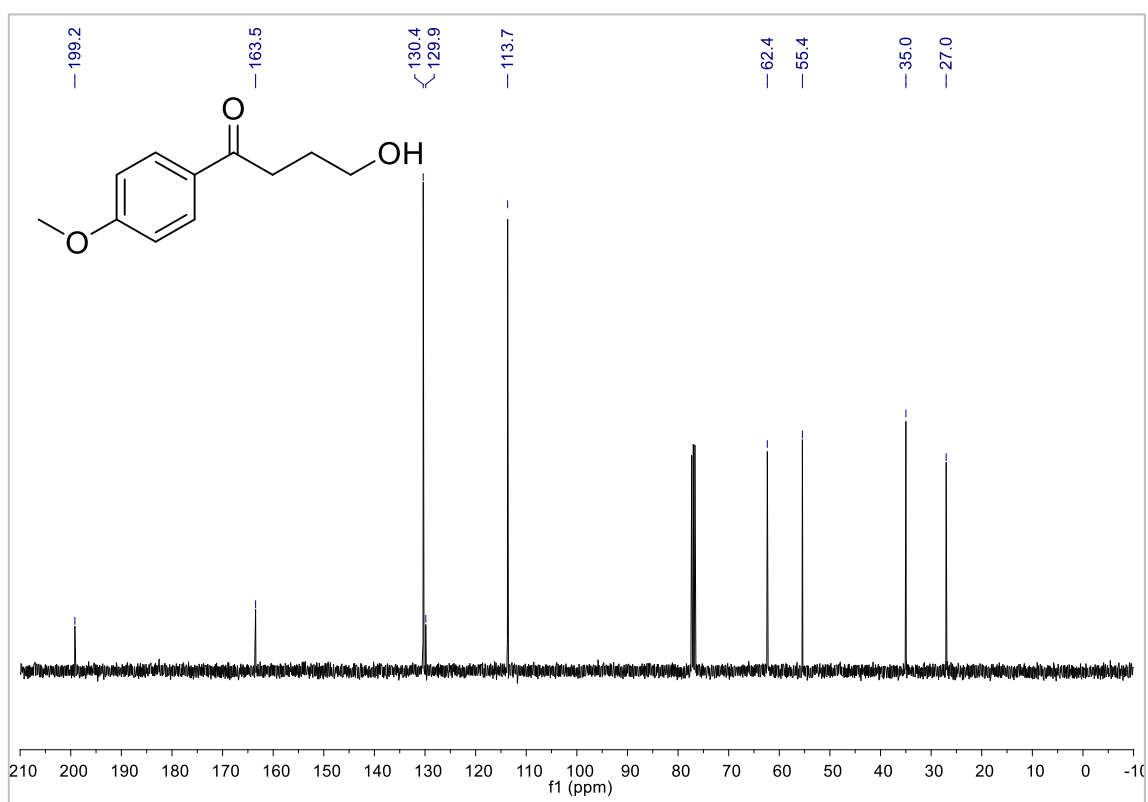

$^{13}\text{C}$  NMR spectrum of **4** (100 MHz,  $\text{CDCl}_3$ ).

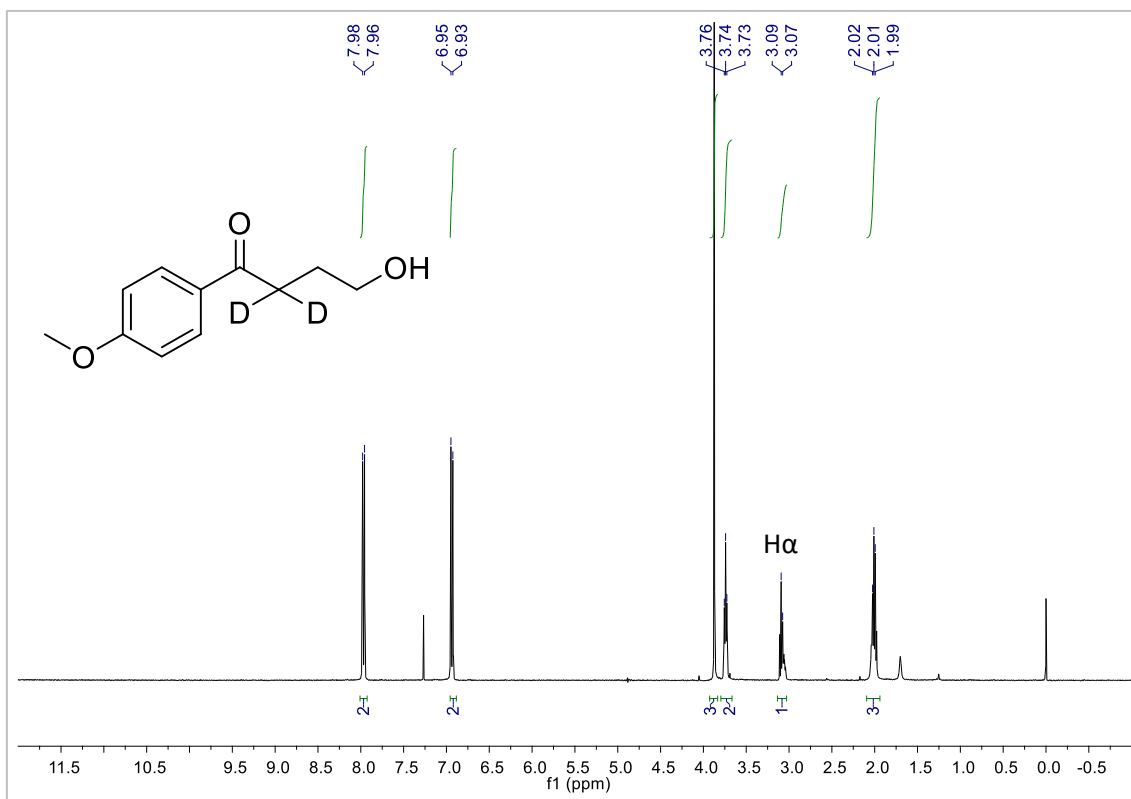

<sup>1</sup>H NMR spectrum of **4-d<sub>2</sub>** (400 MHz, CDCl<sub>3</sub>).

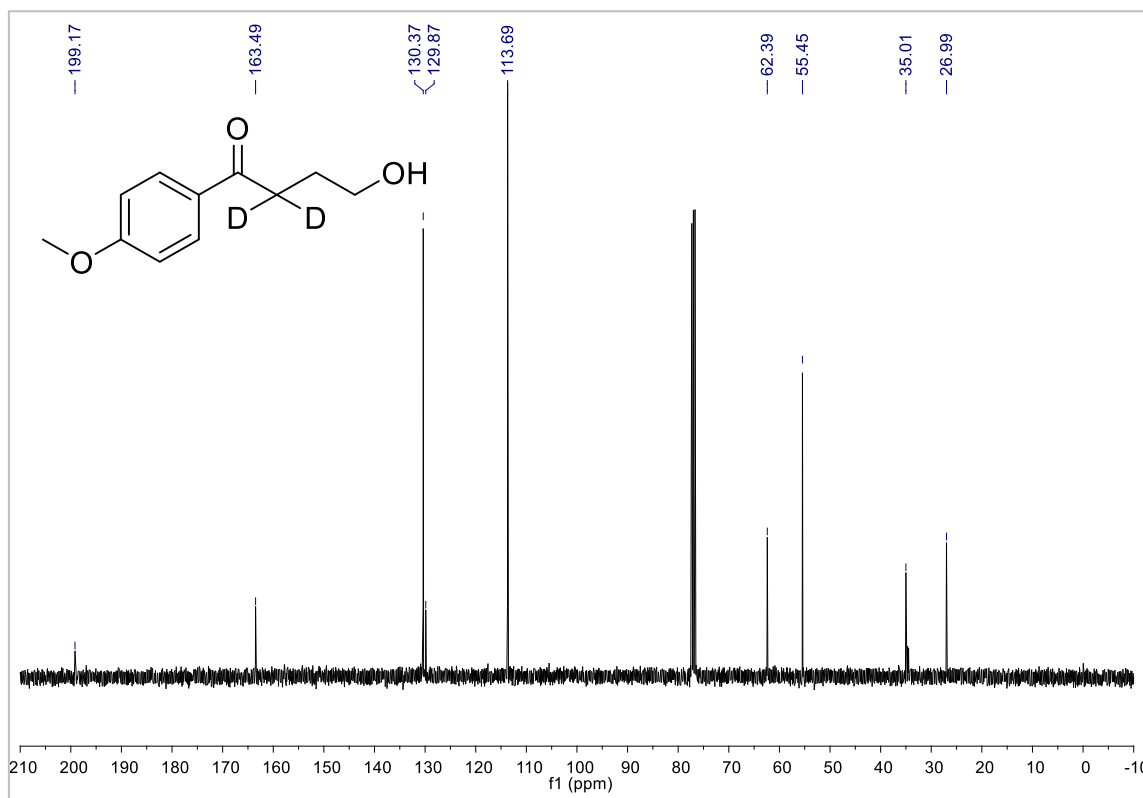

<sup>13</sup>C NMR spectrum of **4-d<sub>2</sub>** (100 MHz, CDCl<sub>3</sub>).

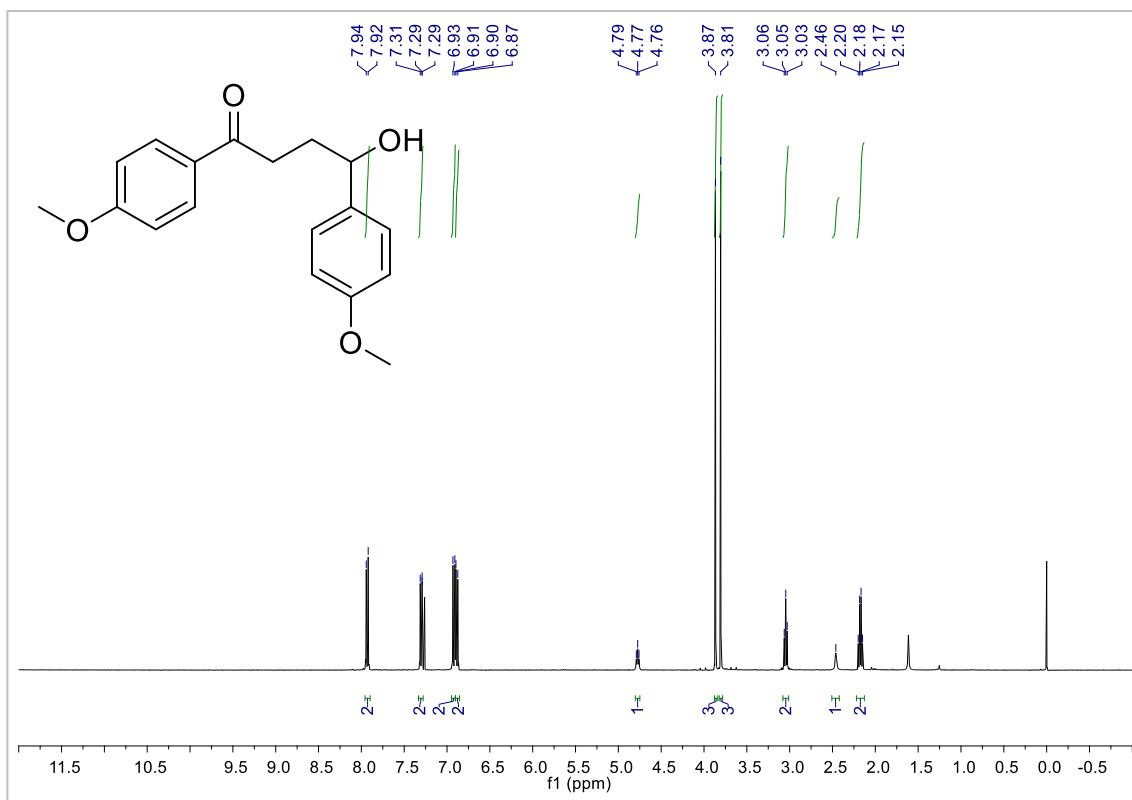

<sup>1</sup>H NMR spectrum of 5 (400 MHz, CDCl<sub>3</sub>).

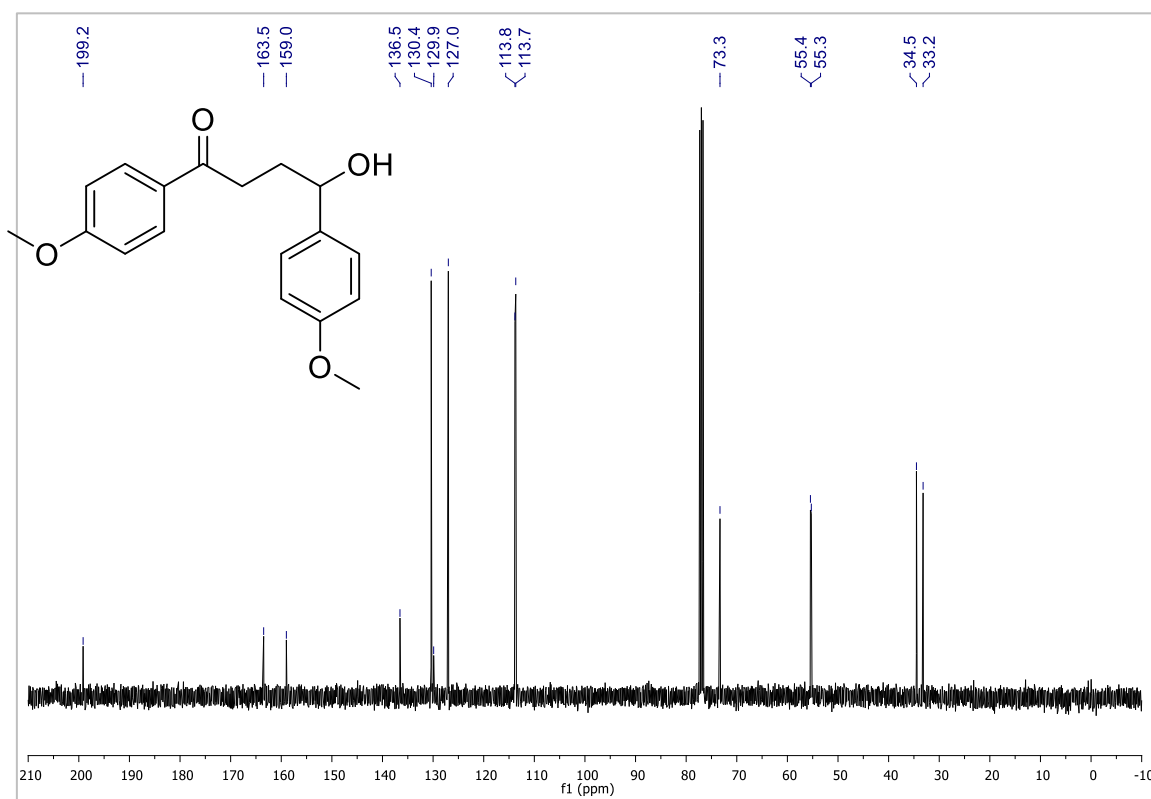

<sup>13</sup>C NMR spectrum of 5 (100 MHz, CDCl<sub>3</sub>).

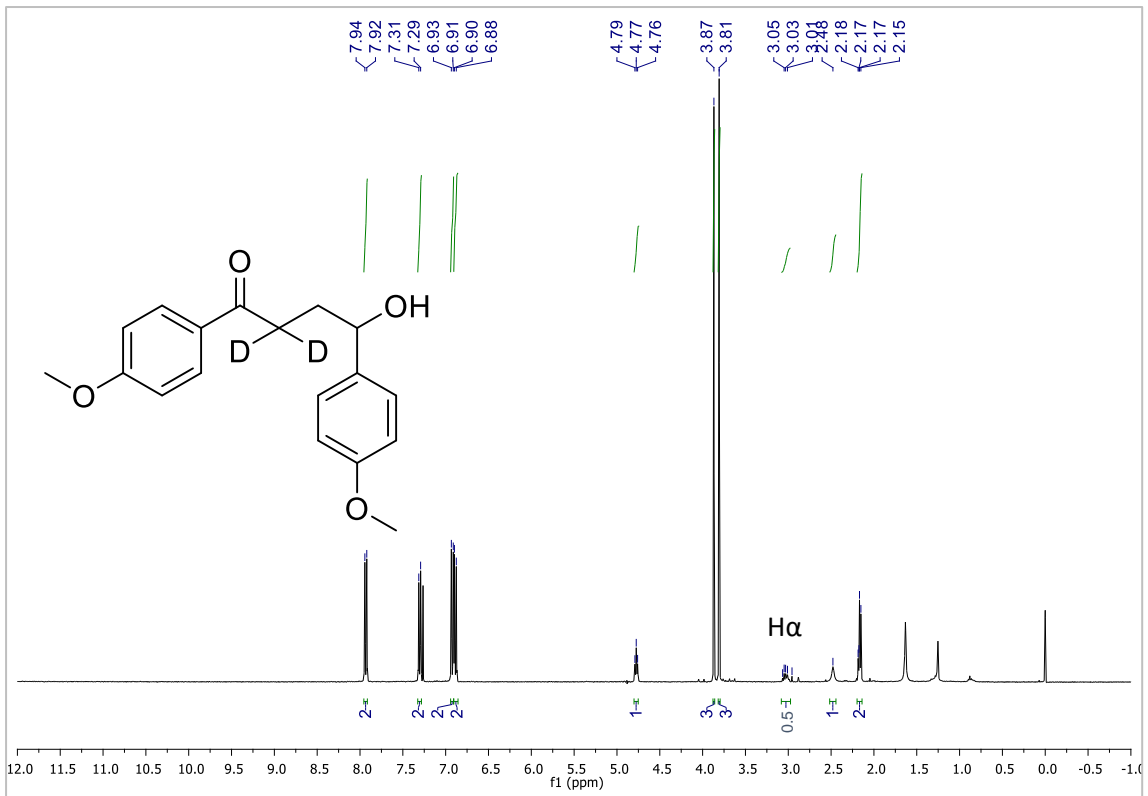

<sup>1</sup>H NMR spectrum of 5-d<sub>2</sub> (400 MHz, CDCl<sub>3</sub>)

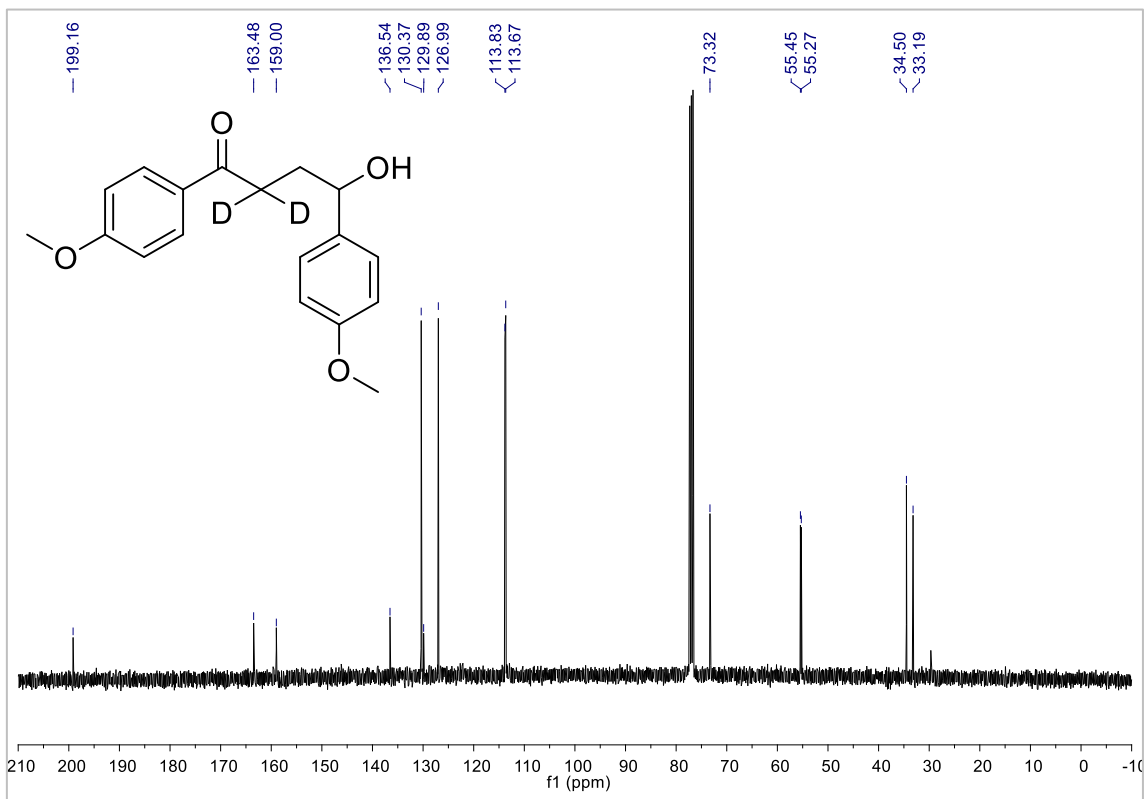

<sup>13</sup>C NMR spectrum of 5-d<sub>2</sub> (100 MHz, CDCl<sub>3</sub>).



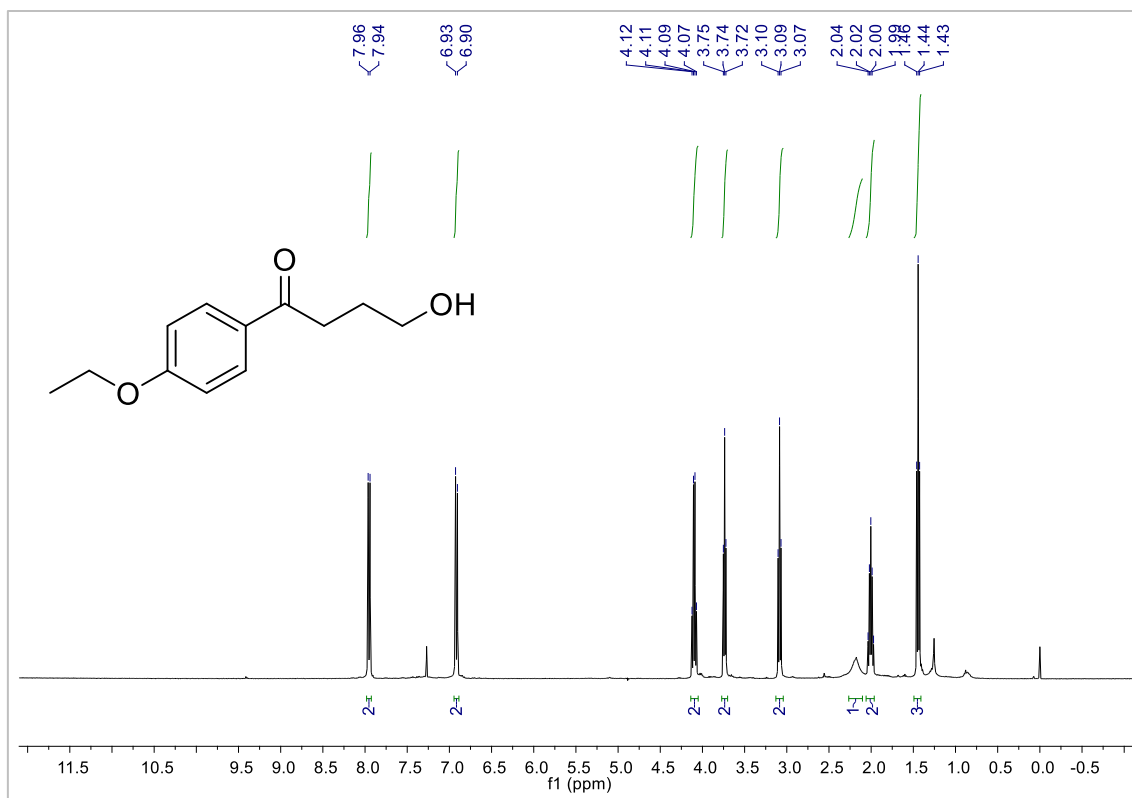

<sup>1</sup>H NMR spectrum of **6** (400 MHz, CDCl<sub>3</sub>).

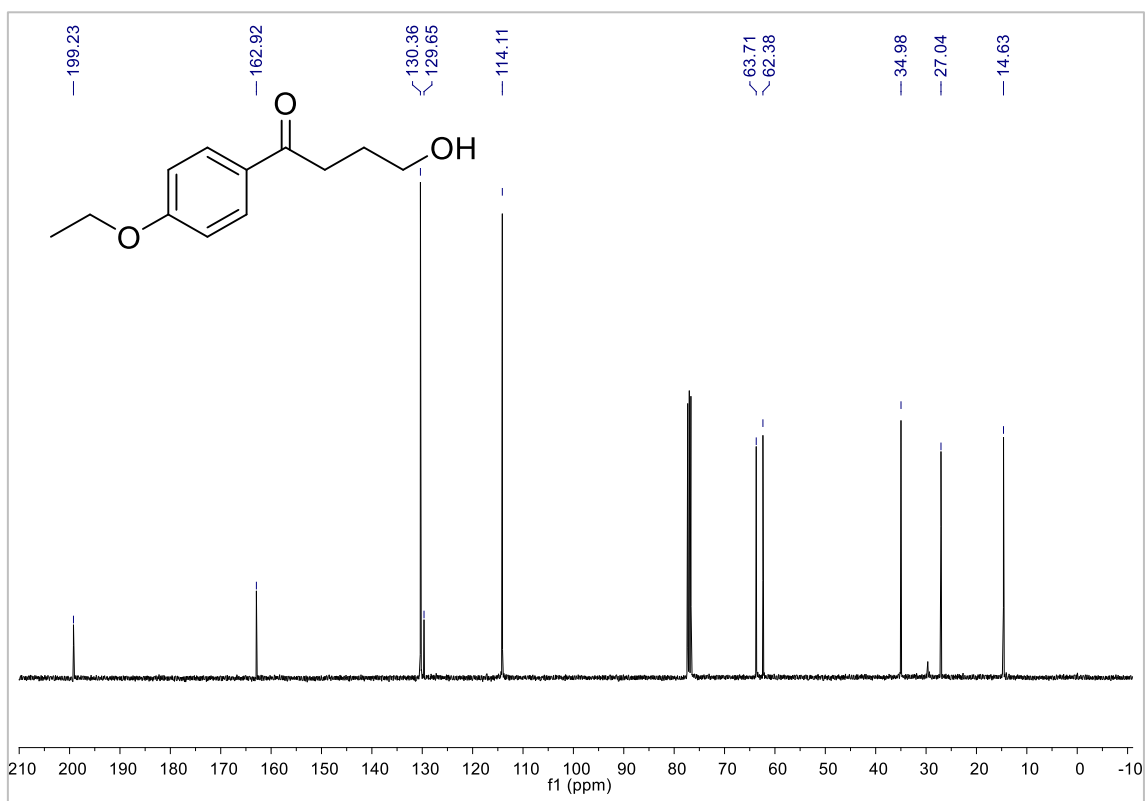

<sup>13</sup>C NMR spectrum of **6** (100 MHz, CDCl<sub>3</sub>).

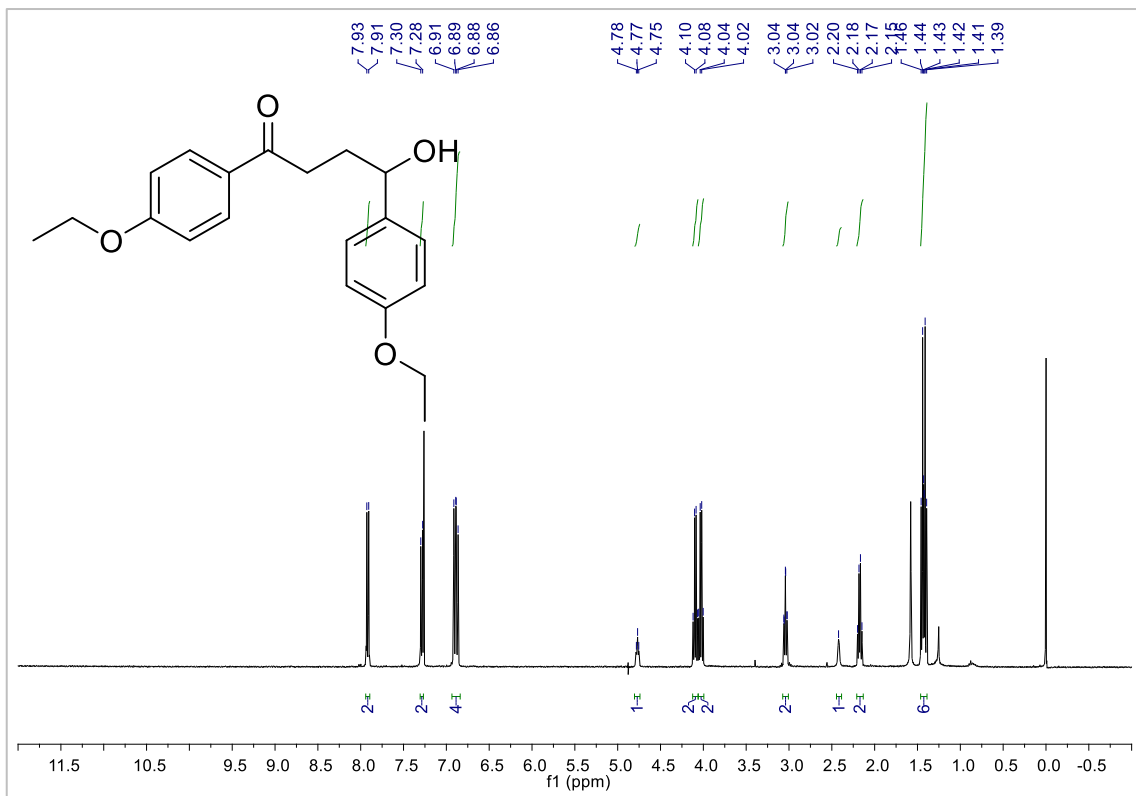

<sup>1</sup>H NMR spectrum of 7 (400 MHz, CDCl<sub>3</sub>).

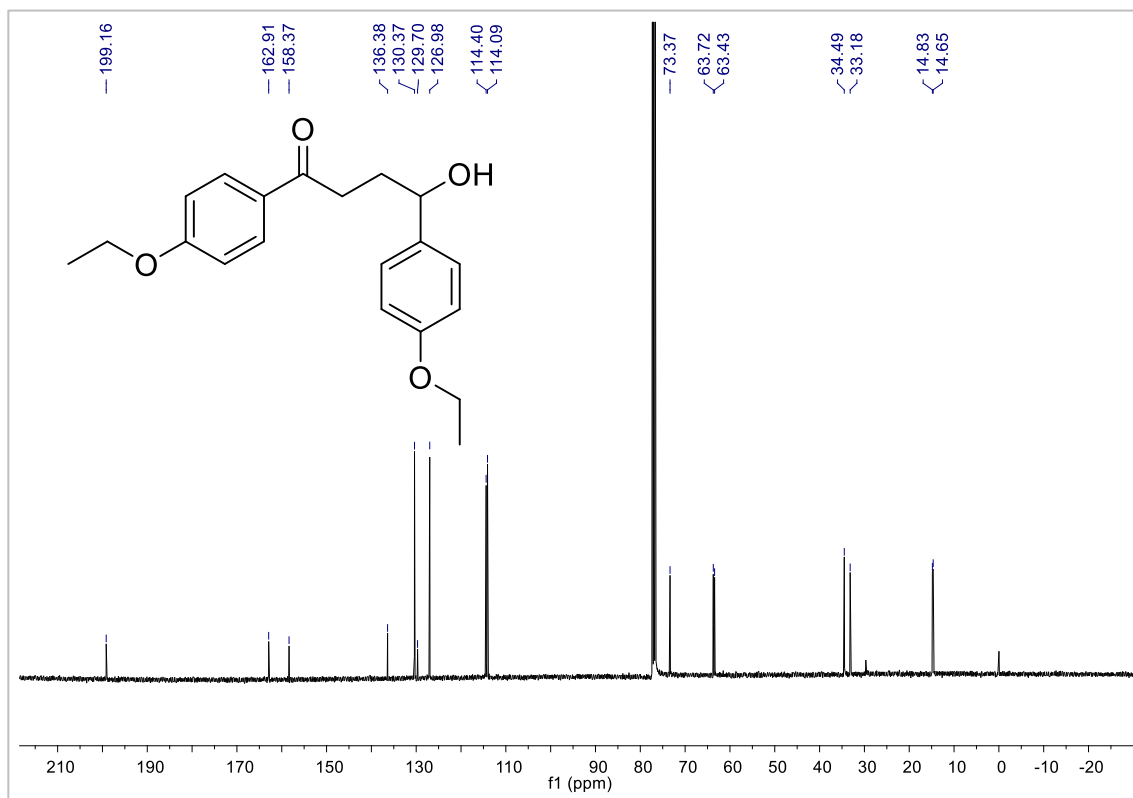

<sup>13</sup>C NMR spectrum of 7 (100 MHz, CDCl<sub>3</sub>).

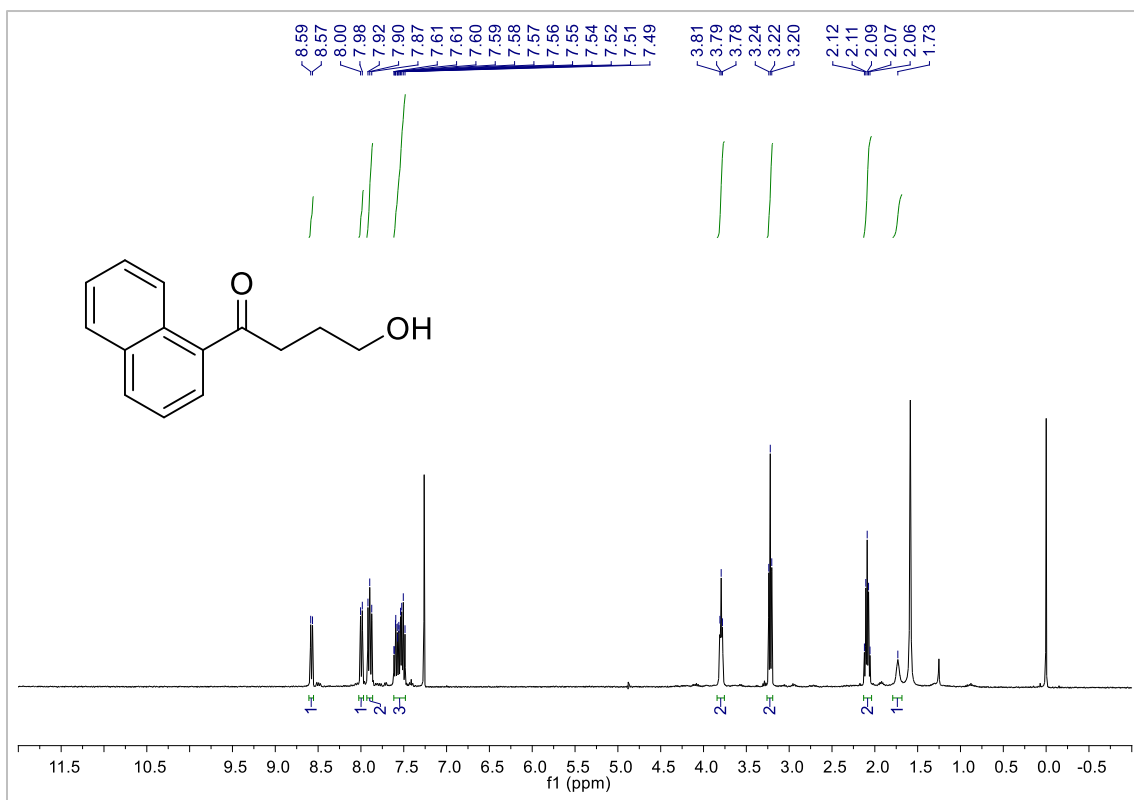

$^1\text{H}$  NMR spectrum of **8** (400 MHz,  $\text{CDCl}_3$ ).

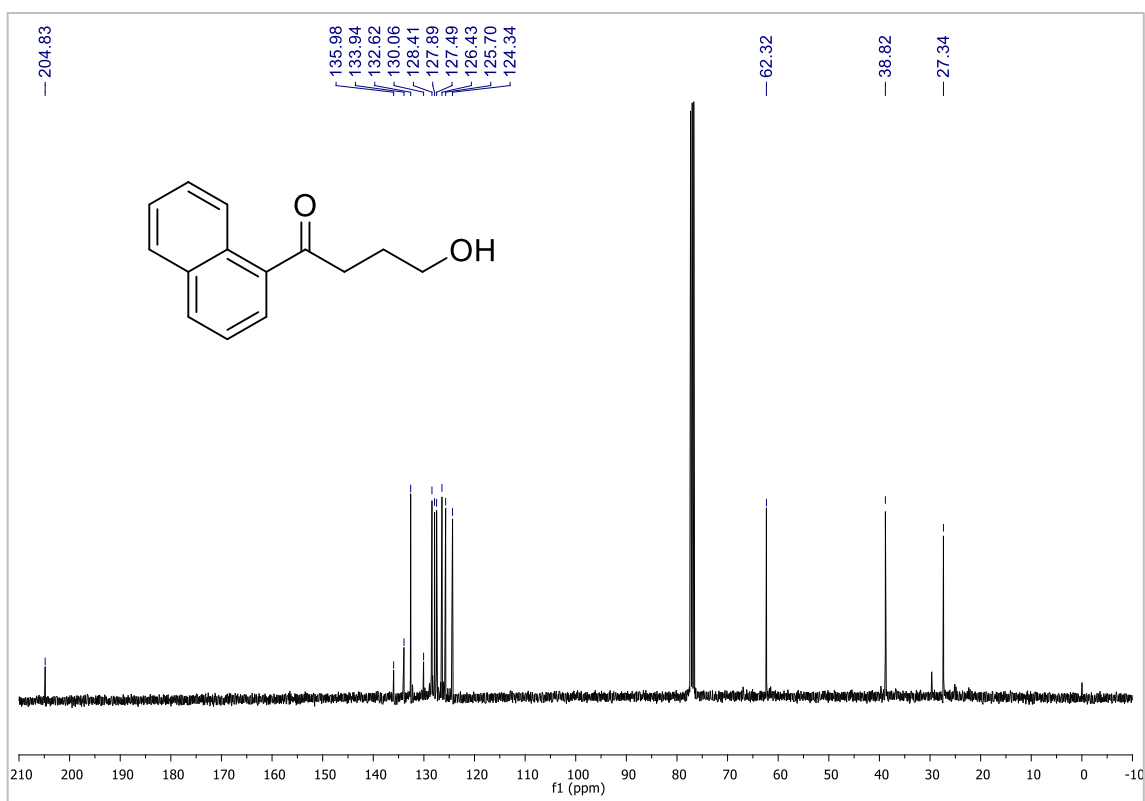

$^{13}\text{C}$  NMR spectrum of **8** (100 MHz,  $\text{CDCl}_3$ ).

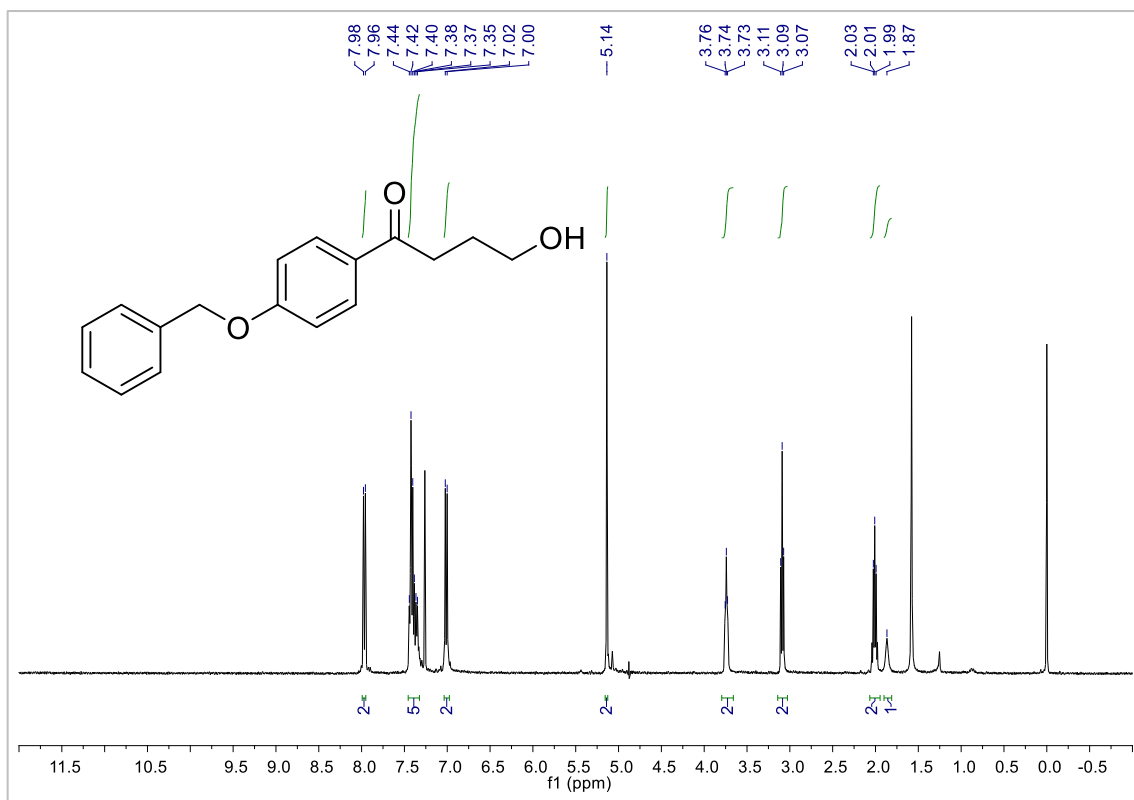

$^1\text{H}$  NMR spectrum of **9** (400 MHz,  $\text{CDCl}_3$ ).

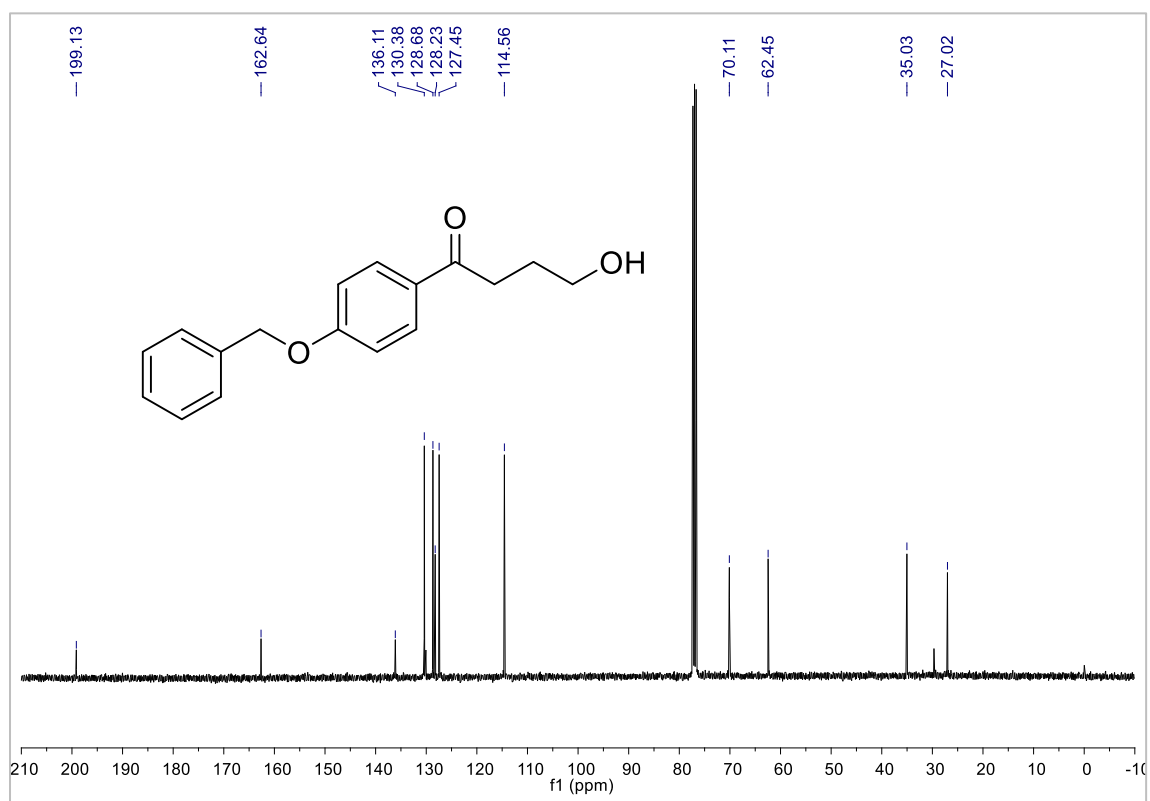

$^{13}\text{C}$  NMR spectrum of **9** (100 MHz,  $\text{CDCl}_3$ ).

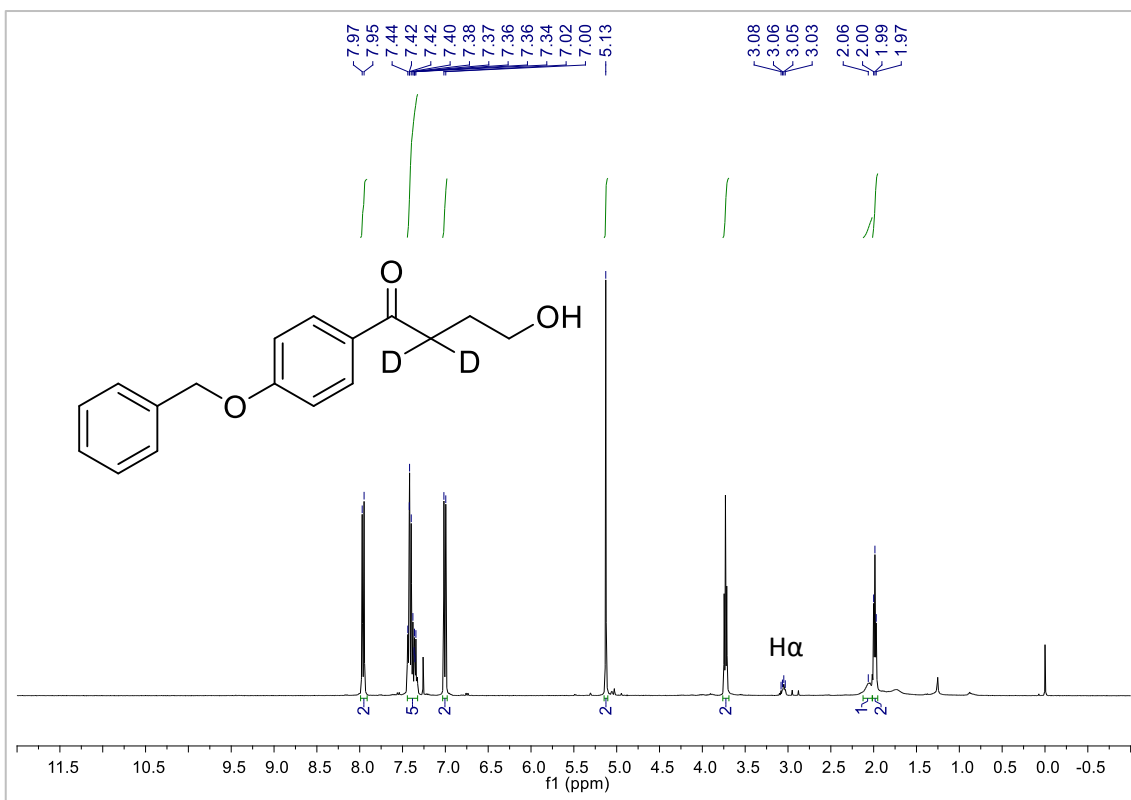

<sup>1</sup>H NMR spectrum of **9-d<sub>2</sub>** (400 MHz, CDCl<sub>3</sub>).

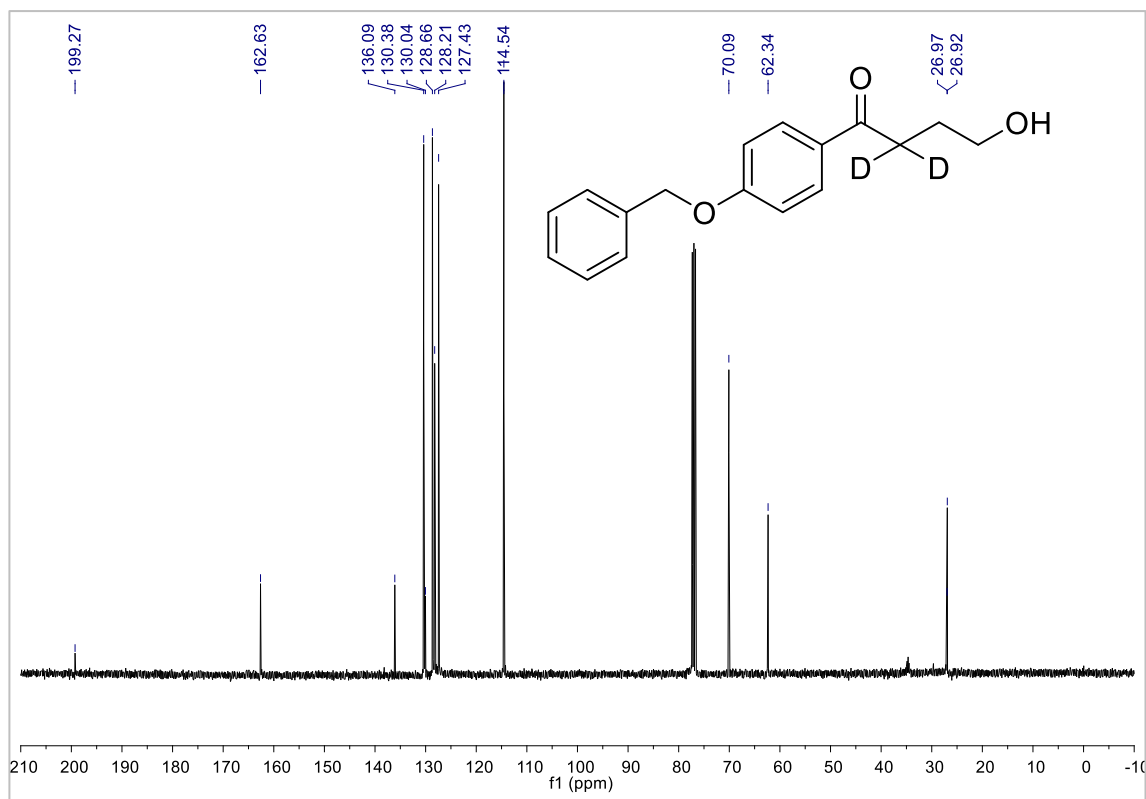

<sup>13</sup>C NMR spectrum of **9-d<sub>2</sub>** (100 MHz, CDCl<sub>3</sub>).

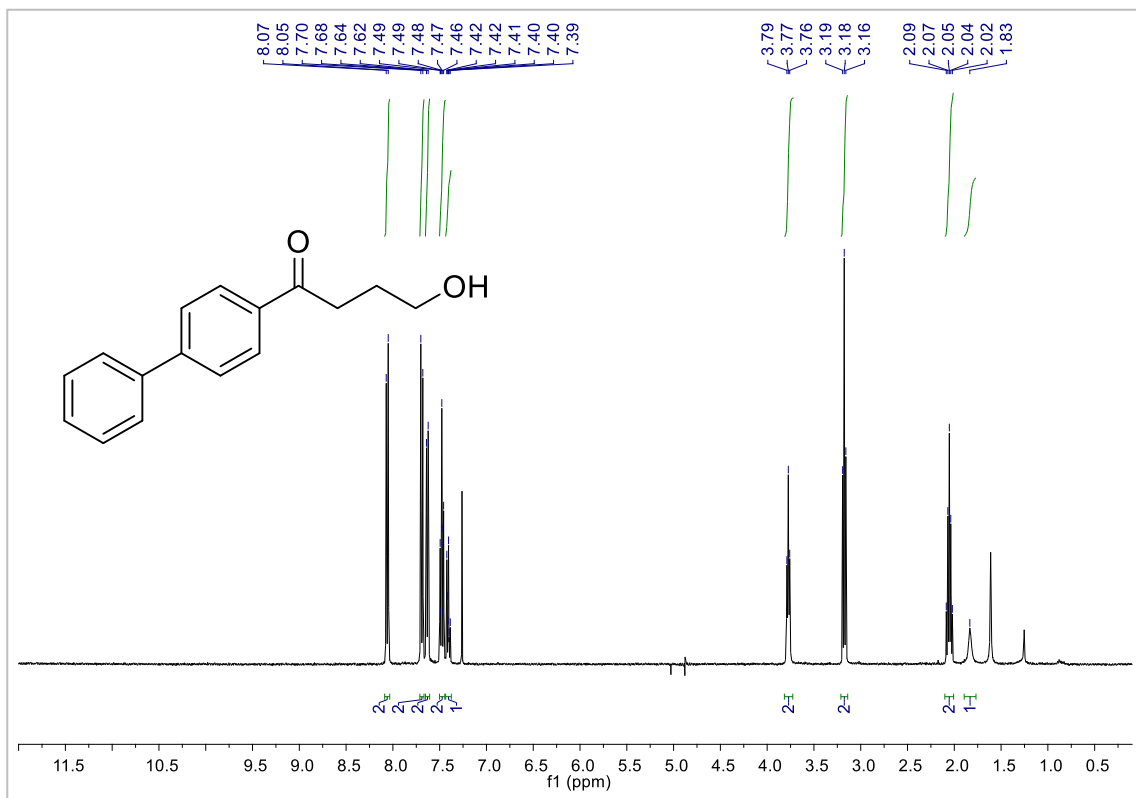

<sup>1</sup>H NMR spectrum of **10** (400 MHz, CDCl<sub>3</sub>).

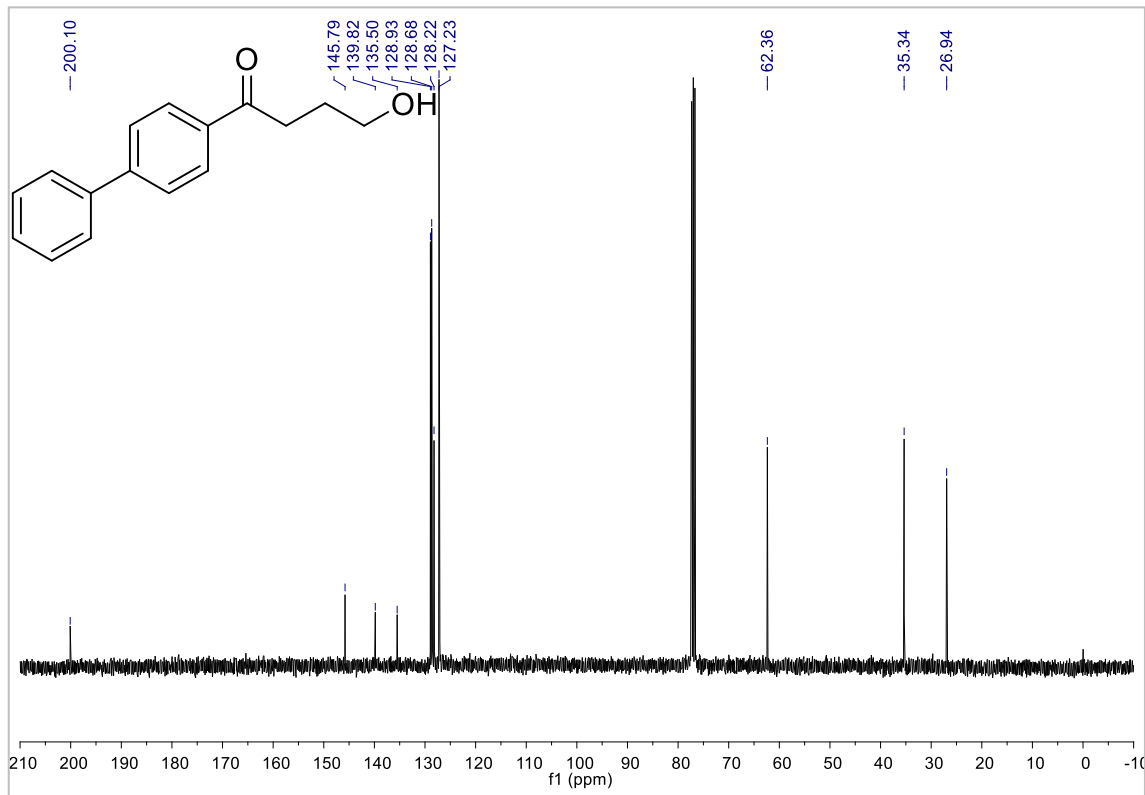

<sup>13</sup>C NMR spectrum of **10** (100 MHz, CDCl<sub>3</sub>).

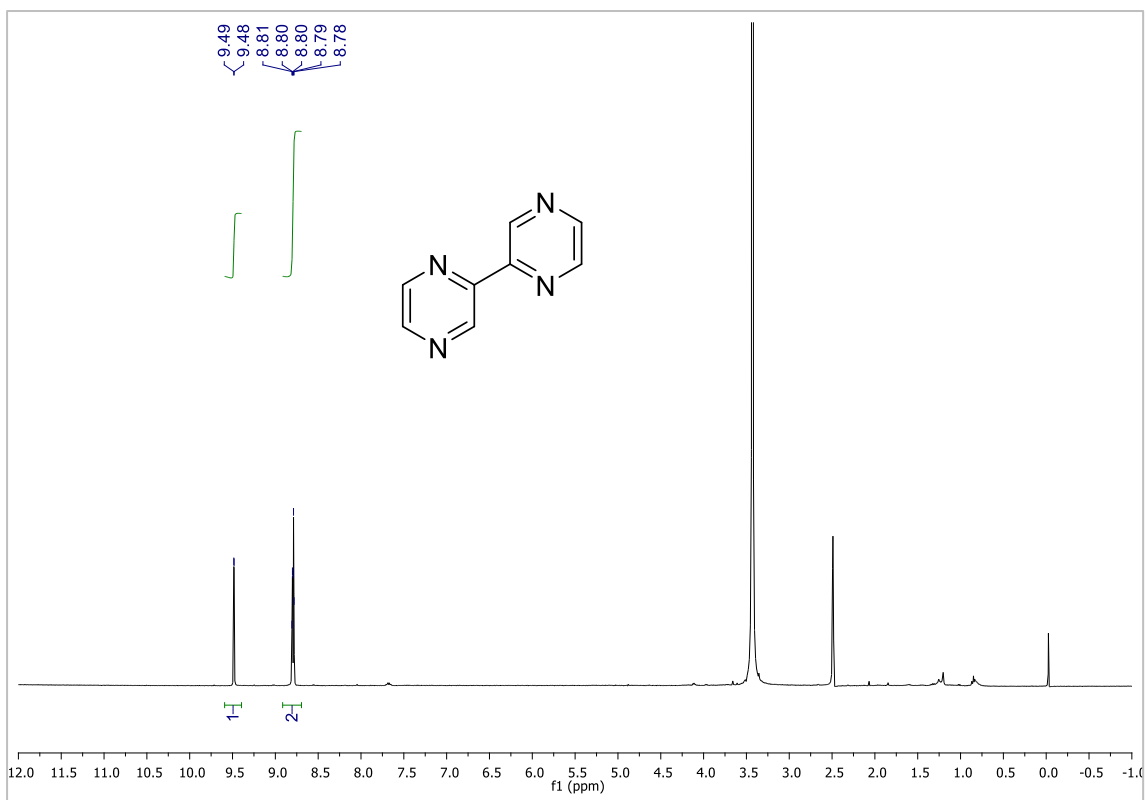

<sup>1</sup>H NMR spectrum of **11** (400 MHz, DMSO-*d*<sub>6</sub>).

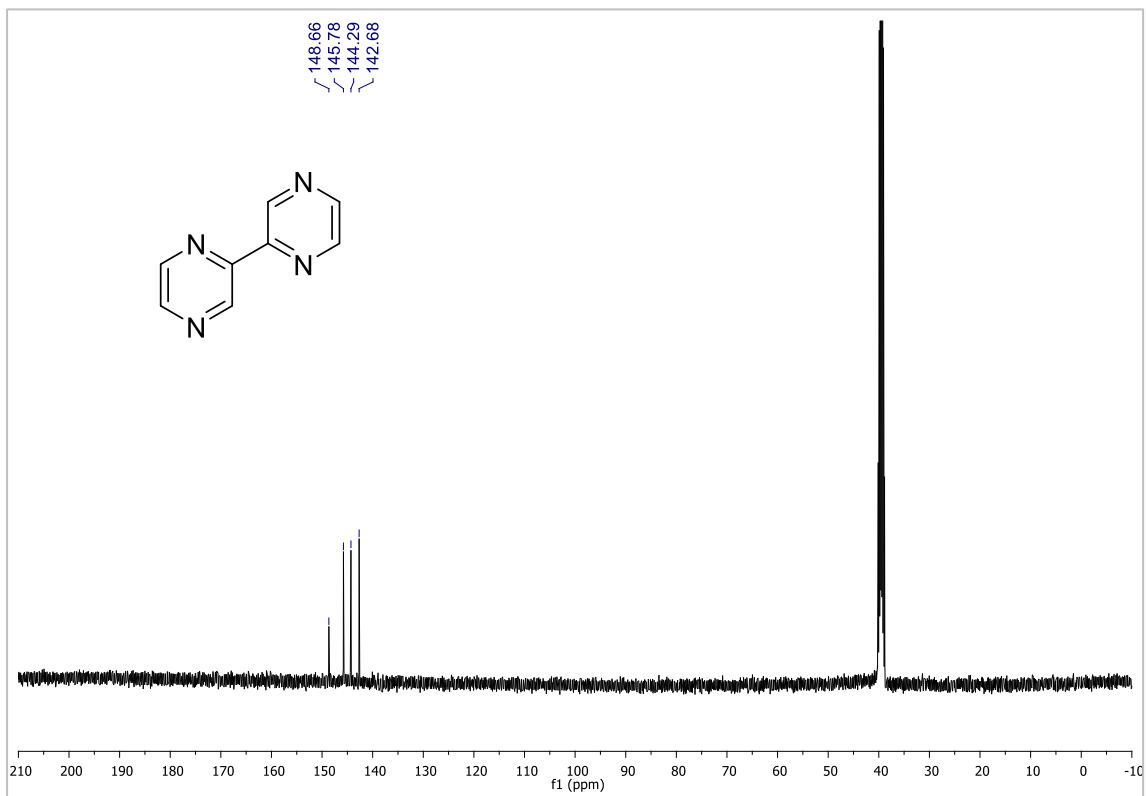

<sup>13</sup>C NMR spectrum of **11** (100 MHz, DMSO-*d*<sub>6</sub>).

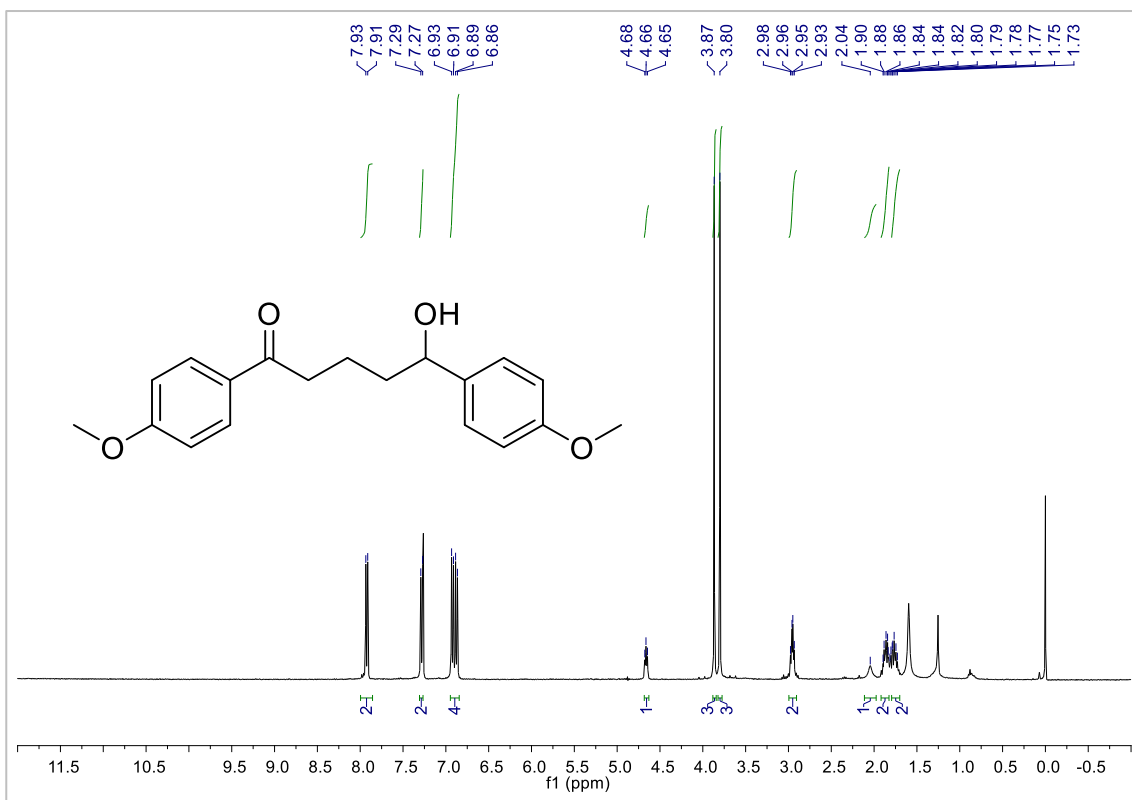

<sup>1</sup>H NMR spectrum of **12** (400 MHz, CDCl<sub>3</sub>).

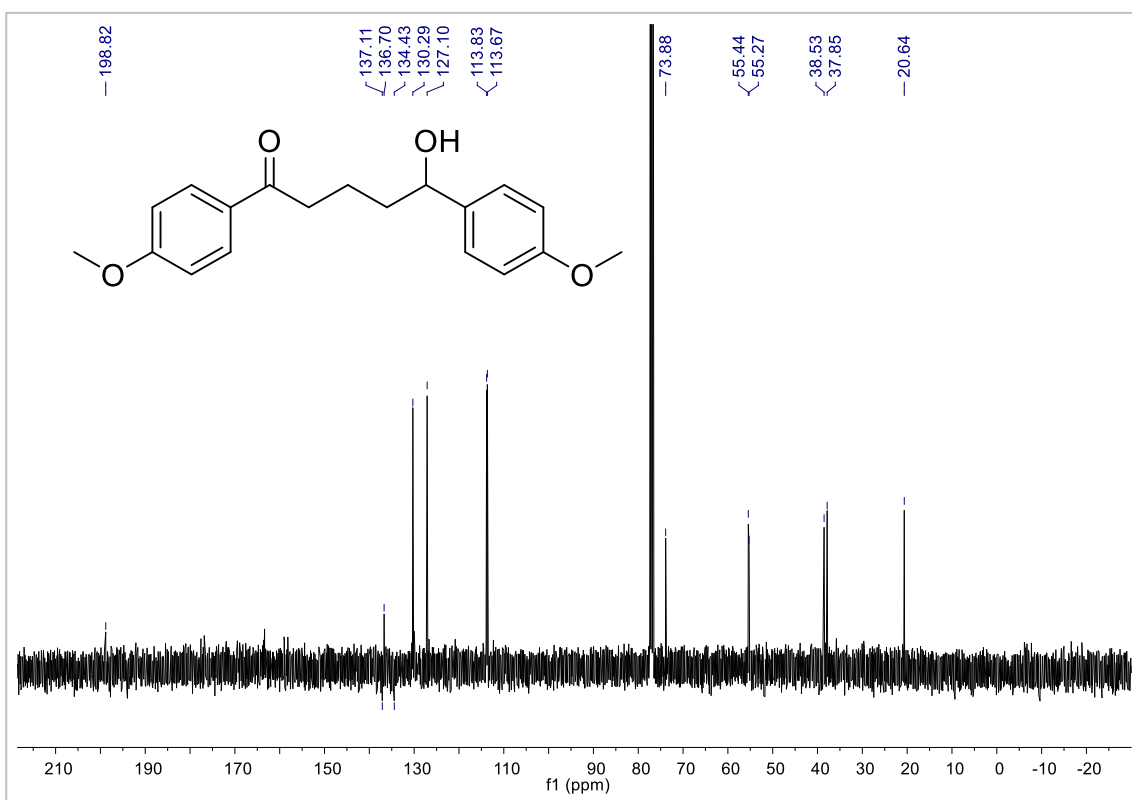

<sup>13</sup>C NMR spectrum of **12** (100 MHz, CDCl<sub>3</sub>).



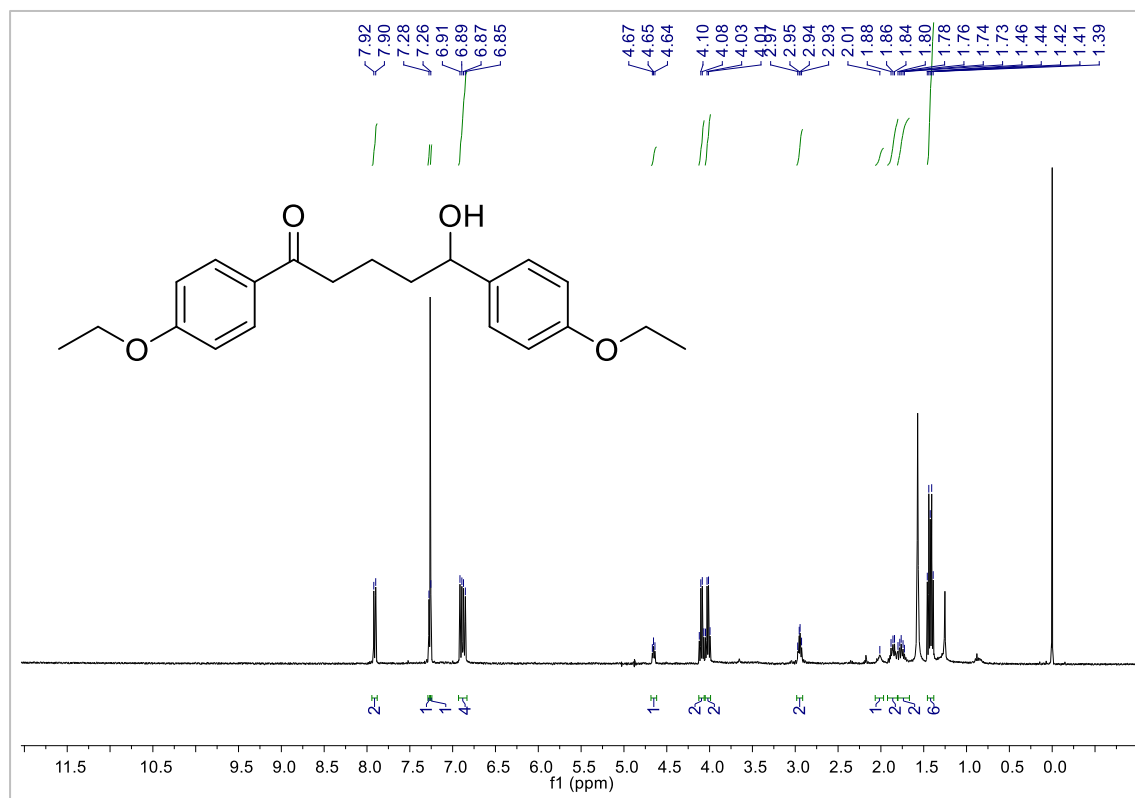

<sup>1</sup>H NMR spectrum of **13** (400 MHz, CDCl<sub>3</sub>).

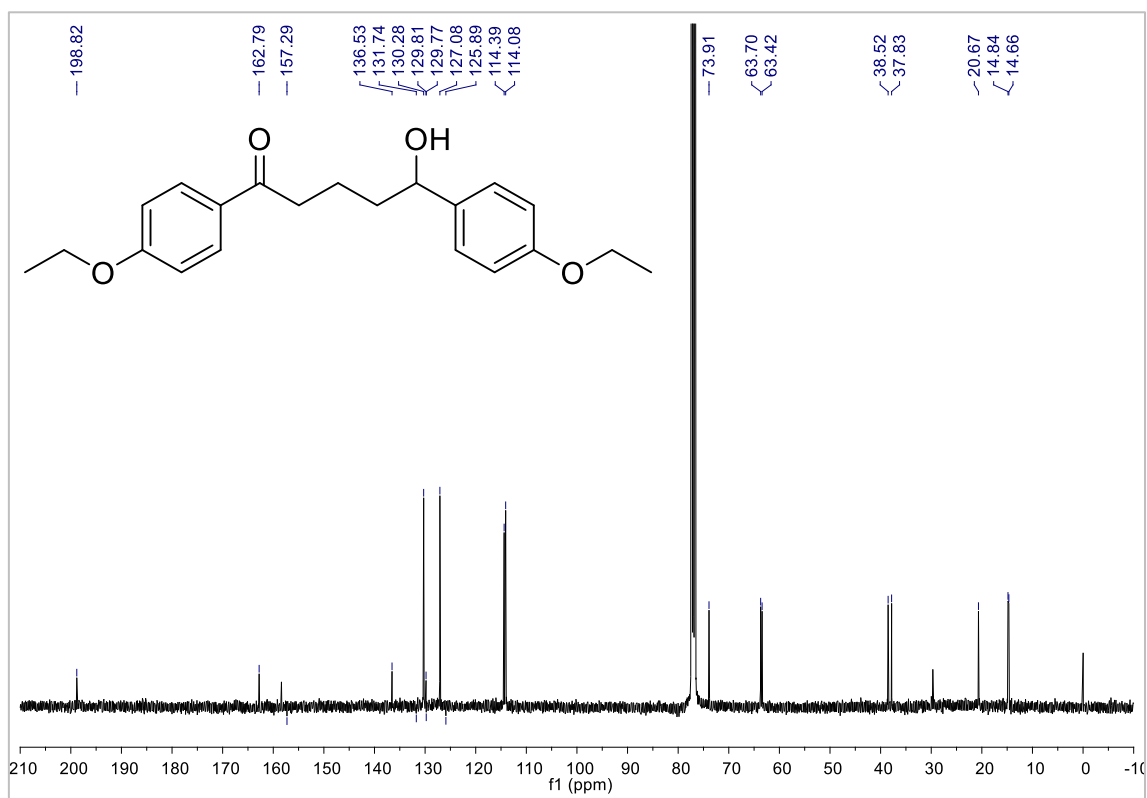

<sup>13</sup>C NMR spectrum of **13** (100 MHz, CDCl<sub>3</sub>).

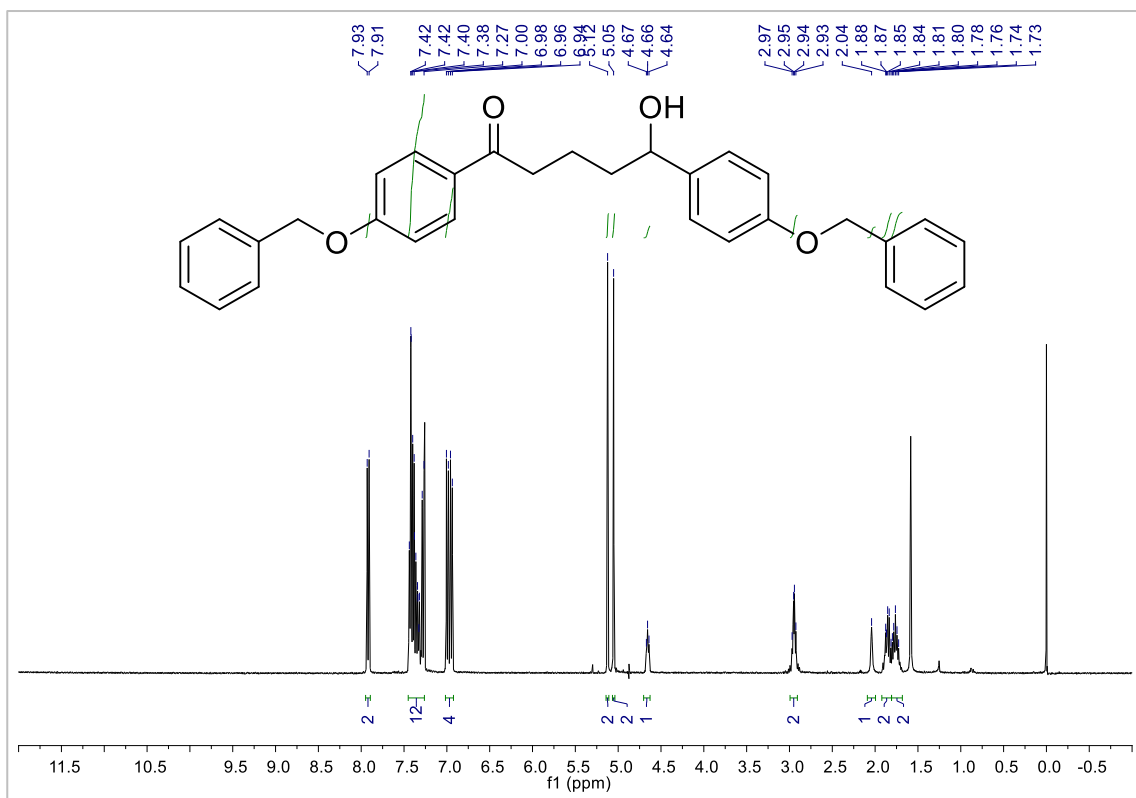

<sup>1</sup>H NMR spectrum of **14** (400 MHz, CDCl<sub>3</sub>).

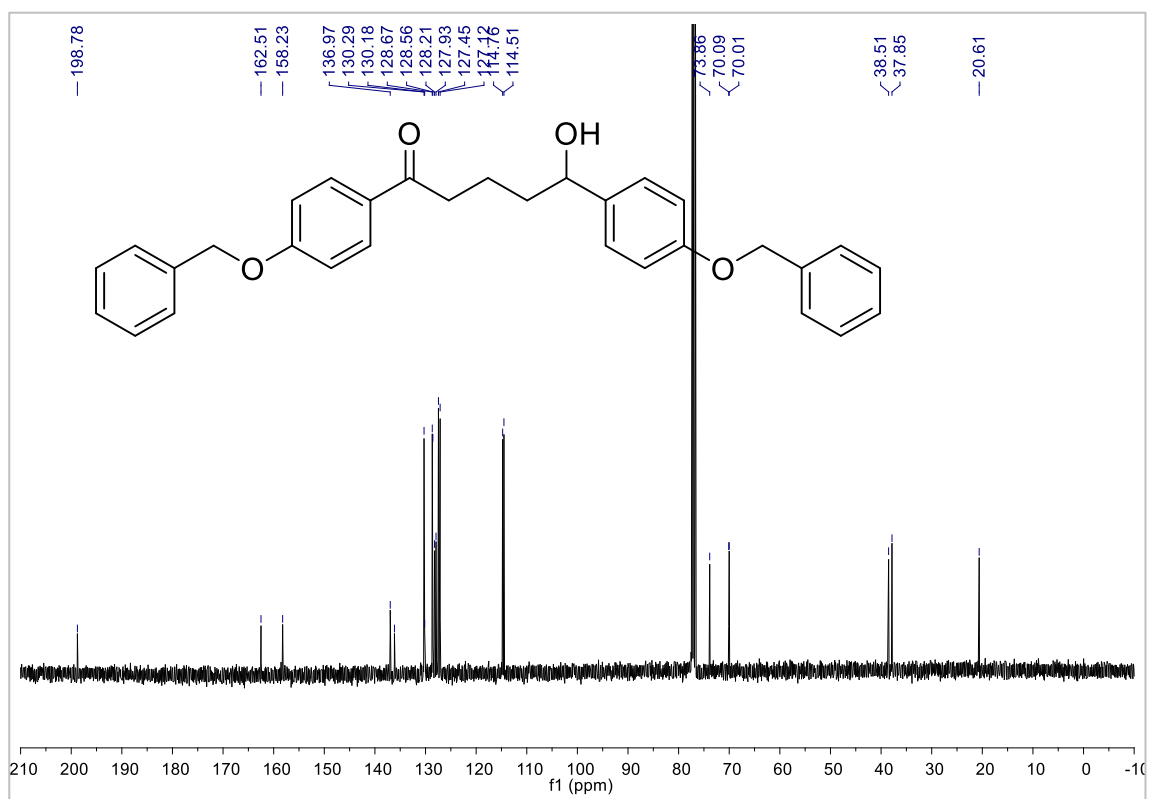

<sup>13</sup>C NMR spectrum of **14** (100 MHz, CDCl<sub>3</sub>).

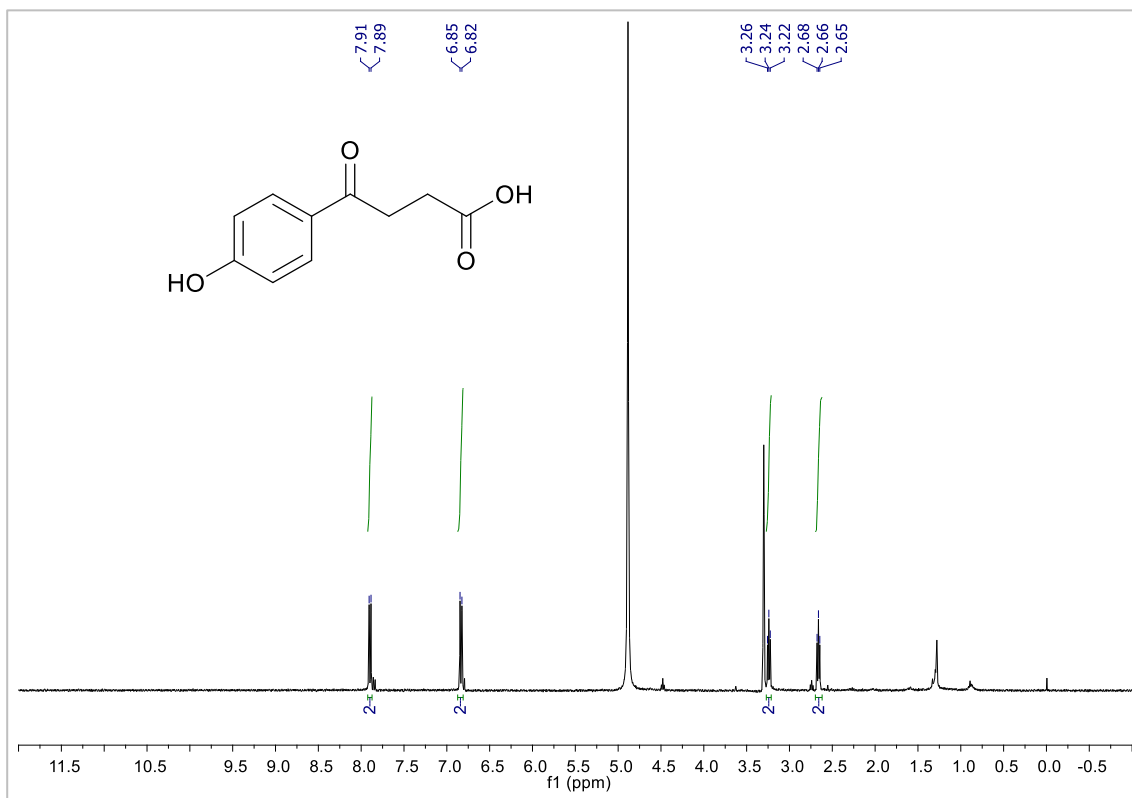

$^1\text{H}$  NMR spectrum of **15** (400 MHz,  $\text{CDCl}_3$ ).

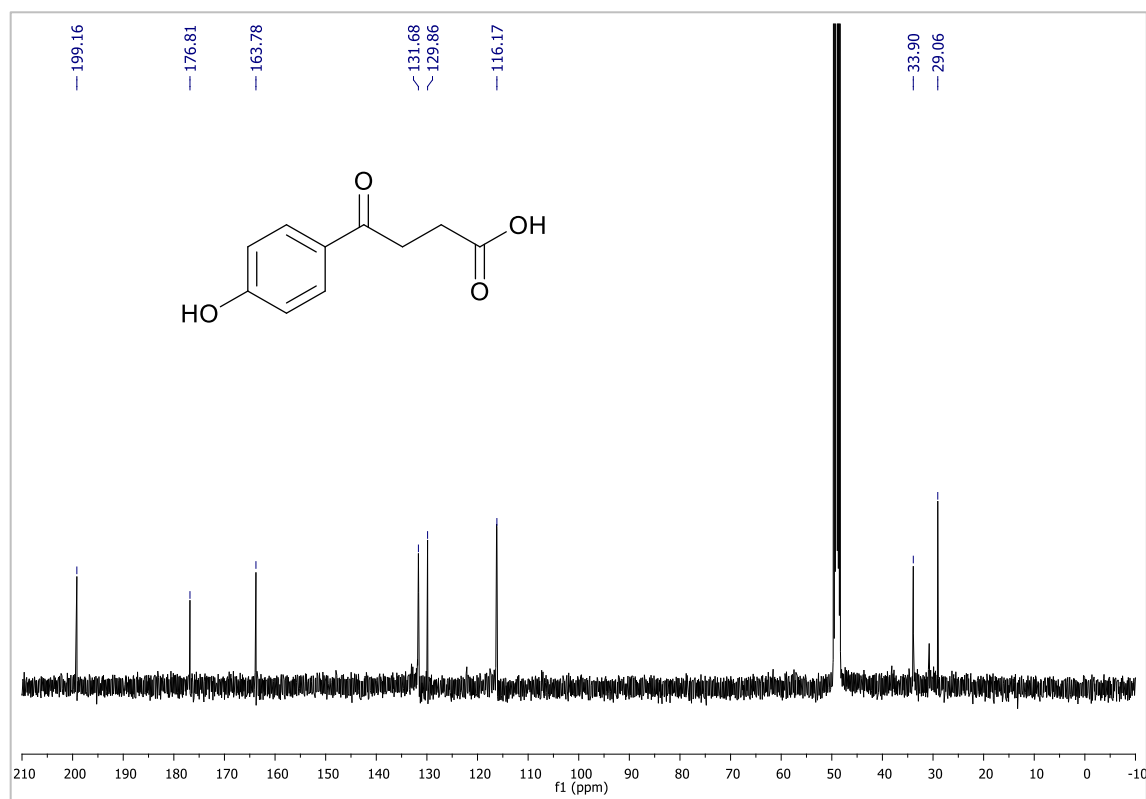

$^{13}\text{C}$  NMR spectrum of **15** (100 MHz,  $\text{CDCl}_3$ ).

## 2. Crystal data and X-ray crystallographic structure of compound 1 (methyl ester).

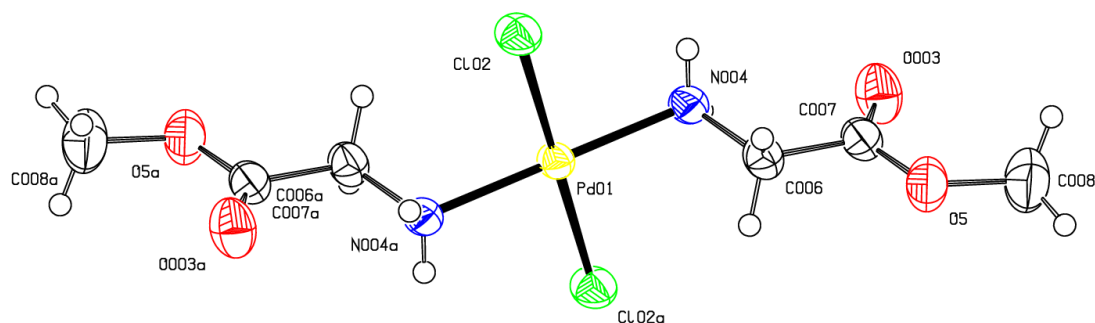

Empirical formula C<sub>6</sub>H<sub>14</sub>Cl<sub>2</sub>N<sub>2</sub>O<sub>4</sub>Pd

Formula weight 355.51

Temperature/K 298.15

Crystal system monoclinic

Space group P2<sub>1</sub>/c

a/Å 9.0537(3)

b/Å 12.1660(4)

c/Å 5.4933(2)

α/° 90

β/° 96.5990(10)

γ/° 90

Volume/Å<sup>3</sup> 601.06(4)

Z 2

ρ<sub>calc</sub>/cm<sup>3</sup> 1.9642

μ/mm<sup>-1</sup> 1.985

F(000) 350.8

Crystal size/mm<sup>3</sup> 0.3 × 0.14 × 0.04

Radiation Mo Kα (λ = 0.71073)

2θ range for data collection/° 5.64 to 56.06

Index ranges -11 ≤ h ≤ 11, -16 ≤ k ≤ 16, -7 ≤ l ≤ 7

Reflections collected 23919

Independent reflections 1443 [R<sub>int</sub> = 0.0483, R<sub>sigma</sub> = 0.0169]

Data/restraints/parameters 1443/0/79

Goodness-of-fit on F<sup>2</sup> 1.130

Final R indexes [I ≥ 2σ(I)] R<sub>1</sub> = 0.0247, wR<sub>2</sub> = 0.0505

Final R indexes [all data] R<sub>1</sub> = 0.0309, wR<sub>2</sub> = 0.0536

Largest diff. peak/hole / e Å<sup>-3</sup> 0.40/-0.50

### Bond Lengths for 1

Atom Atom Length/Å Atom Atom Length/Å

Pd01 Cl02 2.2947(7)

Pd01 Cl02-1 2.2947(7)

Pd01 N004 2.040(2)

O003 C007 1.195(4)

N004 C006 1.459(4)  
 O5 C007 1.328(4)  
 O5 C008 1.472(4)  
 Pd01 N004-1 2.040(2)  
 C006 C007 1.507(4)

### Bond Angles for 1

| Atom      | Atom  | Atom     | Angle/°  | Atom | Atom | Atom     | Angle/°    |
|-----------|-------|----------|----------|------|------|----------|------------|
| Cl021     | Pd01  | Cl02     | 180.0    | C006 | N004 | Pd01     | 112.41(17) |
| N004      | Pd01  | Cl02     | 90.48(8) | C008 | O5   | C007     | 117.4(3)   |
| N004      | Pd01  | Cl021    | 89.52(8) | C007 | C006 | N004     | 112.9(2)   |
| N0041Pd01 | Cl02  | 89.52(8) | O5       | C007 | O003 | 124.9(3) |            |
| N0041Pd01 | Cl021 | 90.48(8) | C006     | C007 | O003 | 125.1(3) |            |
| N0041Pd01 | N004  | 180.0    | C006     | C007 | O5   | 110.0(2) |            |

### Crystal data and X-ray crystallographic structure of compound 5.

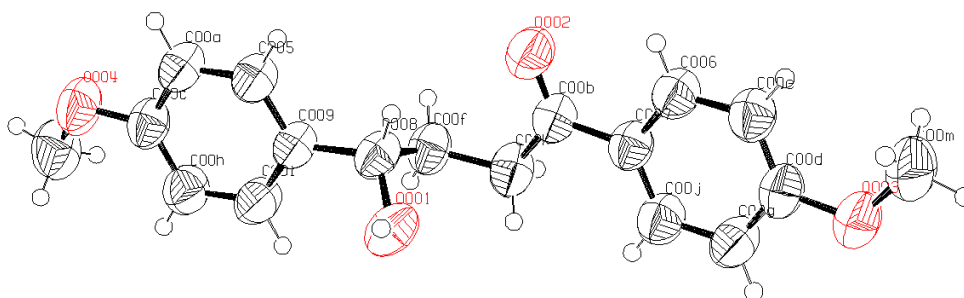

Empirical formula C<sub>18</sub>H<sub>20</sub>O<sub>4</sub>  
 Formula weight 300.34  
 Temperature/K 273.15  
 Crystal system monoclinic  
 Space group P21  
 a/Å 11.1124(5)  
 b/Å 5.2113(2)  
 c/Å 13.3792(6)  
 α/° 90  
 β/° 93.648(2)  
 γ/° 90  
 Volume/Å<sup>3</sup> 773.22(6)  
 Z 2  
 ρ<sub>calc</sub>/cm<sup>3</sup> 1.290  
 μ/mm<sup>-1</sup> 0.736  
 F(000) 320.0  
 Crystal size/mm<sup>3</sup> 0.3 × 0.1 × 0.04  
 Radiation CuKα (λ = 1.54178)  
 2θ range for data collection/° 6.62 to 125.08

Index ranges  $-12 \leq h \leq 12$ ,  $-5 \leq k \leq 5$ ,  $-15 \leq l \leq 15$   
Reflections collected 18846  
Independent reflections 2454 [Rint = 0.0703, Rsigma = 0.0402]  
**JAV\_JC\_11\_0m**  
23/10/  
2454/1/203  
Goodness-of-fit on F2 1.072  
Final R indexes [ $|I| \geq 2\sigma(I)$ ] R1 = 0.0511, wR2 = 0.1338  
Final R indexes [all data] R1 = 0.0584, wR2 = 0.1435  
Largest diff. peak/hole /  $e \text{ \AA}^{-3}$  0.17/-0.13  
Flack parameter 0.04(14).

### Bond Lengths for 5

#### Atom Atom Length/Å Atom Atom Length/Å

O001 C00B 1.226(5) C00D C00G 1.387(6)  
O002 C008 1.435(5) C00E C007 1.384(5)  
O003 C00D 1.366(4) C00F C00K 1.528(5)  
O003 C00M 1.428(6) C00F C008 1.518(6)  
O004 C00C 1.379(4) C00G C00J 1.371(6)  
O004 C00L 1.422(7) C00H C00I 1.383(6)  
C00A C00C 1.382(6) C00I C009 1.392(6)  
C00A C006 1.382(5) C00J C005 1.383(6)  
C00B C00K 1.501(6) C005 C007 1.391(6)  
C00B C005 1.497(5) C006 C009 1.380(5)  
C00C C00H 1.368(6) C008 C009 1.503(5)

### Bond Angles for 5

#### Atom Atom Atom Angle/° Atom Atom Atom Angle/°

C00D O003 C00M 118.1(4) C00C C00H C00I 120.2(4)  
C00C O004 C00L 116.8(4) C00H C00I C009 121.5(4)  
C006 C00A C00C 119.9(4) C00G C00J C005 121.3(4)  
O001 C00B C00K 121.3(4) C00B C00K C00F 114.7(4)  
O001 C00B C005 120.2(4) C00J C005 C00B 123.7(4)  
C005 C00B C00K 118.5(4) C00J C005 C007 118.0(4)  
O004 C00C C00A 115.3(4) C007 C005 C00B 118.2(4)  
C00H C00C O004 125.2(4) C009 C006 C00A 121.7(4)  
C00H C00C C00A 119.5(4) C00E C007 C005 121.4(4)  
O003 C00D C00E 124.1(4) O002 C008 C00F 107.8(3)  
O003 C00D C00G 116.0(4) O002 C008 C009 111.5(3)  
C00E C00D C00G 120.0(4) C009 C008 C00F 112.4(3)  
C00D C00E C007 119.3(4) C00I C009 C008 121.4(4)  
C008 C00F C00K 114.0(4) C006 C009 C00I 117.2(3)  
C00J C00G C00D 120.0(4) C006 C009 C008 121.3(4)

### 3. Figures and Coordinates of structures of minima along the Catalytic Cycle.

Geometries along the catalytic cycle were calculated. Single points at the PBE0/TZDP(COSMO-DMF) over full optimizations at the PBE0/DZ level of theory were performed using the Amsterdam Density Functional software.<sup>1</sup>The final minimum geometries along the catalytic cycle were confirmed by calculation of frequencies.

Color code in figures: carbon atoms as grey spheres, nitrogen atoms as blue spheres, oxygen atoms as red spheres, hydrogen atoms as white spheres, palladium atoms as orange spheres, chlorine atoms as green spheres, iodine atoms as purple spheres.

Orbital energies obtained for the structure B)  
(Observe the value of HOMO, -0.1615798267550 a.u.)

\* RESULTS \*  
\*\*\*\*\*

\*\*\* Setting up for NEW gradients in focky  
\*\*\* Using FIT density in focky

Hartree-Fock exchange energy: -212.667061628707

Hartree-Fock exchange energy: -212.667061628707

Scaled ZORA Orbital Energies, per Irrep and Spin:

```
=====
```

|   | Occup | E (au) | E (eV)                | Diff (eV) with prev. cycle |
|---|-------|--------|-----------------------|----------------------------|
| A |       |        |                       |                            |
|   | 54    | 2.000  | -0.27758236254402E+00 | -7.553 6.03E-07            |
|   | 55    | 2.000  | -0.26391480935024E+00 | -7.181 -4.62E-06           |
|   | 56    | 2.000  | -0.26319378959403E+00 | -7.162 2.65E-06            |
|   | 57    | 2.000  | -0.26282260328150E+00 | -7.152 4.24E-06            |
|   | 58    | 2.000  | -0.25319125167616E+00 | -6.890 7.97E-07            |
|   | 59    | 2.000  | -0.19704457485430E+00 | -5.362 7.13E-07            |
|   | 60    | 2.000  | -0.19688296347595E+00 | -5.357 7.99E-07            |
|   | 61    | 2.000  | -0.18996638342079E+00 | -5.169 7.51E-07            |
|   | 62    | 2.000  | -0.18983829531572E+00 | -5.166 7.93E-07            |
|   | 63    | 2.000  | -0.16157982675508E+00 | -4.397 7.65E-07            |
|   | 64    | 0.000  | 0.11481474614491E-01  | 0.312                      |
|   | 65    | 0.000  | 0.28407103515336E-01  | 0.773                      |
|   | 66    | 0.000  | 0.30158997703452E-01  | 0.821                      |
|   | 67    | 0.000  | 0.42131354385244E-01  | 1.146                      |
|   | 68    | 0.000  | 0.44694194954064E-01  | 1.216                      |
|   | 69    | 0.000  | 0.55014895772756E-01  | 1.497                      |
|   | 70    | 0.000  | 0.72146537486032E-01  | 1.963                      |
|   | 71    | 0.000  | 0.86032407694840E-01  | 2.341                      |
|   | 72    | 0.000  | 0.99456272376864E-01  | 2.706                      |
|   | 73    | 0.000  | 0.10311295621141E+00  | 2.806                      |

HOMO : 63 A -0.16157982675508E+00  
LUMO : 64 A 0.11481474614491E-01

COSMO charges converged: Iteration # 34 Conv 3.148105E-09

The total uncorrected surface charge : 1.90365020

cosmo\_calcn: solen (Hartrees) = -0.289858

Solvation energy (screening term,uncorrected) = -181.888922 kcal/mol

Solvation energy (dispersion and cavitation terms) = 1.349174 kcal/mol

Solvation Energy Contributions (Hartrees)

| esola      | esolb       | esolc       |
|------------|-------------|-------------|
| 0.28985845 | 0.00000000  | -0.57971690 |
| esol       | -0.28985845 |             |



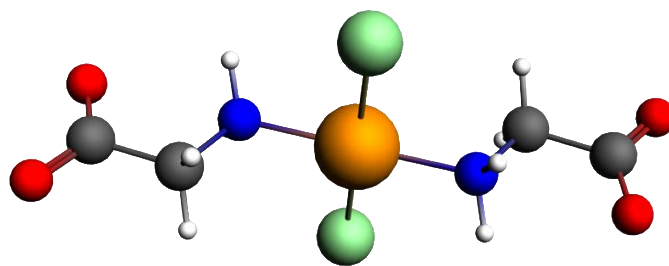

### Compound A Coordinates (Cartesian)

=====

| Atom  | bohr       |           |           | angstrom  |          |           | Geometric Variables   |    |    |
|-------|------------|-----------|-----------|-----------|----------|-----------|-----------------------|----|----|
|       | X          | Y         | Z         | X         | Y        | Z         | (0:frozen, *:LT par.) |    |    |
| 1 Pd  | -1.938416  | 8.935767  | 2.324136  | -1.025765 | 4.728604 | 1.229880  | 1                     | 2  | 3  |
| 2 C   | 3.621910   | 9.399524  | 1.293919  | 1.916632  | 4.974014 | 0.684712  | 4                     | 5  | 6  |
| 3 C   | 5.946153   | 11.048082 | 0.555078  | 3.146569  | 5.846393 | 0.293735  | 7                     | 8  | 9  |
| 4 N   | 1.237051   | 10.879944 | 1.240011  | 0.654619  | 5.757418 | 0.656185  | 10                    | 11 | 12 |
| 5 O   | 8.036448   | 9.859519  | 0.419373  | 4.252705  | 5.217433 | 0.221923  | 13                    | 14 | 15 |
| 6 O   | 5.499345   | 13.399499 | 0.184366  | 2.910128  | 7.090709 | 0.097562  | 16                    | 17 | 18 |
| 7 H   | 3.882940   | 8.665515  | 3.201160  | 2.054763  | 4.585593 | 1.693981  | 19                    | 20 | 21 |
| 8 H   | 0.958181   | 11.525397 | -0.557848 | 0.507048  | 6.098977 | -0.295200 | 22                    | 23 | 24 |
| 9 H   | 1.477660   | 12.430619 | 2.365663  | 0.781944  | 6.578000 | 1.251855  | 25                    | 26 | 27 |
| 10 H  | -5.361120  | 5.473755  | 2.216569  | -2.836983 | 2.896586 | 1.172958  | 28                    | 29 | 30 |
| 11 H  | 3.444712   | 7.821276  | -0.016479 | 1.822863  | 4.138841 | -0.008720 | 31                    | 32 | 33 |
| 12 C  | -7.482989  | 8.471579  | 3.434041  | -3.959827 | 4.482967 | 1.817216  | 34                    | 35 | 36 |
| 13 C  | -9.796964  | 6.830240  | 4.220224  | -5.184330 | 3.614407 | 2.233246  | 37                    | 38 | 39 |
| 14 N  | -5.107608  | 6.977358  | 3.401262  | -2.702830 | 3.692259 | 1.799870  | 40                    | 41 | 42 |
| 15 O  | -11.891388 | 8.013966  | 4.336796  | -6.292652 | 4.240808 | 2.294934  | 43                    | 44 | 45 |
| 16 O  | -9.337430  | 4.491901  | 4.650870  | -4.941155 | 2.377012 | 2.461134  | 46                    | 47 | 48 |
| 17 H  | -7.256342  | 10.028423 | 4.762971  | -3.839891 | 5.306813 | 2.520456  | 49                    | 50 | 51 |
| 18 H  | -7.793817  | 9.237588  | 1.547196  | -4.124311 | 4.888321 | 0.818741  | 52                    | 53 | 54 |
| 19 H  | -4.814973  | 6.260790  | 5.169798  | -2.547974 | 3.313067 | 2.735739  | 55                    | 56 | 57 |
| 20 Cl | -1.095880  | 9.936826  | 6.686076  | -0.579915 | 5.258342 | 3.538119  | 58                    | 59 | 60 |
| 21 Cl | -2.754809  | 7.893776  | -2.036454 | -1.457782 | 4.177206 | -1.077645 | 61                    | 62 | 63 |

-----

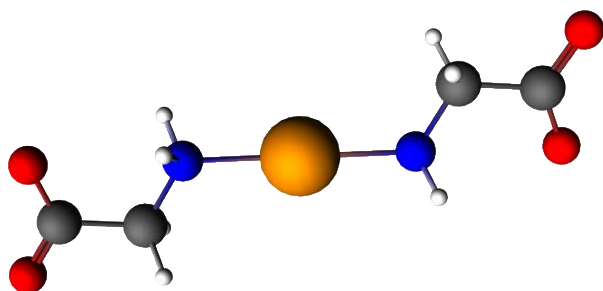

Compound **B**: Coordinates (Cartesian)

=====

| Atom  | bohr       |           |           | angstrom  |          |           | Geometric Variables   |    |    |
|-------|------------|-----------|-----------|-----------|----------|-----------|-----------------------|----|----|
|       | X          | Y         | Z         | X         | Y        | Z         | (0:frozen, *:LT par.) |    |    |
| ----- |            |           |           |           |          |           |                       |    |    |
| 1 Pd  | -1.942665  | 9.014107  | 2.372684  | -1.028014 | 4.770060 | 1.255571  | 1                     | 2  | 3  |
| 2 C   | 3.505334   | 10.648020 | 0.830225  | 1.854943  | 5.634689 | 0.439336  | 4                     | 5  | 6  |
| 3 C   | 6.346135   | 10.951985 | 1.509580  | 3.358230  | 5.795541 | 0.798836  | 7                     | 8  | 9  |
| 4 N   | 1.969201   | 9.541420  | 2.901869  | 1.042056  | 5.049102 | 1.535603  | 10                    | 11 | 12 |
| 5 O   | 7.729817   | 11.872497 | -0.247430 | 4.090443  | 6.282655 | -0.130934 | 13                    | 14 | 15 |
| 6 O   | 7.010762   | 10.262349 | 3.737446  | 3.709936  | 5.430601 | 1.977771  | 16                    | 17 | 18 |
| 7 H   | 3.328363   | 9.447725  | -0.834707 | 1.761294  | 4.999521 | -0.441708 | 19                    | 20 | 21 |
| 8 H   | 2.206440   | 10.639512 | 4.469450  | 1.167598  | 5.630187 | 2.365131  | 22                    | 23 | 24 |
| 9 H   | 2.725485   | 7.826913  | 3.356946  | 1.442265  | 4.141824 | 1.776419  | 25                    | 26 | 27 |
| 10 H  | -6.614142  | 10.214081 | 1.454423  | -3.500053 | 5.405059 | 0.769647  | 28                    | 29 | 30 |
| 11 H  | 2.723459   | 12.491317 | 0.344749  | 1.441193  | 6.610120 | 0.182433  | 31                    | 32 | 33 |
| 12 C  | -7.374899  | 7.304684  | 3.887275  | -3.902629 | 3.865472 | 2.057057  | 34                    | 35 | 36 |
| 13 C  | -10.209609 | 6.972389  | 3.196042  | -5.402692 | 3.689630 | 1.691272  | 37                    | 38 | 39 |
| 14 N  | -5.854486  | 8.485302  | 1.844997  | -3.098061 | 4.490229 | 0.976330  | 40                    | 41 | 42 |
| 15 O  | -11.591126 | 6.035145  | 4.945820  | -6.133760 | 3.193661 | 2.617215  | 43                    | 44 | 45 |
| 16 O  | -10.870783 | 7.653043  | 0.964338  | -5.752570 | 4.049816 | 0.510305  | 46                    | 47 | 48 |
| 17 H  | -6.565171  | 5.461406  | 4.325660  | -3.474139 | 2.890052 | 2.289040  | 49                    | 50 | 51 |
| 18 H  | -7.217271  | 8.464147  | 5.582558  | -3.819216 | 4.479034 | 2.954163  | 52                    | 53 | 54 |
| 19 H  | -6.103757  | 7.440895  | 0.242733  | -3.229969 | 3.937552 | 0.128449  | 55                    | 56 | 57 |
| ----- |            |           |           |           |          |           |                       |    |    |

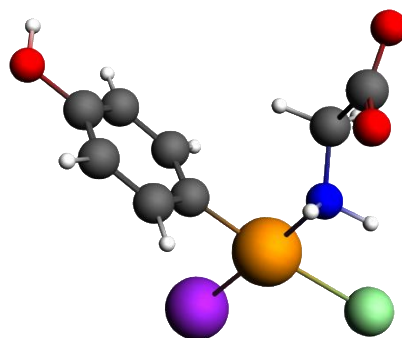

Compound C: Coordinates (Cartesian)

=====

| Atom | bohr      |           |            | angstrom  |           |           | Geometric Variables   |    |    |
|------|-----------|-----------|------------|-----------|-----------|-----------|-----------------------|----|----|
|      | X         | Y         | Z          | X         | Y         | Z         | (0:frozen, *:LT par.) |    |    |
| 1 Pd | -1.245896 | 0.470207  | -0.551269  | -0.659300 | 0.248823  | -0.291719 | 1                     | 2  | 3  |
| 2 C  | 4.432511  | -1.041360 | -0.951261  | 2.345584  | -0.551064 | -0.503386 | 4                     | 5  | 6  |
| 3 C  | 7.223960  | -0.124124 | -0.923506  | 3.822755  | -0.065684 | -0.488698 | 7                     | 8  | 9  |
| 4 N  | 2.666411  | 0.959911  | -0.098016  | 1.411004  | 0.507963  | -0.051868 | 10                    | 11 | 12 |
| 5 O  | 7.543645  | 2.278123  | -0.824572  | 3.991925  | 1.205531  | -0.436345 | 13                    | 14 | 15 |
| 6 O  | 8.894093  | -1.860034 | -1.065961  | 4.706551  | -0.984288 | -0.564082 | 16                    | 17 | 18 |
| 7 H  | 4.219568  | -2.694594 | 0.256019   | 2.232899  | -1.425918 | 0.135480  | 19                    | 20 | 21 |
| 8 H  | 3.296010  | 2.612513  | -0.886871  | 1.744173  | 1.382482  | -0.469312 | 22                    | 23 | 24 |
| 9 H  | 2.766475  | 1.172402  | 1.823108   | 1.463955  | 0.620408  | 0.964747  | 25                    | 26 | 27 |
| 10 I | -6.251136 | -0.153157 | -1.315806  | -3.307959 | -0.081047 | -0.696295 | 28                    | 29 | 30 |
| 11 H | 3.940103  | -1.566366 | -2.884948  | 2.085013  | -0.828885 | -1.526649 | 31                    | 32 | 33 |
| 12 C | -0.689016 | -0.014491 | -4.234732  | -0.364611 | -0.007668 | -2.240924 | 34                    | 35 | 36 |
| 13 C | -0.877218 | -2.410984 | -5.349647  | -0.464204 | -1.275838 | -2.830911 | 37                    | 38 | 39 |
| 14 C | -0.278641 | -2.802378 | -7.892339  | -0.147451 | -1.482955 | -4.176446 | 40                    | 41 | 42 |
| 15 C | 0.519145  | -0.778179 | -9.359561  | 0.274720  | -0.411794 | -4.952866 | 43                    | 44 | 45 |
| 16 C | 0.697971  | 1.622666  | -8.331668  | 0.369350  | 0.858678  | -4.408929 | 46                    | 47 | 48 |
| 17 C | 0.089397  | 1.988263  | -5.787676  | 0.047307  | 1.052143  | -3.062706 | 49                    | 50 | 51 |
| 18 H | -1.527070 | -3.992433 | -4.225707  | -0.808091 | -2.112705 | -2.236148 | 52                    | 53 | 54 |
| 19 H | -0.469934 | -4.673013 | -8.717149  | -0.248678 | -2.472852 | -4.612917 | 55                    | 56 | 57 |
| 20 O | 1.155981  | -1.063467 | -11.967274 | 0.611719  | -0.562762 | -6.332809 | 58                    | 59 | 60 |
| 21 H | 1.335845  | 3.161964  | -9.520503  | 0.706899  | 1.673239  | -5.038033 | 61                    | 62 | 63 |
| 22 H | 0.243388  | 3.874344  | -5.004894  | 0.128795  | 2.050215  | -2.648476 | 64                    | 65 | 66 |
| 23 H | 1.577577  | -2.832492 | -12.324564 | 0.834818  | -1.498890 | -6.521878 | 67                    | 68 | 69 |

24 Cl -1.402871 1.118894 4.142911 -0.742367 0.592093 2.192334 70 71 72

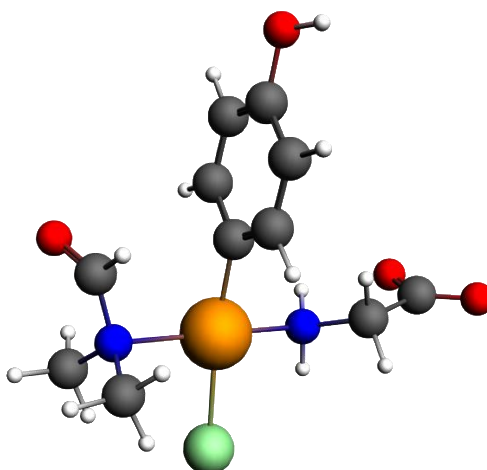

### Compound D: Coordinates (Cartesian)

=====

| Atom  | bohr      |           |           | angstrom  |           |                       | Geometric Variables |    |    |
|-------|-----------|-----------|-----------|-----------|-----------|-----------------------|---------------------|----|----|
| X     | Y         | Z         | X         | Y         | Z         | (0:frozen, *:LT par.) |                     |    |    |
| 1 Pd  | -0.215629 | 0.971185  | 0.072629  | -0.114106 | 0.513929  | 0.038434              | 1                   | 2  | 3  |
| 2 C   | 5.198959  | -0.713787 | -1.334519 | 2.751171  | -0.377720 | -0.706197             | 4                   | 5  | 6  |
| 3 C   | 6.941461  | -3.095332 | -1.411134 | 3.673263  | -1.637979 | -0.746740             | 7                   | 8  | 9  |
| 4 N   | 2.936602  | -1.265980 | 0.236993  | 1.553983  | -0.669928 | 0.125411              | 10                  | 11 | 12 |
| 5 O   | 5.868457  | -5.146390 | -0.688680 | 3.105454  | -2.723352 | -0.364434             | 13                  | 14 | 15 |
| 6 O   | 9.160176  | -2.724079 | -2.235508 | 4.847356  | -1.441521 | -1.182980             | 16                  | 17 | 18 |
| 7 H   | 4.599250  | -0.322380 | -3.263484 | 2.433818  | -0.170596 | -1.726961             | 19                  | 20 | 21 |
| 8 H   | 3.425717  | -1.145631 | 2.104891  | 1.812811  | -0.606242 | 1.113861              | 22                  | 23 | 24 |
| 9 H   | 2.553191  | -3.145500 | -0.114512 | 1.351091  | -1.664527 | -0.060597             | 25                  | 26 | 27 |
| 10 Cl | 0.712249  | 2.249110  | 4.493869  | 0.376906  | 1.190178  | 2.378053              | 28                  | 29 | 30 |
| 11 H  | 6.214805  | 0.901706  | -0.568210 | 3.288733  | 0.477162  | -0.300684             | 31                  | 32 | 33 |
| 12 C  | -0.518610 | 0.020369  | -3.578148 | -0.274436 | 0.010779  | -1.893474             | 34                  | 35 | 36 |
| 13 C  | 0.731214  | 1.483334  | -5.392017 | 0.386942  | 0.784946  | -2.853333             | 37                  | 38 | 39 |
| 14 C  | 0.645900  | 0.855555  | -7.955088 | 0.341796  | 0.452740  | -4.209651             | 40                  | 41 | 42 |
| 15 C  | -0.689215 | -1.275242 | -8.710425 | -0.364717 | -0.674829 | -4.609358             | 43                  | 44 | 45 |
| 16 C  | -1.953208 | -2.755176 | -6.952584 | -1.033593 | -1.457977 | -3.679149             | 46                  | 47 | 48 |
| 17 C  | -1.867841 | -2.099564 | -4.402921 | -0.988419 | -1.111041 | -2.329926             | 49                  | 50 | 51 |
| 18 H  | 1.824227  | 3.121758  | -4.823528 | 0.965339  | 1.651963  | -2.552501             | 52                  | 53 | 54 |
| 19 H  | 1.636622  | 2.010707  | -9.329649 | 0.866063  | 1.064020  | -4.937038             | 55                  | 56 | 57 |

|      |           |           |            |           |           |           |     |     |     |
|------|-----------|-----------|------------|-----------|-----------|-----------|-----|-----|-----|
| 20 O | -0.862401 | -2.033538 | -11.260720 | -0.456363 | -1.076102 | -5.958916 | 58  | 59  | 60  |
| 21 H | -2.964682 | -4.407468 | -7.607566  | -1.568842 | -2.332332 | -4.025751 | 61  | 62  | 63  |
| 22 H | -2.875767 | -3.264920 | -3.054943  | -1.521791 | -1.727721 | -1.616606 | 64  | 65  | 66  |
| 23 H | 0.431194  | -1.216931 | -12.308299 | 0.228178  | -0.643972 | -6.513271 | 67  | 68  | 69  |
| 24 C | -4.914720 | 2.674875  | -2.256571  | -2.600758 | 1.415483  | -1.194126 | 70  | 71  | 72  |
| 25 C | -5.190121 | 2.590626  | 2.310645   | -2.746493 | 1.370900  | 1.222741  | 73  | 74  | 75  |
| 26 O | -6.819575 | 1.345831  | -2.364330  | -3.608764 | 0.712183  | -1.251150 | 76  | 77  | 78  |
| 27 H | -4.044500 | 3.516325  | -3.923481  | -2.140257 | 1.860759  | -2.076217 | 79  | 80  | 81  |
| 28 H | -5.705867 | 0.606067  | 2.190392   | -3.019415 | 0.320717  | 1.159106  | 82  | 83  | 84  |
| 29 H | -6.921925 | 3.724924  | 2.366162   | -3.662925 | 1.971145  | 1.252119  | 85  | 86  | 87  |
| 30 H | -4.031467 | 2.905204  | 3.974791   | -2.133360 | 1.537368  | 2.103369  | 88  | 89  | 90  |
| 31 H | -1.494468 | 6.085964  | 1.797223   | -0.790839 | 3.220553  | 0.951050  | 91  | 92  | 93  |
| 32 H | -1.577827 | 6.287673  | -1.545541  | -0.834950 | 3.327294  | -0.817865 | 94  | 95  | 96  |
| 33 H | -4.272516 | 7.258025  | 0.252796   | -2.260918 | 3.840782  | 0.133774  | 97  | 98  | 99  |
| 34 N | -3.682476 | 3.279642  | 0.048194   | -1.948682 | 1.735512  | 0.025503  | 100 | 101 | 102 |
| 35 C | -2.700427 | 5.912650  | 0.140499   | -1.429004 | 3.128840  | 0.074349  | 103 | 104 | 105 |

---

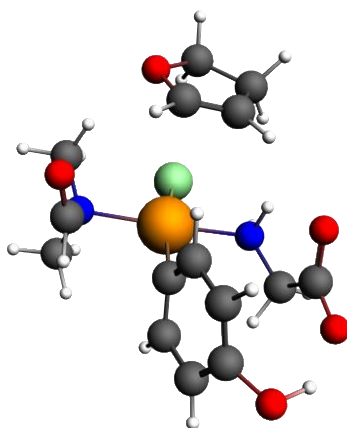

Compound E: Coordinates (Cartesian)

=====

| Atom  | bohr      |           |            | angstrom  |           |           | Geometric Variables   |    |    |
|-------|-----------|-----------|------------|-----------|-----------|-----------|-----------------------|----|----|
|       | X         | Y         | Z          | X         | Y         | Z         | (0:frozen, *:LT par.) |    |    |
| 1 Pd  | -0.668986 | 1.132952  | -0.111027  | -0.354012 | 0.599533  | -0.058753 | 1                     | 2  | 3  |
| 2 C   | 4.755917  | -0.868769 | -1.859966  | 2.516723  | -0.459733 | -0.984252 | 4                     | 5  | 6  |
| 3 C   | 4.651418  | -3.349158 | -3.438470  | 2.461425  | -1.772298 | -1.819560 | 7                     | 8  | 9  |
| 4 N   | 2.723830  | -0.909281 | 0.091892   | 1.441389  | -0.481171 | 0.048627  | 10                    | 11 | 12 |
| 5 O   | 3.418843  | -5.158152 | -2.419881  | 1.809174  | -2.729577 | -1.280546 | 13                    | 14 | 15 |
| 6 O   | 5.826921  | -3.320844 | -5.545460  | 3.083474  | -1.757315 | -2.934531 | 16                    | 17 | 18 |
| 7 H   | 4.583259  | 0.752126  | -3.100739  | 2.425356  | 0.398008  | -1.640840 | 19                    | 20 | 21 |
| 8 H   | 3.354715  | -0.356145 | 1.829104   | 1.775239  | -0.188464 | 0.967920  | 22                    | 23 | 24 |
| 9 H   | 2.166070  | -2.781413 | 0.137624   | 1.146235  | -1.471860 | 0.072827  | 25                    | 26 | 27 |
| 10 Cl | 0.015653  | 2.022192  | 4.478561   | 0.008283  | 1.070098  | 2.369953  | 28                    | 29 | 30 |
| 11 H  | 6.604789  | -0.812767 | -0.931407  | 3.495104  | -0.430098 | -0.492879 | 31                    | 32 | 33 |
| 12 C  | -0.463107 | 0.660936  | -3.863514  | -0.245066 | 0.349752  | -2.044483 | 34                    | 35 | 36 |
| 13 C  | 0.878720  | 2.453908  | -5.274394  | 0.464998  | 1.298552  | -2.791089 | 37                    | 38 | 39 |
| 14 C  | 2.095540  | 1.751062  | -7.510617  | 1.108912  | 0.926622  | -3.974447 | 40                    | 41 | 42 |
| 15 C  | 1.949866  | -0.742876 | -8.315508  | 1.031825  | -0.393113 | -4.400377 | 43                    | 44 | 45 |
| 16 C  | 0.288160  | -2.411227 | -7.160041  | 0.152488  | -1.275966 | -3.788930 | 46                    | 47 | 48 |
| 17 C  | -0.911342 | -1.710421 | -4.925026  | -0.482261 | -0.905116 | -2.606212 | 49                    | 50 | 51 |
| 18 H  | 1.194191  | 4.342724  | -4.537962  | 0.631939  | 2.298071  | -2.401386 | 52                    | 53 | 54 |
| 19 H  | 3.333672  | 3.039273  | -8.508717  | 1.764103  | 1.608314  | -4.502619 | 55                    | 56 | 57 |
| 20 O  | 3.733904  | -1.673331 | -10.059474 | 1.975897  | -0.885488 | -5.323245 | 58                    | 59 | 60 |
| 21 H  | 0.164993  | -4.328721 | -7.858692  | 0.087310  | -2.290661 | -4.158641 | 61                    | 62 | 63 |

|      |           |           |           |           |           |           |     |     |     |
|------|-----------|-----------|-----------|-----------|-----------|-----------|-----|-----|-----|
| 22 H | -2.010640 | -3.105506 | -3.916232 | -1.063985 | -1.643363 | -2.072381 | 64  | 65  | 66  |
| 23 H | 4.973596  | -2.626346 | -8.978850 | 2.631914  | -1.389803 | -4.751403 | 67  | 68  | 69  |
| 24 C | -5.363748 | 1.997169  | -2.511659 | -2.838373 | 1.056856  | -1.329113 | 70  | 71  | 72  |
| 25 C | -5.767565 | 2.601895  | 2.028385  | -3.052064 | 1.376864  | 1.073375  | 73  | 74  | 75  |
| 26 O | -6.988626 | 0.334596  | -2.433663 | -3.698221 | 0.177061  | -1.287839 | 76  | 77  | 78  |
| 27 H | -4.664983 | 2.800169  | -4.274073 | -2.468603 | 1.481785  | -2.261742 | 79  | 80  | 81  |
| 28 H | -6.049750 | 0.579213  | 2.271185  | -3.201390 | 0.306506  | 1.201859  | 82  | 83  | 84  |
| 29 H | -7.608947 | 3.536498  | 1.856438  | -4.026481 | 1.871434  | 0.982384  | 85  | 86  | 87  |
| 30 H | -4.711925 | 3.334489  | 3.628006  | -2.493443 | 1.764535  | 1.919858  | 88  | 89  | 90  |
| 31 H | -2.380562 | 6.317675  | 0.995796  | -1.259739 | 3.343170  | 0.526953  | 91  | 92  | 93  |
| 32 H | -2.513043 | 6.038202  | -2.344482 | -1.329845 | 3.195279  | -1.240646 | 94  | 95  | 96  |
| 33 H | -5.270516 | 6.967833  | -0.626533 | -2.789037 | 3.687218  | -0.331547 | 97  | 98  | 99  |
| 34 N | -4.273213 | 3.083831  | -0.300410 | -2.261287 | 1.631893  | -0.158970 | 100 | 101 | 102 |
| 35 C | -3.568952 | 5.784370  | -0.595216 | -1.888608 | 3.060957  | -0.314975 | 103 | 104 | 105 |
| 36 O | -5.342903 | -3.437599 | 3.107794  | -2.827343 | -1.819099 | 1.644574  | 106 | 107 | 108 |
| 37 H | -0.840420 | -7.084321 | 4.678754  | -0.444731 | -3.748861 | 2.475890  | 109 | 110 | 111 |
| 38 C | -4.235482 | -4.337099 | 0.862237  | -2.241320 | -2.295094 | 0.456276  | 112 | 113 | 114 |
| 39 C | -3.481721 | -3.905009 | 5.182727  | -1.842447 | -2.066442 | 2.742581  | 115 | 116 | 117 |
| 40 C | -1.943196 | -5.318084 | 1.159657  | -1.028295 | -2.814209 | 0.613664  | 118 | 119 | 120 |
| 41 C | -1.180817 | -5.190058 | 3.921416  | -0.624861 | -2.746461 | 2.075124  | 121 | 122 | 123 |
| 42 H | -4.437139 | -5.104783 | 6.554861  | -2.348033 | -2.701335 | 3.468683  | 124 | 125 | 126 |
| 43 H | -5.406821 | -4.071373 | -0.781961 | -2.861166 | -2.154478 | -0.413796 | 127 | 128 | 129 |
| 44 H | -0.736697 | -6.074510 | -0.307599 | -0.389843 | -3.214492 | -0.162775 | 130 | 131 | 132 |
| 45 H | 0.532143  | -4.070816 | 4.202763  | 0.281598  | -2.154183 | 2.224006  | 133 | 134 | 135 |
| 46 H | -3.014023 | -2.070461 | 5.982734  | -1.594952 | -1.095641 | 3.165926  | 136 | 137 | 138 |

---

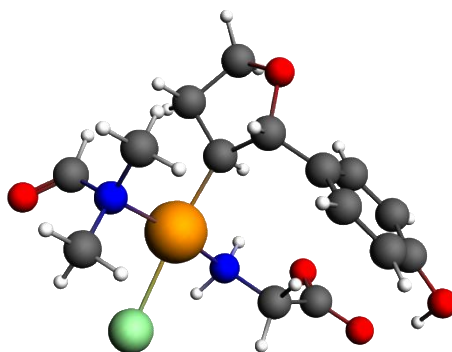

Compound F: Coordinates (Cartesian)

=====

| Atom  | bohr      |           |           | angstrom  |           |           | Geometric Variables   |    |    |
|-------|-----------|-----------|-----------|-----------|-----------|-----------|-----------------------|----|----|
|       | X         | Y         | Z         | X         | Y         | Z         | (0:frozen, *:LT par.) |    |    |
| 1 Pd  | -0.456903 | 0.444844  | -0.203521 | -0.241783 | 0.235401  | -0.107699 | 1                     | 2  | 3  |
| 2 C   | 3.794581  | -3.305745 | -1.044519 | 2.008006  | -1.749325 | -0.552736 | 4                     | 5  | 6  |
| 3 C   | 4.301124  | -6.054439 | -1.920082 | 2.276057  | -3.203871 | -1.016064 | 7                     | 8  | 9  |
| 4 N   | 1.177770  | -3.081370 | -0.017596 | 0.623249  | -1.630591 | -0.009312 | 10                    | 11 | 12 |
| 5 O   | 2.444534  | -7.576182 | -1.785161 | 1.293592  | -4.009143 | -0.944666 | 13                    | 14 | 15 |
| 6 O   | 6.531708  | -6.486940 | -2.763653 | 3.456431  | -3.432741 | -1.462462 | 16                    | 17 | 18 |
| 7 H   | 4.011229  | -2.051541 | -2.657934 | 2.122651  | -1.085629 | -1.406518 | 19                    | 20 | 21 |
| 8 H   | 1.234303  | -3.387038 | 1.890720  | 0.653165  | -1.792343 | 1.000526  | 22                    | 23 | 24 |
| 9 H   | 0.182871  | -4.546779 | -0.821063 | 0.096771  | -2.406052 | -0.434488 | 25                    | 26 | 27 |
| 10 Cl | 1.996030  | 1.031320  | 3.762863  | 1.056253  | 0.545751  | 1.991221  | 28                    | 29 | 30 |
| 11 H  | 5.143794  | -2.739874 | 0.402897  | 2.721978  | -1.449879 | 0.213204  | 31                    | 32 | 33 |
| 12 C  | 1.005983  | -0.994278 | -6.811203 | 0.532343  | -0.526149 | -3.604333 | 34                    | 35 | 36 |
| 13 C  | 3.211181  | 0.447355  | -6.931099 | 1.699284  | 0.236730  | -3.667780 | 37                    | 38 | 39 |
| 14 C  | 5.567202  | -0.710835 | -7.161890 | 2.946036  | -0.376158 | -3.789909 | 40                    | 41 | 42 |
| 15 C  | 5.717143  | -3.333841 | -7.276330 | 3.025382  | -1.764193 | -3.850468 | 43                    | 44 | 45 |
| 16 C  | 3.507238  | -4.765424 | -7.438507 | 1.855951  | -2.521754 | -3.936289 | 46                    | 47 | 48 |
| 17 C  | 1.173812  | -3.600545 | -7.196461 | 0.621154  | -1.905326 | -3.808203 | 49                    | 50 | 51 |
| 18 H  | 3.104003  | 2.485406  | -6.744270 | 1.642568  | 1.315220  | -3.568914 | 52                    | 53 | 54 |
| 19 H  | 7.304382  | 0.366627  | -7.123920 | 3.865313  | 0.194010  | -3.769816 | 55                    | 56 | 57 |
| 20 O  | 8.047372  | -4.524958 | -7.028853 | 4.258486  | -2.394505 | -3.719509 | 58                    | 59 | 60 |
| 21 H  | 3.653214  | -6.797779 | -7.602264 | 1.933197  | -3.597230 | -4.022945 | 61                    | 62 | 63 |
| 22 H  | -0.532923 | -4.727036 | -7.252197 | -0.282011 | -2.501440 | -3.837697 | 64                    | 65 | 66 |
| 23 H  | 7.926127  | -5.586908 | -5.416777 | 4.194326  | -2.956464 | -2.866435 | 67                    | 68 | 69 |
| 24 C  | -4.346646 | 3.552664  | 1.310311  | -2.300146 | 1.879989  | 0.693386  | 70                    | 71 | 72 |



|      |           |           |           |           |           |           |     |     |     |
|------|-----------|-----------|-----------|-----------|-----------|-----------|-----|-----|-----|
| 25 C | -0.465172 | 5.996890  | 1.580333  | -0.246158 | 3.173418  | 0.836276  | 73  | 74  | 75  |
| 26 O | -4.780803 | 4.003170  | 3.548657  | -2.529892 | 2.118386  | 1.877868  | 76  | 77  | 78  |
| 27 H | -5.690510 | 2.582456  | 0.089326  | -3.011288 | 1.366577  | 0.047269  | 79  | 80  | 81  |
| 28 H | -0.252559 | 5.232100  | 3.468716  | -0.133649 | 2.768708  | 1.835565  | 82  | 83  | 84  |
| 29 H | -1.343428 | 7.870552  | 1.665638  | -0.710912 | 4.164917  | 0.881418  | 85  | 86  | 87  |
| 30 H | 1.385075  | 6.103463  | 0.696644  | 0.732950  | 3.229813  | 0.368648  | 88  | 89  | 90  |
| 31 H | -0.703809 | 5.527586  | -3.455694 | -0.372440 | 2.925073  | -1.828675 | 91  | 92  | 93  |
| 32 H | -3.759589 | 4.172775  | -3.599006 | -1.989489 | 2.208137  | -1.904512 | 94  | 95  | 96  |
| 33 H | -3.354170 | 7.259701  | -2.323775 | -1.774951 | 3.841668  | -1.229689 | 97  | 98  | 99  |
| 34 N | -2.087286 | 4.292779  | 0.051896  | -1.104544 | 2.271641  | 0.027462  | 100 | 101 | 102 |
| 35 C | -2.514459 | 5.373375  | -2.500288 | -1.330594 | 2.843467  | -1.323095 | 103 | 104 | 105 |
| 36 O | -3.542268 | -0.503927 | -7.812288 | -1.874488 | -0.266667 | -4.134085 | 106 | 107 | 108 |
| 37 C | -1.445640 | 0.173696  | -6.016154 | -0.765000 | 0.091916  | -3.183612 | 109 | 110 | 111 |
| 38 C | -2.359934 | -0.794635 | -3.427678 | -1.248823 | -0.420503 | -1.813849 | 112 | 113 | 114 |
| 39 C | -5.256173 | -0.695871 | -3.641535 | -2.781447 | -0.368239 | -1.927017 | 115 | 116 | 117 |
| 40 C | -5.657978 | -1.589353 | -6.365857 | -2.994073 | -0.841049 | -3.368667 | 118 | 119 | 120 |
| 41 H | -6.179290 | -1.918350 | -2.257942 | -3.269939 | -1.015147 | -1.194851 | 121 | 122 | 123 |
| 42 H | -1.283356 | 2.223964  | -6.116141 | -0.679123 | 1.176871  | -3.236522 | 124 | 125 | 126 |
| 43 H | -7.394691 | -0.905076 | -7.237683 | -3.913102 | -0.478946 | -3.830017 | 127 | 128 | 129 |
| 44 H | -1.902494 | -2.812548 | -3.405861 | -1.006756 | -1.488336 | -1.802304 | 130 | 131 | 132 |
| 45 H | -6.033731 | 1.209639  | -3.461275 | -3.192913 | 0.640113  | -1.831628 | 133 | 134 | 135 |
| 46 H | -5.584428 | -3.652024 | -6.487235 | -2.955152 | -1.932568 | -3.432897 | 136 | 137 | 13  |

---

-----

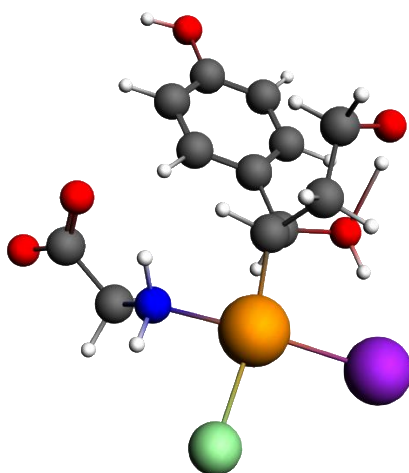

Compound **G**: Coordinates (Cartesian)

=====

| Atom  | bohr      |           |            | angstrom  |           |           | Geometric Variables   |    |    |
|-------|-----------|-----------|------------|-----------|-----------|-----------|-----------------------|----|----|
|       | X         | Y         | Z          | X         | Y         | Z         | (0:frozen, *:LT par.) |    |    |
| 1 Pd  | -0.179924 | 0.985276  | 0.424943   | -0.095212 | 0.521386  | 0.224870  | 1                     | 2  | 3  |
| 2 C   | 4.130186  | -2.808720 | 1.042423   | 2.185600  | -1.486311 | 0.551627  | 4                     | 5  | 6  |
| 3 C   | 4.660735  | -5.589026 | 0.270168   | 2.466355  | -2.957585 | 0.142967  | 7                     | 8  | 9  |
| 4 N   | 1.408174  | -2.425529 | 1.638955   | 0.745174  | -1.283534 | 0.867298  | 10                    | 11 | 12 |
| 5 O   | 2.701863  | -6.856533 | -0.425777  | 1.429764  | -3.628321 | -0.225312 | 13                    | 14 | 15 |
| 6 O   | 6.957743  | -6.291294 | 0.305748   | 3.681879  | -3.329210 | 0.161795  | 16                    | 17 | 18 |
| 7 H   | 4.686055  | -1.597162 | -0.532766  | 2.479754  | -0.845182 | -0.281928 | 19                    | 20 | 21 |
| 8 H   | 1.142709  | -2.229394 | 3.544101   | 0.604696  | -1.179745 | 1.875457  | 22                    | 23 | 24 |
| 9 H   | 0.495936  | -4.005959 | 0.968772   | 0.262438  | -2.119862 | 0.512652  | 25                    | 26 | 27 |
| 10 Cl | 0.344563  | 2.186262  | 5.042908   | 0.182335  | 1.156920  | 2.668592  | 28                    | 29 | 30 |
| 11 H  | 5.281848  | -2.292449 | 2.668549   | 2.795033  | -1.213112 | 1.412135  | 31                    | 32 | 33 |
| 12 C  | 2.151072  | -1.510334 | -7.006905  | 1.138298  | -0.799234 | -3.707894 | 34                    | 35 | 36 |
| 13 C  | 2.931808  | -3.922921 | -6.262467  | 1.551446  | -2.075920 | -3.313955 | 37                    | 38 | 39 |
| 14 C  | 3.881148  | -5.634827 | -8.023728  | 2.053815  | -2.981822 | -4.245974 | 40                    | 41 | 42 |
| 15 C  | 4.046966  | -4.943346 | -10.547568 | 2.141562  | -2.615906 | -5.581533 | 43                    | 44 | 45 |
| 16 C  | 3.283737  | -2.562253 | -11.332521 | 1.737679  | -1.355886 | -5.996912 | 46                    | 47 | 48 |
| 17 C  | 2.352512  | -0.855274 | -9.558973  | 1.244896  | -0.452592 | -5.058391 | 49                    | 50 | 51 |
| 18 H  | 2.814856  | -4.552096 | -4.316654  | 1.489558  | -2.408866 | -2.284275 | 52                    | 53 | 54 |
| 19 H  | 4.488411  | -7.481467 | -7.373671  | 2.375165  | -3.959022 | -3.901979 | 55                    | 56 | 57 |
| 20 O  | 4.992776  | -6.603150 | -12.424839 | 2.642063  | -3.494236 | -6.574942 | 58                    | 59 | 60 |
| 21 H  | 3.425518  | -2.079460 | -13.314914 | 1.812706  | -1.100403 | -7.045949 | 61                    | 62 | 63 |
| 22 H  | 1.769966  | 1.014334  | -10.137979 | 0.936626  | 0.536763  | -5.364788 | 64                    | 65 | 66 |

|      |           |           |            |           |           |           |     |     |     |
|------|-----------|-----------|------------|-----------|-----------|-----------|-----|-----|-----|
| 23 H | 5.510810  | -8.212643 | -11.664341 | 2.916195  | -4.345944 | -6.172503 | 67  | 68  | 69  |
| 24 H | -2.686931 | -3.402411 | -6.920601  | -1.421863 | -1.800478 | -3.662224 | 70  | 71  | 72  |
| 25 O | -3.904355 | 0.023651  | -8.540601  | -2.066096 | 0.012516  | -4.519491 | 73  | 74  | 75  |
| 26 C | 1.232739  | 0.398553  | -5.060547  | 0.652338  | 0.210905  | -2.677926 | 76  | 77  | 78  |
| 27 C | -0.622700 | -0.668070 | -3.095191  | -0.329519 | -0.353527 | -1.637905 | 79  | 80  | 81  |
| 28 C | -3.411770 | -0.693313 | -3.893445  | -1.805431 | -0.366885 | -2.060323 | 82  | 83  | 84  |
| 29 C | -3.989615 | -1.846776 | -6.499688  | -2.111213 | -0.977272 | -3.439487 | 85  | 86  | 87  |
| 30 H | -4.423016 | -1.776088 | -2.444693  | -2.340560 | -0.939865 | -1.293676 | 88  | 89  | 90  |
| 31 H | 2.910243  | 1.124944  | -4.083181  | 1.540034  | 0.595295  | -2.160726 | 91  | 92  | 93  |
| 32 H | -5.923308 | -2.568906 | -6.543123  | -3.134480 | -1.359406 | -3.462471 | 94  | 95  | 96  |
| 33 H | -0.071018 | -2.628207 | -2.744617  | -0.037581 | -1.390787 | -1.452389 | 97  | 98  | 99  |
| 34 H | -4.221440 | 1.208290  | -3.861894  | -2.233890 | 0.639399  | -2.043626 | 100 | 101 | 102 |
| 35 I | -1.789159 | 5.640487  | -1.079724  | -0.946782 | 2.984817  | -0.571365 | 103 | 104 | 105 |
| 36 H | -0.380411 | 3.841735  | -5.250275  | -0.201305 | 2.032959  | -2.778326 | 106 | 107 | 108 |
| 37 O | 0.128278  | 2.520410  | -6.486541  | 0.067882  | 1.333743  | -3.432529 | 109 | 110 | 111 |
| 38 H | -2.462008 | 1.179722  | -8.187910  | -1.302838 | 0.624282  | -4.332855 | 112 | 113 | 114 |

---

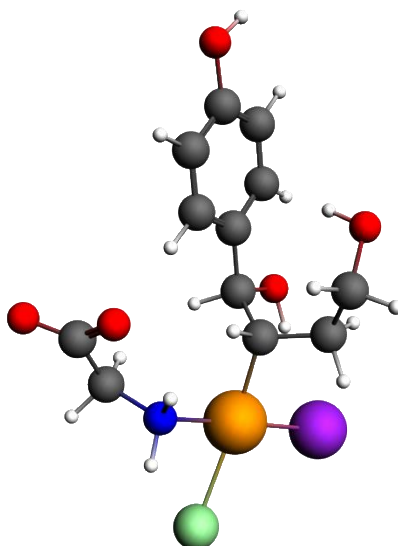

Compound I: Coordinates (Cartesian)

=====

| Atom  | bohr      |           |            | angstrom  |           |           | Geometric Variables   |    |    |
|-------|-----------|-----------|------------|-----------|-----------|-----------|-----------------------|----|----|
|       | X         | Y         | Z          | X         | Y         | Z         | (0:frozen, *:LT par.) |    |    |
| 1 Pd  | -0.325607 | 0.975521  | 0.411512   | -0.172304 | 0.516223  | 0.217763  | 1                     | 2  | 3  |
| 2 C   | 3.534753  | -3.282539 | 1.393766   | 1.870511  | -1.737045 | 0.737549  | 4                     | 5  | 6  |
| 3 C   | 3.893879  | -5.945432 | 0.217745   | 2.060552  | -3.146187 | 0.115225  | 7                     | 8  | 9  |
| 4 N   | 0.807653  | -2.631813 | 1.598984   | 0.427392  | -1.392696 | 0.846146  | 10                    | 11 | 12 |
| 5 O   | 1.952049  | -6.831112 | -0.955354  | 1.032980  | -3.614869 | -0.505551 | 13                    | 14 | 15 |
| 6 O   | 6.068781  | -6.932509 | 0.459078   | 3.211461  | -3.668526 | 0.242933  | 16                    | 17 | 18 |
| 7 H   | 4.508108  | -1.921998 | 0.188506   | 2.385588  | -1.017078 | 0.099753  | 19                    | 20 | 21 |
| 8 H   | 0.257635  | -2.502683 | 3.448073   | 0.136335  | -1.324363 | 1.824642  | 22                    | 23 | 24 |
| 9 H   | -0.139298 | -4.052277 | 0.669500   | -0.073713 | -2.144373 | 0.354284  | 25                    | 26 | 27 |
| 10 Cl | -0.435556 | 1.794950  | 5.158358   | -0.230486 | 0.949847  | 2.729685  | 28                    | 29 | 30 |
| 11 H  | 4.418619  | -3.219197 | 3.253029   | 2.338232  | -1.703526 | 1.721429  | 31                    | 32 | 33 |
| 12 C  | 2.593695  | -1.498412 | -6.908023  | 1.372524  | -0.792926 | -3.655569 | 34                    | 35 | 36 |
| 13 C  | 3.013838  | -0.467527 | -9.299635  | 1.594854  | -0.247405 | -4.921155 | 37                    | 38 | 39 |
| 14 C  | 3.558951  | -2.022172 | -11.362853 | 1.883316  | -1.070087 | -6.012963 | 40                    | 41 | 42 |
| 15 C  | 3.712073  | -4.616157 | -11.014474 | 1.964344  | -2.442765 | -5.828608 | 43                    | 44 | 45 |
| 16 C  | 3.338543  | -5.676497 | -8.642429  | 1.766681  | -3.003873 | -4.573376 | 46                    | 47 | 48 |
| 17 C  | 2.783855  | -4.125755 | -6.593258  | 1.473153  | -2.183255 | -3.489002 | 49                    | 50 | 51 |
| 18 H  | 2.907122  | 1.563553  | -9.492485  | 1.538383  | 0.827397  | -5.023207 | 52                    | 53 | 54 |
| 19 H  | 3.872671  | -1.191279 | -13.211919 | 2.049329  | -0.630398 | -6.991446 | 55                    | 56 | 57 |
| 20 O  | 4.262942  | -6.296498 | -13.025027 | 2.255852  | -3.331963 | -6.892548 | 58                    | 59 | 60 |

|      |           |           |            |           |           |           |     |     |     |
|------|-----------|-----------|------------|-----------|-----------|-----------|-----|-----|-----|
| 21 H | 3.497951  | -7.701464 | -8.414056  | 1.851036  | -4.075439 | -4.452526 | 61  | 62  | 63  |
| 22 H | 2.511342  | -5.003576 | -4.752990  | 1.328945  | -2.647778 | -2.515174 | 64  | 65  | 66  |
| 23 H | 4.373694  | -5.380274 | -14.632298 | 2.314459  | -2.847119 | -7.743078 | 67  | 68  | 69  |
| 24 H | -3.530112 | -3.688813 | -5.717249  | -1.868055 | -1.952036 | -3.025438 | 70  | 71  | 72  |
| 25 O | -3.141087 | -1.529632 | -9.045443  | -1.662191 | -0.809446 | -4.786643 | 73  | 74  | 75  |
| 26 C | 2.039823  | 0.208635  | -4.669533  | 1.079428  | 0.110405  | -2.471010 | 76  | 77  | 78  |
| 27 C | -0.403372 | -0.446603 | -3.248166  | -0.213455 | -0.236332 | -1.718855 | 79  | 80  | 81  |
| 28 C | -2.889930 | 0.214832  | -4.590820  | -1.529285 | 0.113684  | -2.429357 | 82  | 83  | 84  |
| 29 C | -3.960466 | -1.780342 | -6.399074  | -2.095788 | -0.942116 | -3.386244 | 85  | 86  | 87  |
| 30 H | -4.313195 | 0.519894  | -3.118964  | -2.282445 | 0.275116  | -1.650484 | 88  | 89  | 90  |
| 31 H | 3.627420  | -0.012055 | -3.354359  | 1.919548  | -0.006379 | -1.775051 | 91  | 92  | 93  |
| 32 H | -6.006612 | -1.571837 | -6.539442  | -3.178562 | -0.831780 | -3.460524 | 94  | 95  | 96  |
| 33 H | -0.369794 | -2.487517 | -2.901580  | -0.195686 | -1.316337 | -1.535450 | 97  | 98  | 99  |
| 34 H | -2.726296 | 2.006243  | -5.607823  | -1.442693 | 1.061658  | -2.967532 | 100 | 101 | 102 |
| 35 I | -1.511834 | 5.811937  | -0.894554  | -0.800028 | 3.075545  | -0.473378 | 103 | 104 | 105 |
| 36 H | 1.330536  | 3.923236  | -4.334940  | 0.704089  | 2.076087  | -2.293952 | 106 | 107 | 108 |
| 37 O | 2.057616  | 2.790923  | -5.637597  | 1.088844  | 1.476893  | -2.983288 | 109 | 110 | 111 |
| 38 H | -1.287202 | -1.571634 | -9.124523  | -0.681158 | -0.831673 | -4.828490 | 112 | 113 | 114 |

---

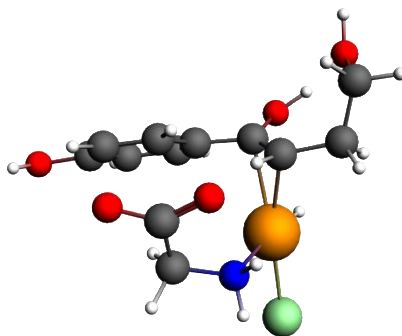

Structure K (X=Cl) Coordinates (Cartesian)

=====

| Atom  | bohr      |           |            | angstrom  |           |           | Geometric Variables   |    |    |
|-------|-----------|-----------|------------|-----------|-----------|-----------|-----------------------|----|----|
|       | X         | Y         | Z          | X         | Y         | Z         | (0:frozen, *:LT par.) |    |    |
| 1 Pd  | -2.350742 | 3.293786  | -7.221541  | -1.243959 | 1.742997  | -3.821475 | 1                     | 2  | 3  |
| 2 C   | 1.496148  | 5.853679  | -3.300682  | 0.791727  | 3.097633  | -1.746646 | 4                     | 5  | 6  |
| 3 C   | 1.500228  | 4.385233  | -0.774619  | 0.793886  | 2.320566  | -0.409911 | 7                     | 8  | 9  |
| 4 N   | -1.103486 | 6.006578  | -4.335222  | -0.583940 | 3.178544  | -2.294101 | 10                    | 11 | 12 |
| 5 O   | -0.670008 | 3.606845  | 0.007665   | -0.354553 | 1.908660  | 0.004056  | 13                    | 14 | 15 |
| 6 O   | 3.648020  | 4.044016  | 0.242856   | 1.930449  | 2.140001  | 0.128514  | 16                    | 17 | 18 |
| 7 H   | 2.742638  | 4.900623  | -4.637195  | 1.451341  | 2.593298  | -2.453898 | 19                    | 20 | 21 |
| 8 H   | -1.408704 | 7.626424  | -5.335617  | -0.745454 | 4.035730  | -2.823487 | 22                    | 23 | 24 |
| 9 H   | -2.312862 | 5.835820  | -2.831788  | -1.223914 | 3.088183  | -1.498518 | 25                    | 26 | 27 |
| 10 Cl | -2.584096 | 6.839398  | -10.060103 | -1.367445 | 3.619253  | -5.323577 | 28                    | 29 | 30 |
| 11 H  | 2.265047  | 7.739008  | -2.927478  | 1.198611  | 4.095307  | -1.549155 | 31                    | 32 | 33 |
| 12 C  | 1.291452  | -0.869604 | -6.008654  | 0.683407  | -0.460175 | -3.179643 | 34                    | 35 | 36 |
| 13 C  | 2.655277  | -1.245676 | -8.247630  | 1.405112  | -0.659183 | -4.364458 | 37                    | 38 | 39 |
| 14 C  | 5.259610  | -0.971208 | -8.271552  | 2.783266  | -0.513941 | -4.377117 | 40                    | 41 | 42 |
| 15 C  | 6.511349  | -0.331064 | -6.045958  | 3.445657  | -0.175192 | -3.199383 | 43                    | 44 | 45 |
| 16 C  | 5.202110  | -0.037047 | -3.794399  | 2.752838  | -0.019605 | -2.007910 | 46                    | 47 | 48 |
| 17 C  | 2.590903  | -0.339792 | -3.779171  | 1.371047  | -0.179810 | -1.999851 | 49                    | 50 | 51 |
| 18 H  | 1.633965  | -1.708572 | -9.956522  | 0.864657  | -0.904137 | -5.268765 | 52                    | 53 | 54 |
| 19 H  | 6.350401  | -1.195268 | -9.985719  | 3.360487  | -0.632509 | -5.284215 | 55                    | 56 | 57 |
| 20 O  | 9.142845  | -0.007671 | -6.213994  | 4.838185  | -0.004060 | -3.288304 | 58                    | 59 | 60 |
| 21 H  | 6.126807  | 0.519477  | -2.054564  | 3.242167  | 0.274896  | -1.087228 | 61                    | 62 | 63 |
| 22 H  | 1.593264  | -0.131592 | -2.007770  | 0.843119  | -0.069635 | -1.062466 | 64                    | 65 | 66 |
| 23 H  | 9.840131  | 0.677591  | -4.636944  | 5.207173  | 0.358566  | -2.453765 | 67                    | 68 | 69 |
| 24 H  | -5.419659 | -2.852765 | -1.197987  | -2.867960 | -1.509618 | -0.633947 | 70                    | 71 | 72 |

|      |           |           |           |           |           |           |     |     |     |
|------|-----------|-----------|-----------|-----------|-----------|-----------|-----|-----|-----|
| 25 O | -5.946532 | -4.688727 | -4.705419 | -3.146769 | -2.481167 | -2.490001 | 73  | 74  | 75  |
| 26 C | -1.491888 | -1.036307 | -6.057100 | -0.789473 | -0.548390 | -3.205279 | 76  | 77  | 78  |
| 27 C | -3.063451 | 0.292475  | -4.422680 | -1.621108 | 0.154771  | -2.340381 | 79  | 80  | 81  |
| 28 C | -5.873750 | -0.188146 | -4.261653 | -3.108255 | -0.099562 | -2.255170 | 82  | 83  | 84  |
| 29 C | -6.548762 | -2.630920 | -2.911376 | -3.465456 | -1.392223 | -1.540634 | 85  | 86  | 87  |
| 30 H | -3.397835 | 1.687196  | -9.421645 | -1.798057 | 0.892826  | -4.985720 | 88  | 89  | 90  |
| 31 H | -3.926190 | -3.707117 | -6.980603 | -2.077650 | -1.961722 | -3.693976 | 91  | 92  | 93  |
| 32 H | -8.565333 | -2.714487 | -2.474822 | -4.532579 | -1.436445 | -1.309620 | 94  | 95  | 96  |
| 33 O | -2.354488 | -2.906702 | -7.673227 | -1.245941 | -1.538161 | -4.060497 | 97  | 98  | 99  |
| 34 H | -6.736199 | -0.227606 | -6.142372 | -3.564643 | -0.120444 | -3.250403 | 100 | 101 | 102 |
| 35 H | -5.939377 | -6.355852 | -3.907585 | -3.142983 | -3.363372 | -2.067805 | 103 | 104 | 105 |
| 36 H | -6.727741 | 1.389100  | -3.237465 | -3.560167 | 0.735080  | -1.713193 | 106 | 107 | 108 |
| 37 H | -2.221584 | 1.226145  | -2.786535 | -1.175612 | 0.648848  | -1.474571 | 109 | 110 | 111 |

---

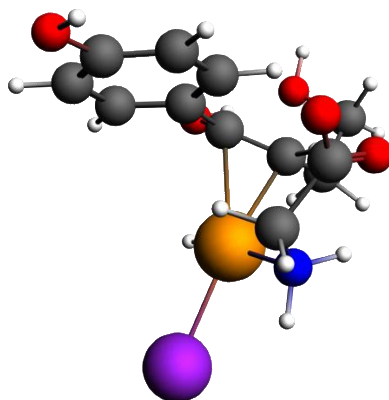

Structure K (X=I) Coordinates (Cartesian)

| Atom | bohr      |           |            | angstrom  |           |           | Geometric Variables   |    |    |
|------|-----------|-----------|------------|-----------|-----------|-----------|-----------------------|----|----|
|      | X         | Y         | Z          | X         | Y         | Z         | (0:frozen, *:LT par.) |    |    |
| 1 Pd | -2.431180 | 3.390216  | -7.173960  | -1.286525 | 1.794025  | -3.796296 | 1                     | 2  | 3  |
| 2 C  | 1.050476  | 6.018410  | -3.028715  | 0.555888  | 3.184805  | -1.602727 | 4                     | 5  | 6  |
| 3 C  | 1.056810  | 4.470429  | -0.548080  | 0.559240  | 2.365649  | -0.290031 | 7                     | 8  | 9  |
| 4 N  | -1.532238 | 6.074064  | -4.125898  | -0.810825 | 3.214256  | -2.183331 | 10                    | 11 | 12 |
| 5 O  | -1.093494 | 3.552936  | 0.135128   | -0.578652 | 1.880133  | 0.071506  | 13                    | 14 | 15 |
| 6 O  | 3.185619  | 4.208611  | 0.527492   | 1.685757  | 2.227101  | 0.279137  | 16                    | 17 | 18 |
| 7 H  | 2.378297  | 5.165879  | -4.355366  | 1.258541  | 2.733666  | -2.304760 | 19                    | 20 | 21 |
| 8 H  | -1.930735 | 7.756712  | -4.973948  | -1.021701 | 4.104675  | -2.632100 | 22                    | 23 | 24 |
| 9 H  | -2.750892 | 5.697266  | -2.663805  | -1.455709 | 3.014863  | -1.409625 | 25                    | 26 | 27 |
| 10 I | -2.771621 | 7.128506  | -10.520472 | -1.466679 | 3.772243  | -5.567194 | 28                    | 29 | 30 |
| 11 H | 1.714694  | 7.925569  | -2.579579  | 0.907377  | 4.194031  | -1.365055 | 31                    | 32 | 33 |
| 12 C | 1.256944  | -0.770894 | -5.864798  | 0.665146  | -0.407939 | -3.103518 | 34                    | 35 | 36 |
| 13 C | 2.732431  | -1.101145 | -8.039083  | 1.445940  | -0.582701 | -4.254100 | 37                    | 38 | 39 |
| 14 C | 5.322888  | -0.723487 | -7.949346  | 2.816751  | -0.382853 | -4.206613 | 40                    | 41 | 42 |
| 15 C | 6.448750  | -0.022899 | -5.675447  | 3.412532  | -0.012118 | -3.003317 | 43                    | 44 | 45 |
| 16 C | 5.029632  | 0.227653  | -3.485055  | 2.661566  | 0.120469  | -1.844211 | 46                    | 47 | 48 |
| 17 C | 2.435115  | -0.180179 | -3.582863  | 1.288608  | -0.095347 | -1.895970 | 49                    | 50 | 51 |
| 18 H | 1.807693  | -1.610996 | -9.788937  | 0.956590  | -0.852503 | -5.180082 | 52                    | 53 | 54 |
| 19 H | 6.496372  | -0.912165 | -9.612612  | 3.437732  | -0.482697 | -5.086775 | 55                    | 56 | 57 |
| 20 O | 9.069472  | 0.402449  | -5.727909  | 4.799358  | 0.212967  | -3.031079 | 58                    | 59 | 60 |
| 21 H | 5.853411  | 0.826697  | -1.708438  | 3.097491  | 0.437469  | -0.904066 | 61                    | 62 | 63 |
| 22 H | 1.352977  | -0.008705 | -1.857478  | 0.715964  | -0.004606 | -0.982935 | 64                    | 65 | 66 |
| 23 H | 9.670437  | 1.112377  | -4.122519  | 5.117375  | 0.588645  | -2.181543 | 67                    | 68 | 69 |



|      |           |           |           |           |           |           |     |     |     |
|------|-----------|-----------|-----------|-----------|-----------|-----------|-----|-----|-----|
| 24 H | -5.753772 | -3.027473 | -1.492158 | -3.044765 | -1.602070 | -0.789616 | 70  | 71  | 72  |
| 25 O | -5.991040 | -4.778312 | -5.072360 | -3.170322 | -2.528574 | -2.684178 | 73  | 74  | 75  |
| 26 C | -1.513278 | -1.037787 | -6.036761 | -0.800792 | -0.549173 | -3.194516 | 76  | 77  | 78  |
| 27 C | -3.199176 | 0.224533  | -4.477482 | -1.692931 | 0.118818  | -2.369382 | 79  | 80  | 81  |
| 28 C | -6.007806 | -0.288607 | -4.513391 | -3.179194 | -0.152724 | -2.388384 | 82  | 83  | 84  |
| 29 C | -6.752336 | -2.773426 | -3.280332 | -3.573182 | -1.467634 | -1.735877 | 85  | 86  | 87  |
| 30 H | -3.214537 | 1.780951  | -9.481436 | -1.701060 | 0.942438  | -5.017360 | 88  | 89  | 90  |
| 31 H | -3.841055 | -3.721232 | -7.170602 | -2.032599 | -1.969191 | -3.794519 | 91  | 92  | 93  |
| 32 H | -8.795328 | -2.887761 | -3.002076 | -4.654287 | -1.528137 | -1.588630 | 94  | 95  | 96  |
| 33 O | -2.242290 | -2.879373 | -7.743558 | -1.186569 | -1.523699 | -4.097714 | 97  | 98  | 99  |
| 34 H | -6.741180 | -0.282158 | -6.449117 | -3.567279 | -0.149312 | -3.412726 | 100 | 101 | 102 |
| 35 H | -6.023363 | -6.464859 | -4.317822 | -3.187426 | -3.421056 | -2.284893 | 103 | 104 | 105 |
| 36 H | -6.948098 | 1.251065  | -3.507748 | -3.676775 | 0.662035  | -1.856220 | 106 | 107 | 108 |
| 37 H | -2.470200 | 1.161016  | -2.790673 | -1.307174 | 0.614383  | -1.476760 | 109 | 110 | 111 |

---

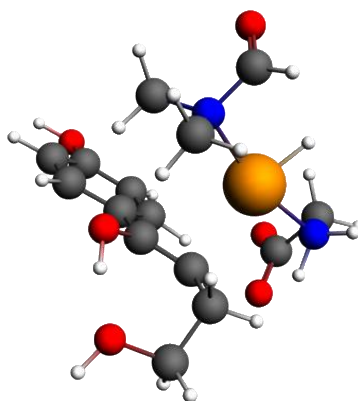

Structure K (X=DFM) Coordinates (Cartesian)

=====

| Atom | bohr      |           |            | angstrom  |           |           | Geometric Variables   |    |    |
|------|-----------|-----------|------------|-----------|-----------|-----------|-----------------------|----|----|
|      | X         | Y         | Z          | X         | Y         | Z         | (0:frozen, *:LT par.) |    |    |
| 1 Pd | -1.066763 | -0.217799 | -0.386557  | -0.564507 | -0.115254 | -0.204557 | 1                     | 2  | 3  |
| 2 C  | 0.557224  | -5.145840 | 1.906841   | 0.294870  | -2.723061 | 1.009057  | 4                     | 5  | 6  |
| 3 C  | 0.810987  | -6.920479 | -0.408985  | 0.429156  | -3.662160 | -0.216425 | 7                     | 8  | 9  |
| 4 N  | -1.771033 | -3.591668 | 1.490128   | -0.937190 | -1.900629 | 0.788542  | 10                    | 11 | 12 |
| 5 O  | -1.249221 | -7.124191 | -1.719437  | -0.661059 | -3.769959 | -0.909887 | 13                    | 14 | 15 |
| 6 O  | 2.931913  | -7.906014 | -0.809661  | 1.551502  | -4.183683 | -0.428454 | 16                    | 17 | 18 |
| 7 H  | 2.227338  | -3.968592 | 2.091920   | 1.178657  | -2.100089 | 1.106996  | 19                    | 20 | 21 |
| 8 H  | -2.680561 | -3.187128 | 3.135406   | -1.418492 | -1.686556 | 1.659185  | 22                    | 23 | 24 |
| 9 H  | -2.847545 | -4.757411 | 0.333358   | -1.506856 | -2.517513 | 0.176405  | 25                    | 26 | 27 |
| 10 H | -8.012333 | -0.656993 | -9.250796  | -4.239944 | -0.347666 | -4.895311 | 28                    | 29 | 30 |
| 11 H | 0.341930  | -6.316243 | 3.598459   | 0.180941  | -3.342412 | 1.904222  | 31                    | 32 | 33 |
| 12 C | 0.921146  | -1.478106 | -6.601410  | 0.487450  | -0.782180 | -3.493316 | 34                    | 35 | 36 |
| 13 C | 2.124737  | 0.000173  | -8.435355  | 1.124362  | 0.000092  | -4.463797 | 37                    | 38 | 39 |
| 14 C | 4.580755  | -0.537692 | -9.191654  | 2.424031  | -0.284535 | -4.864014 | 40                    | 41 | 42 |
| 15 C | 5.843979  | -2.587292 | -8.127264  | 3.092501  | -1.369136 | -4.300763 | 43                    | 44 | 45 |
| 16 C | 4.644622  | -4.139731 | -6.370989  | 2.457828  | -2.190651 | -3.371382 | 46                    | 47 | 48 |
| 17 C | 2.198067  | -3.596454 | -5.633321  | 1.163167  | -1.903162 | -2.981025 | 49                    | 50 | 51 |
| 18 H | 1.109507  | 1.556997  | -9.284084  | 0.587126  | 0.823927  | -4.912925 | 52                    | 53 | 54 |
| 19 H | 5.484447  | 0.621797  | -10.617869 | 2.902245  | 0.329041  | -5.618734 | 55                    | 56 | 57 |
| 20 O | 8.312476  | -3.230841 | -8.758532  | 4.398773  | -1.709687 | -4.634815 | 58                    | 59 | 60 |
| 21 H | 5.627350  | -5.761332 | -5.606347  | 2.977866  | -3.048766 | -2.966751 | 61                    | 62 | 63 |
| 22 H | 1.274999  | -4.905646 | -4.368452  | 0.674700  | -2.595956 | -2.311685 | 64                    | 65 | 66 |

|      |           |           |            |           |           |           |     |     |     |
|------|-----------|-----------|------------|-----------|-----------|-----------|-----|-----|-----|
| 23 H | 9.072978  | -2.096117 | -10.014591 | 4.801213  | -1.109217 | -5.299493 | 67  | 68  | 69  |
| 24 H | -7.092440 | -4.122071 | -6.447593  | -3.753157 | -2.181306 | -3.411919 | 70  | 71  | 72  |
| 25 O | -7.083759 | -0.334103 | -7.685641  | -3.748564 | -0.176800 | -4.067066 | 73  | 74  | 75  |
| 26 C | -1.638839 | -0.810381 | -5.768997  | -0.867236 | -0.428835 | -3.052822 | 76  | 77  | 78  |
| 27 C | -3.049695 | -2.136689 | -4.051142  | -1.613829 | -1.130687 | -2.143772 | 79  | 80  | 81  |
| 28 C | -5.803431 | -1.564066 | -3.526583  | -3.071043 | -0.827668 | -1.866187 | 82  | 83  | 84  |
| 29 C | -7.549444 | -2.252380 | -5.708714  | -3.994993 | -1.191908 | -3.020921 | 85  | 86  | 87  |
| 30 H | -6.401121 | -2.652245 | -1.875371  | -3.387327 | -1.403508 | -0.992403 | 88  | 89  | 90  |
| 31 H | 2.628794  | 5.717955  | -3.427039  | 1.391098  | 3.025812  | -1.813511 | 91  | 92  | 93  |
| 32 H | -9.529107 | -2.142065 | -5.140884  | -5.042586 | -1.133532 | -2.720439 | 94  | 95  | 96  |
| 33 H | 0.790306  | 3.520758  | -5.208966  | 0.418212  | 1.863105  | -2.756466 | 97  | 98  | 99  |
| 34 H | -6.125587 | 0.432828  | -3.084657  | -3.241521 | 0.229043  | -1.632330 | 100 | 101 | 102 |
| 35 H | -0.281498 | 0.529115  | 2.335535   | -0.148962 | 0.279996  | 1.235912  | 103 | 104 | 105 |
| 36 H | -4.431478 | 1.065020  | -7.380626  | -2.345037 | 0.563584  | -3.905659 | 106 | 107 | 108 |
| 37 O | -2.591112 | 1.337673  | -6.922024  | -1.371158 | 0.707866  | -3.662978 | 109 | 110 | 111 |
| 38 C | 0.900526  | 4.498077  | 1.008156   | 0.476538  | 2.380280  | 0.533493  | 112 | 113 | 114 |
| 39 O | 3.165164  | 4.829732  | 1.354859   | 1.674932  | 2.555784  | 0.716960  | 115 | 116 | 117 |
| 40 H | -0.538651 | 4.913395  | 2.426906   | -0.285042 | 2.600057  | 1.284263  | 118 | 119 | 120 |
| 41 N | -0.123643 | 3.660174  | -1.363182  | -0.065429 | 1.936881  | -0.721365 | 121 | 122 | 123 |
| 42 C | -2.537708 | 4.972314  | -1.990043  | -1.342897 | 2.631235  | -1.053085 | 124 | 125 | 126 |
| 43 H | 3.244144  | 2.438165  | -3.170467  | 1.716727  | 1.290221  | -1.677739 | 127 | 128 | 129 |
| 44 H | -2.184506 | 6.985093  | -2.321054  | -1.155991 | 3.696352  | -1.228249 | 130 | 131 | 132 |
| 45 H | -3.874432 | 4.747906  | -0.439563  | -2.050261 | 2.512484  | -0.232607 | 133 | 134 | 135 |
| 46 H | -3.295095 | 4.134467  | -3.704125  | -1.743689 | 2.187866  | -1.960139 | 136 | 137 | 138 |
| 47 C | 1.765117  | 3.838956  | -3.438277  | 0.934060  | 2.031488  | -1.819458 | 139 | 140 | 141 |
| 48 H | -2.428398 | -4.044129 | -3.578624  | -1.285053 | -2.140061 | -1.893726 | 142 | 143 | 144 |

---

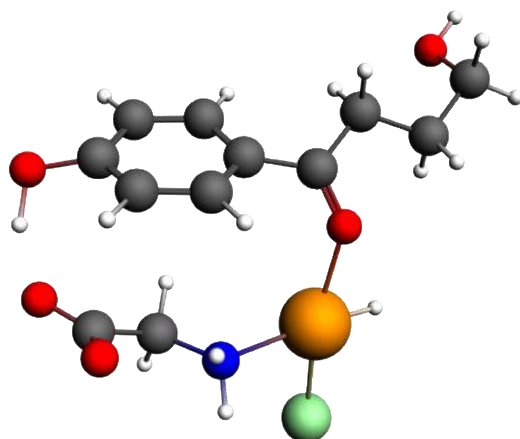

Structure **M** (X=Cl) Coordinates (Cartesian)

| Atom  | bohr      |           |           | angstrom |           |           | Geometric Variables   |    |    |
|-------|-----------|-----------|-----------|----------|-----------|-----------|-----------------------|----|----|
|       | X         | Y         | Z         | X        | Y         | Z         | (0:frozen, *:LT par.) |    |    |
| 1 Pd  | 0.372885  | -1.729978 | 2.465157  | 0.197322 | -0.915465 | 1.304505  | 1                     | 2  | 3  |
| 2 C   | 6.265143  | -1.496083 | 1.697448  | 3.315371 | -0.791693 | 0.898251  | 4                     | 5  | 6  |
| 3 C   | 8.640158  | -3.109200 | 1.192946  | 4.572175 | -1.645318 | 0.631280  | 7                     | 8  | 9  |
| 4 N   | 4.308077  | -2.937670 | 3.100944  | 2.279736 | -1.554548 | 1.640949  | 10                    | 11 | 12 |
| 5 O   | 8.735372  | -5.294168 | 2.161501  | 4.622560 | -2.801553 | 1.143817  | 13                    | 14 | 15 |
| 6 O   | 10.289572 | -2.098149 | -0.307880 | 5.445007 | -1.110293 | -0.162923 | 16                    | 17 | 18 |
| 7 H   | 5.514937  | -0.873604 | -0.119935 | 2.918379 | -0.462291 | -0.063467 | 19                    | 20 | 21 |
| 8 H   | 4.438620  | -2.548475 | 4.987190  | 2.348817 | -1.348595 | 2.639107  | 22                    | 23 | 24 |
| 9 H   | 4.698167  | -4.818972 | 2.873664  | 2.486163 | -2.550090 | 1.520677  | 25                    | 26 | 27 |
| 10 Cl | 0.864121  | 0.944378  | 6.058510  | 0.457273 | 0.499743  | 3.206025  | 28                    | 29 | 30 |
| 11 H  | 6.780021  | 0.193823  | 2.761527  | 3.587833 | 0.102567  | 1.461337  | 31                    | 32 | 33 |
| 12 C  | 2.164610  | -3.512194 | -4.026520 | 1.145462 | -1.858573 | -2.130743 | 34                    | 35 | 36 |
| 13 C  | 3.850751  | -5.173353 | -2.827016 | 2.037730 | -2.737620 | -1.495993 | 37                    | 38 | 39 |
| 14 C  | 6.402982  | -5.070059 | -3.338428 | 3.388312 | -2.682960 | -1.766620 | 40                    | 41 | 42 |
| 15 C  | 7.354659  | -3.160887 | -4.917154 | 3.891918 | -1.672669 | -2.602046 | 43                    | 44 | 45 |
| 16 C  | 5.671430  | -1.655797 | -6.298767 | 3.001192 | -0.876210 | -3.333164 | 46                    | 47 | 48 |
| 17 C  | 3.093410  | -1.854390 | -5.879666 | 1.636962 | -0.981301 | -3.111385 | 49                    | 50 | 51 |
| 18 H  | 3.117253  | -6.529682 | -1.481334 | 1.649579 | -3.455359 | -0.783888 | 52                    | 53 | 54 |
| 19 H  | 7.704807  | -6.347880 | -2.414238 | 4.077208 | -3.359153 | -1.277560 | 55                    | 56 | 57 |
| 20 O  | 9.880457  | -2.659397 | -4.983876 | 5.228513 | -1.407292 | -2.637354 | 58                    | 59 | 60 |
| 21 H  | 6.446363  | -0.251248 | -7.565539 | 3.411269 | -0.132954 | -4.003511 | 61                    | 62 | 63 |
| 22 H  | 1.823184  | -0.587770 | -6.864355 | 0.964787 | -0.311035 | -3.632460 | 64                    | 65 | 66 |

|      |           |           |           |           |           |           |     |     |     |
|------|-----------|-----------|-----------|-----------|-----------|-----------|-----|-----|-----|
| 23 H | 10.508669 | -2.523454 | -3.080232 | 5.560948  | -1.335355 | -1.629989 | 67  | 68  | 69  |
| 24 H | -7.376921 | -4.286970 | -6.764635 | -3.903699 | -2.268567 | -3.579691 | 70  | 71  | 72  |
| 25 O | -6.606782 | -0.417222 | -7.315126 | -3.496158 | -0.220784 | -3.870998 | 73  | 74  | 75  |
| 26 C | -0.446574 | -3.476543 | -3.158538 | -0.236317 | -1.839707 | -1.671427 | 76  | 77  | 78  |
| 27 C | -2.566249 | -3.125957 | -5.012833 | -1.358001 | -1.654185 | -2.652677 | 79  | 80  | 81  |
| 28 C | -5.116446 | -2.756867 | -3.733963 | -2.707507 | -1.458871 | -1.975928 | 82  | 83  | 84  |
| 29 C | -7.230208 | -2.550456 | -5.645519 | -3.826061 | -1.349643 | -2.987480 | 85  | 86  | 87  |
| 30 H | -5.488513 | -4.321646 | -2.439301 | -2.904396 | -2.286917 | -1.290822 | 88  | 89  | 90  |
| 31 H | -2.317914 | -0.622440 | 2.310129  | -1.226588 | -0.329381 | 1.222467  | 91  | 92  | 93  |
| 32 H | -9.029076 | -2.198355 | -4.688566 | -4.777981 | -1.163319 | -2.481082 | 94  | 95  | 96  |
| 33 H | -2.178889 | -1.508927 | -6.238152 | -1.153018 | -0.798490 | -3.301088 | 97  | 98  | 99  |
| 34 H | -5.057090 | -1.034306 | -2.596603 | -2.676097 | -0.547331 | -1.374063 | 100 | 101 | 102 |
| 35 H | -7.974308 | -0.099943 | -8.525690 | -4.219822 | -0.052887 | -4.511601 | 103 | 104 | 105 |
| 36 H | -2.585897 | -4.789618 | -6.255676 | -1.368398 | -2.534557 | -3.310361 | 106 | 107 | 108 |
| 37 O | -0.955248 | -3.821503 | -0.856218 | -0.505495 | -2.022252 | -0.453091 | 109 | 110 | 111 |

---

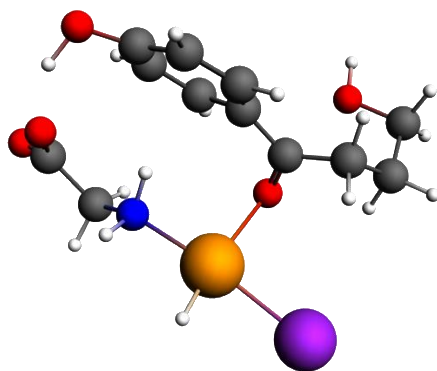

Structure **M** (X=I) Coordinates (Cartesian)

=====

| Atom | bohr      |           |           | angstrom  |           |           | Geometric Variables   |    |    |
|------|-----------|-----------|-----------|-----------|-----------|-----------|-----------------------|----|----|
|      | X         | Y         | Z         | X         | Y         | Z         | (0:frozen, *:LT par.) |    |    |
| 1 Pd | -0.099259 | -2.622389 | 2.761081  | -0.052525 | -1.387709 | 1.461101  | 1                     | 2  | 3  |
| 2 C  | 5.605784  | -2.049120 | 1.527827  | 2.966453  | -1.084347 | 0.808491  | 4                     | 5  | 6  |
| 3 C  | 7.943000  | -2.978591 | 0.033758  | 4.203255  | -1.576203 | 0.017864  | 7                     | 8  | 9  |
| 4 N  | 3.491800  | -3.893222 | 1.525438  | 1.847781  | -2.060204 | 0.807227  | 10                    | 11 | 12 |
| 5 O  | 7.817638  | -5.281245 | -0.801834 | 4.136916  | -2.794714 | -0.424312 | 13                    | 14 | 15 |
| 6 O  | 9.703483  | -1.410744 | -0.281039 | 5.134862  | -0.746534 | -0.148719 | 16                    | 17 | 18 |
| 7 H  | 4.958513  | -0.282509 | 0.693282  | 2.623932  | -0.149497 | 0.366869  | 19                    | 20 | 21 |
| 8 H  | 4.002666  | -5.420377 | 2.581823  | 2.118120  | -2.868340 | 1.366242  | 22                    | 23 | 24 |
| 9 H  | 3.267452  | -4.563085 | -0.269615 | 1.729061  | -2.414681 | -0.142674 | 25                    | 26 | 27 |
| 10 H | -3.212440 | 2.127268  | -7.635010 | -1.699950 | 1.125702  | -4.040273 | 28                    | 29 | 30 |
| 11 H | 6.147575  | -1.662119 | 3.478715  | 3.253156  | -0.879555 | 1.840857  | 31                    | 32 | 33 |
| 12 C | 0.255368  | -2.991228 | -3.928185 | 0.135135  | -1.582890 | -2.078706 | 34                    | 35 | 36 |
| 13 C | 2.502965  | -1.607166 | -4.190522 | 1.324512  | -0.850476 | -2.217529 | 37                    | 38 | 39 |
| 14 C | 4.722539  | -2.802667 | -4.866401 | 2.499060  | -1.483107 | -2.575189 | 40                    | 41 | 42 |
| 15 C | 4.755716  | -5.436206 | -5.180302 | 2.516617  | -2.876716 | -2.741298 | 43                    | 44 | 45 |
| 16 C | 2.478102  | -6.774219 | -5.215827 | 1.311355  | -3.584762 | -2.760097 | 46                    | 47 | 48 |
| 17 C | 0.232858  | -5.550495 | -4.606640 | 0.123223  | -2.937195 | -2.437729 | 49                    | 50 | 51 |
| 18 H | 2.463782  | 0.393184  | -3.764079 | 1.303777  | 0.208064  | -1.991865 | 52                    | 53 | 54 |
| 19 H | 6.482072  | -1.769412 | -5.017371 | 3.430165  | -0.936333 | -2.655078 | 55                    | 56 | 57 |
| 20 O | 7.012962  | -6.710765 | -5.227242 | 3.711100  | -3.551184 | -2.766138 | 58                    | 59 | 60 |
| 21 H | 2.544461  | -8.789746 | -5.550372 | 1.346471  | -4.651333 | -2.937130 | 61                    | 62 | 63 |
| 22 H | -1.495312 | -6.638897 | -4.465576 | -0.791285 | -3.513153 | -2.363081 | 64                    | 65 | 66 |
| 23 H | 7.922263  | -6.250613 | -3.518066 | 4.192281  | -3.307682 | -1.861681 | 67                    | 68 | 69 |

|      |           |           |           |           |           |           |     |     |     |
|------|-----------|-----------|-----------|-----------|-----------|-----------|-----|-----|-----|
| 24 H | -6.998162 | -0.059634 | -6.885191 | -3.703268 | -0.031557 | -3.643486 | 70  | 71  | 72  |
| 25 O | -3.498404 | 1.558517  | -5.896366 | -1.851276 | 0.824732  | -3.120223 | 73  | 74  | 75  |
| 26 C | -1.825219 | -1.803122 | -2.544726 | -0.965864 | -0.954171 | -1.346611 | 76  | 77  | 78  |
| 27 C | -4.530748 | -2.592037 | -2.924608 | -2.397569 | -1.371647 | -1.547636 | 79  | 80  | 81  |
| 28 C | -6.283441 | -0.291354 | -2.878751 | -3.325054 | -0.154178 | -1.523369 | 82  | 83  | 84  |
| 29 C | -6.179192 | 1.103034  | -5.378422 | -3.269888 | 0.583700  | -2.846138 | 85  | 86  | 87  |
| 30 H | -8.226531 | -0.876239 | -2.489878 | -4.353293 | -0.463686 | -1.317587 | 88  | 89  | 90  |
| 31 H | 0.294731  | -4.203845 | 5.128829  | 0.155965  | -2.224579 | 2.714060  | 91  | 92  | 93  |
| 32 H | -7.199090 | 2.898209  | -5.262204 | -3.809594 | 1.533666  | -2.784638 | 94  | 95  | 96  |
| 33 H | -4.745487 | -3.646985 | -4.686400 | -2.511204 | -1.929901 | -2.479936 | 97  | 98  | 99  |
| 34 H | -5.664233 | 0.946289  | -1.346560 | -2.997383 | 0.500755  | -0.712569 | 100 | 101 | 102 |
| 35 I | -4.598248 | -1.860593 | 4.806432  | -2.433288 | -0.984584 | 2.543454  | 103 | 104 | 105 |
| 36 H | -5.015966 | -3.824654 | -1.327757 | -2.654335 | -2.023920 | -0.702619 | 106 | 107 | 108 |
| 37 O | -1.294789 | -0.224201 | -0.846656 | -0.685173 | -0.118642 | -0.448031 | 109 | 110 | 111 |

---

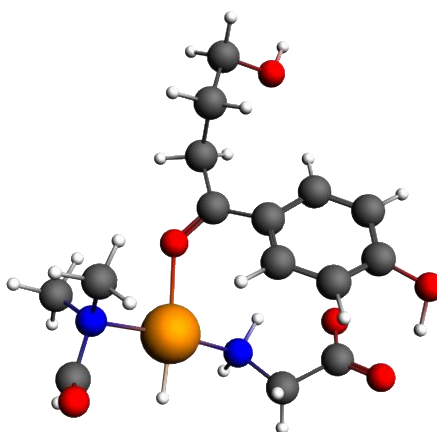

Structure **M** (X=DMF) Coordinates (Cartesian)

=====

| Atom | bohr      |           |           | angstrom  |           |           | Geometric Variables   |    |    |
|------|-----------|-----------|-----------|-----------|-----------|-----------|-----------------------|----|----|
|      | X         | Y         | Z         | X         | Y         | Z         | (0:frozen, *:LT par.) |    |    |
| 1 Pd | 1.812887  | 0.859103  | 2.189987  | 0.959339  | 0.454618  | 1.158891  | 1                     | 2  | 3  |
| 2 C  | 5.416375  | -3.629690 | 2.282568  | 2.866222  | -1.920749 | 1.207883  | 4                     | 5  | 6  |
| 3 C  | 5.327977  | -6.051803 | 0.674097  | 2.819444  | -3.202476 | 0.356717  | 7                     | 8  | 9  |
| 4 N  | 2.751724  | -2.859301 | 2.887312  | 1.456150  | -1.513077 | 1.527900  | 10                    | 11 | 12 |
| 5 O  | 7.390780  | -6.625197 | -0.484605 | 3.911032  | -3.505903 | -0.256442 | 13                    | 14 | 15 |
| 6 O  | 3.212544  | -7.162494 | 0.530733  | 1.700005  | -3.790229 | 0.280852  | 16                    | 17 | 18 |
| 7 H  | 6.378183  | -2.152394 | 1.233194  | 3.375189  | -1.138998 | 0.652578  | 19                    | 20 | 21 |
| 8 H  | 2.376991  | -3.183813 | 4.748945  | 1.257849  | -1.684801 | 2.513034  | 22                    | 23 | 24 |
| 9 H  | 1.637693  | -4.100812 | 1.857870  | 0.866630  | -2.170056 | 0.983142  | 25                    | 26 | 27 |
| 10 H | -8.060474 | -6.316873 | -6.946527 | -4.265419 | -3.342745 | -3.675944 | 28                    | 29 | 30 |
| 11 H | 6.466439  | -3.990574 | 4.021027  | 3.421892  | -2.111721 | 2.127836  | 31                    | 32 | 33 |
| 12 C | 0.089963  | -2.675443 | -3.411057 | 0.047606  | -1.415783 | -1.805053 | 34                    | 35 | 36 |
| 13 C | 2.614934  | -1.822170 | -3.290771 | 1.383763  | -0.964251 | -1.741401 | 37                    | 38 | 39 |
| 14 C | 4.565342  | -3.357760 | -4.047769 | 2.415875  | -1.776850 | -2.141987 | 40                    | 41 | 42 |
| 15 C | 4.048289  | -5.859640 | -4.810851 | 2.142262  | -3.100788 | -2.545793 | 43                    | 44 | 45 |
| 16 C | 1.548906  | -6.582206 | -5.305434 | 0.819646  | -3.483153 | -2.807515 | 46                    | 47 | 48 |
| 17 C | -0.409798 | -5.012052 | -4.613210 | -0.216856 | -2.652264 | -2.441206 | 49                    | 50 | 51 |
| 18 H | 3.012792  | 0.069628  | -2.609516 | 1.594301  | 0.036846  | -1.380896 | 52                    | 53 | 54 |
| 19 H | 6.510822  | -2.737031 | -3.971733 | 3.445379  | -1.448374 | -2.101750 | 55                    | 56 | 57 |
| 20 O | 5.921425  | -7.594400 | -4.911942 | 3.133483  | -4.018783 | -2.599288 | 58                    | 59 | 60 |
| 21 H | 1.212652  | -8.465527 | -6.020748 | 0.641708  | -4.479764 | -3.186043 | 61                    | 62 | 63 |
| 22 H | -2.336811 | -5.656793 | -4.873609 | -1.236587 | -2.993446 | -2.579003 | 64                    | 65 | 66 |



|      |           |           |           |           |           |           |     |     |     |
|------|-----------|-----------|-----------|-----------|-----------|-----------|-----|-----|-----|
| 23 H | 6.941067  | -7.525430 | -3.184494 | 3.673055  | -3.982286 | -1.685162 | 67  | 68  | 69  |
| 24 H | -9.097311 | -2.088356 | -5.511646 | -4.814090 | -1.105111 | -2.916638 | 70  | 71  | 72  |
| 25 O | -6.730399 | -5.191328 | -6.318161 | -3.561574 | -2.747133 | -3.343427 | 73  | 74  | 75  |
| 26 C | -1.876302 | -1.273289 | -2.170102 | -0.992896 | -0.673796 | -1.148368 | 76  | 77  | 78  |
| 27 C | -4.592685 | -1.655735 | -2.886727 | -2.430344 | -0.876177 | -1.527590 | 79  | 80  | 81  |
| 28 C | -5.142912 | -1.047555 | -5.678435 | -2.721512 | -0.554342 | -3.004898 | 82  | 83  | 84  |
| 29 C | -7.407758 | -2.522095 | -6.623515 | -3.920017 | -1.334635 | -3.505013 | 85  | 86  | 87  |
| 30 H | -5.477176 | 0.979095  | -5.912816 | -2.898396 | 0.518115  | -3.128928 | 88  | 89  | 90  |
| 31 H | -5.739799 | -0.486915 | -1.632627 | -3.037371 | -0.257664 | -0.863949 | 91  | 92  | 93  |
| 32 H | -7.759435 | -2.095375 | -8.613516 | -4.106116 | -1.108825 | -4.558076 | 94  | 95  | 96  |
| 33 H | -5.092416 | -3.635211 | -2.546078 | -2.694791 | -1.923671 | -1.347326 | 97  | 98  | 99  |
| 34 H | -3.519157 | -1.553941 | -6.849718 | -1.862258 | -0.822310 | -3.624715 | 100 | 101 | 102 |
| 35 H | 3.872650  | 1.361523  | 4.183234  | 2.049318  | 0.720487  | 2.213672  | 103 | 104 | 105 |
| 36 H | -0.336689 | 4.409671  | -1.854248 | -0.178168 | 2.333497  | -0.981226 | 106 | 107 | 108 |
| 37 O | -1.391585 | 0.294409  | -0.393641 | -0.736395 | 0.155794  | -0.208306 | 109 | 110 | 111 |
| 38 C | 2.938522  | 5.959608  | 3.320136  | 1.554999  | 3.153689  | 1.756940  | 112 | 113 | 114 |
| 39 O | 4.739460  | 7.062289  | 2.371251  | 2.508014  | 3.737203  | 1.254812  | 115 | 116 | 117 |
| 40 H | 2.654926  | 5.790690  | 5.356581  | 1.404926  | 3.064301  | 2.834581  | 118 | 119 | 120 |
| 41 N | 0.977385  | 4.810342  | 1.857798  | 0.517210  | 2.545523  | 0.983105  | 121 | 122 | 123 |
| 42 C | -1.581914 | 5.075057  | 3.004646  | -0.837113 | 2.685605  | 1.589990  | 124 | 125 | 126 |
| 43 H | 2.924616  | 5.254474  | -1.593199 | 1.547640  | 2.780548  | -0.843084 | 127 | 128 | 129 |
| 44 H | -2.235152 | 7.030360  | 2.835834  | -1.182791 | 3.720306  | 1.500659  | 130 | 131 | 132 |
| 45 H | -1.510682 | 4.533909  | 4.990286  | -0.799419 | 2.399241  | 2.640745  | 133 | 134 | 135 |
| 46 H | -2.862085 | 3.810707  | 2.012844  | -1.514550 | 2.016539  | 1.065151  | 136 | 137 | 138 |
| 47 C | 1.034839  | 5.554778  | -0.846012 | 0.547613  | 2.939462  | -0.447690 | 139 | 140 | 141 |
| 48 H | 0.574725  | 7.563069  | -1.030856 | 0.304132  | 4.002204  | -0.545505 | 142 | 143 | 144 |

---

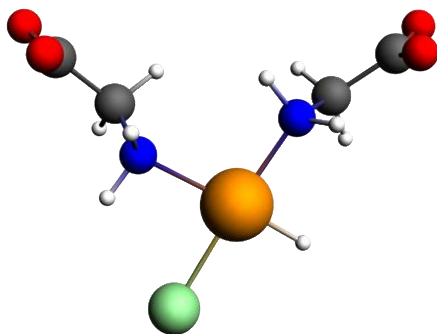

Structure N (X=Cl) Coordinates (Cartesian)

=====

| Atom  | bohr      |           |           | angstrom  |           |           | Geometric Variables   |    |    |  |  |  |  |  |  |
|-------|-----------|-----------|-----------|-----------|-----------|-----------|-----------------------|----|----|--|--|--|--|--|--|
|       | X         | Y         | Z         | X         | Y         | Z         | (0:frozen, *:LT par.) |    |    |  |  |  |  |  |  |
| 1 Pd  | 1.424429  | 0.726572  | 4.803920  | 0.753775  | 0.384485  | 2.542125  | 1                     | 2  | 3  |  |  |  |  |  |  |
| 2 C   | 6.154400  | -3.012809 | 4.569169  | 3.256768  | -1.594310 | 2.417900  | 4                     | 5  | 6  |  |  |  |  |  |  |
| 3 C   | 7.051196  | -5.815046 | 4.626425  | 3.731332  | -3.077190 | 2.448199  | 7                     | 8  | 9  |  |  |  |  |  |  |
| 4 N   | 3.569538  | -2.714139 | 5.612428  | 1.888918  | -1.436260 | 2.969969  | 10                    | 11 | 12 |  |  |  |  |  |  |
| 5 O   | 9.418120  | -6.169048 | 4.344495  | 4.983854  | -3.264519 | 2.299008  | 13                    | 14 | 15 |  |  |  |  |  |  |
| 6 O   | 5.290333  | -7.464109 | 4.889930  | 2.799523  | -3.949837 | 2.587639  | 16                    | 17 | 18 |  |  |  |  |  |  |
| 7 H   | 6.179675  | -2.377610 | 2.602536  | 3.270143  | -1.258177 | 1.377203  | 19                    | 20 | 21 |  |  |  |  |  |  |
| 8 H   | 3.653698  | -2.554556 | 7.536287  | 1.933454  | -1.351813 | 3.988031  | 22                    | 23 | 24 |  |  |  |  |  |  |
| 9 H   | 2.646377  | -4.376000 | 5.217391  | 1.400402  | -2.315680 | 2.760924  | 25                    | 26 | 27 |  |  |  |  |  |  |
| 10 Cl | 1.607753  | 1.658004  | 9.296929  | 0.850786  | 0.877378  | 4.919723  | 28                    | 29 | 30 |  |  |  |  |  |  |
| 11 H  | 7.470259  | -1.835069 | 5.627535  | 3.953091  | -0.971077 | 2.977963  | 31                    | 32 | 33 |  |  |  |  |  |  |
| 12 H  | -0.136123 | 3.188230  | 4.371213  | -0.072033 | 1.687139  | 2.313146  | 34                    | 35 | 36 |  |  |  |  |  |  |
| 13 C  | 2.238863  | 1.972315  | -0.810835 | 1.184755  | 1.043704  | -0.429076 | 37                    | 38 | 39 |  |  |  |  |  |  |
| 14 C  | 0.893253  | 1.944072  | -3.426199 | 0.472689  | 1.028758  | -1.813066 | 40                    | 41 | 42 |  |  |  |  |  |  |
| 15 N  | 1.086756  | 0.092715  | 0.946338  | 0.575087  | 0.049063  | 0.500780  | 43                    | 44 | 45 |  |  |  |  |  |  |
| 16 O  | -1.211436 | 0.738338  | -3.500126 | -0.641064 | 0.390712  | -1.852187 | 46                    | 47 | 48 |  |  |  |  |  |  |
| 17 O  | 1.991050  | 3.178320  | -5.177460 | 1.053618  | 1.681894  | -2.739794 | 49                    | 50 | 51 |  |  |  |  |  |  |
| 18 H  | 4.245553  | 1.577477  | -1.040481 | 2.246650  | 0.834765  | -0.550599 | 52                    | 53 | 54 |  |  |  |  |  |  |
| 19 H  | 1.811813  | -1.653077 | 0.562967  | 0.958770  | -0.874770 | 0.297909  | 55                    | 56 | 57 |  |  |  |  |  |  |
| 20 H  | 2.027942  | 3.846336  | 0.013209  | 1.073141  | 2.035393  | 0.006990  | 58                    | 59 | 60 |  |  |  |  |  |  |
| 21 H  | -0.786535 | 0.024437  | 0.431796  | -0.416217 | 0.012931  | 0.228497  | 61                    | 62 | 63 |  |  |  |  |  |  |

-----

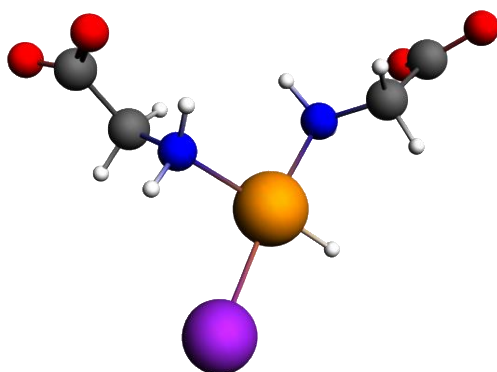

Structure **N** (X=I) Coordinates (Cartesian)

=====

| Atom | bohr      |           |           | angstrom  |           |           | Geometric Variables   |    |    |
|------|-----------|-----------|-----------|-----------|-----------|-----------|-----------------------|----|----|
|      | X         | Y         | Z         | X         | Y         | Z         | (0:frozen, *:LT par.) |    |    |
| 1 Pd | 0.381428  | -1.024569 | 3.734204  | 0.201843  | -0.542178 | 1.976056  | 1                     | 2  | 3  |
| 2 C  | 5.957435  | -1.952268 | 2.427965  | 3.152539  | -1.033096 | 1.284824  | 4                     | 5  | 6  |
| 3 C  | 7.878277  | -3.985393 | 1.520603  | 4.169005  | -2.108979 | 0.804668  | 7                     | 8  | 9  |
| 4 N  | 3.335318  | -2.576545 | 1.603001  | 1.764974  | -1.363449 | 0.848271  | 10                    | 11 | 12 |
| 5 O  | 6.899277  | -6.051734 | 0.710085  | 3.650940  | -3.202440 | 0.375761  | 13                    | 14 | 15 |
| 6 O  | 10.201892 | -3.398371 | 1.752515  | 5.398609  | -1.798340 | 0.927391  | 16                    | 17 | 18 |
| 7 H  | 6.492436  | -0.099994 | 1.708393  | 3.435649  | -0.052915 | 0.904043  | 19                    | 20 | 21 |
| 8 H  | 3.255452  | -4.517035 | 1.616539  | 1.722711  | -2.390312 | 0.855436  | 22                    | 23 | 24 |
| 9 H  | 3.111253  | -2.041543 | -0.236244 | 1.646404  | -1.080338 | -0.125015 | 25                    | 26 | 27 |
| 10 I | -3.156333 | 0.677196  | 6.951305  | -1.670259 | 0.358357  | 3.678472  | 28                    | 29 | 30 |
| 11 H | 5.995015  | -1.892614 | 4.485603  | 3.172425  | -1.001528 | 2.373679  | 31                    | 32 | 33 |
| 12 H | 1.258915  | -2.785154 | 5.921379  | 0.666189  | -1.473840 | 3.133459  | 34                    | 35 | 36 |
| 13 C | -2.456740 | 0.145770  | -1.339360 | -1.300051 | 0.077138  | -0.708759 | 37                    | 38 | 39 |
| 14 C | -2.650956 | 1.805552  | -3.759610 | -1.402825 | 0.955457  | -1.989500 | 40                    | 41 | 42 |
| 15 N | -1.001522 | 1.416294  | 0.698751  | -0.529982 | 0.749471  | 0.369763  | 43                    | 44 | 45 |
| 16 O | -1.077246 | 3.648896  | -3.884791 | -0.570054 | 1.930912  | -2.055743 | 46                    | 47 | 48 |
| 17 O | -4.302356 | 1.118544  | -5.374090 | -2.276709 | 0.591908  | -2.843846 | 49                    | 50 | 51 |
| 18 H | -1.512976 | -1.620702 | -1.848154 | -0.800633 | -0.857639 | -0.978001 | 52                    | 53 | 54 |
| 19 H | -2.163502 | 2.640478  | 1.635755  | -1.144876 | 1.397281  | 0.865604  | 55                    | 56 | 57 |
| 20 H | 0.332952  | 2.500058  | -0.203963 | 0.176191  | 1.322974  | -0.107933 | 58                    | 59 | 60 |
| 21 H | -4.339400 | -0.322386 | -0.650903 | -2.296312 | -0.170599 | -0.344443 | 61                    | 62 | 63 |

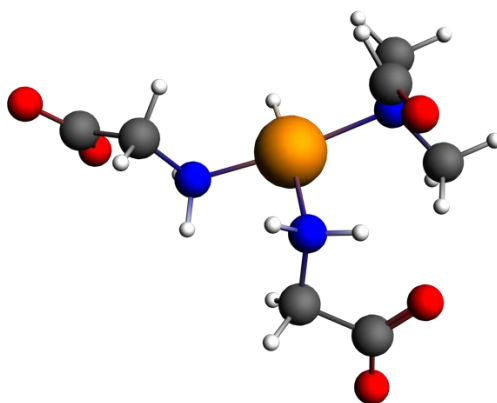

Structure **N** (X=DMF) Coordinates (Cartesian)

=====

| Atom | bohr      |            |           | angstrom  |           |           | Geometric Variables   |    |    |
|------|-----------|------------|-----------|-----------|-----------|-----------|-----------------------|----|----|
|      | X         | Y          | Z         | X         | Y         | Z         | (0:frozen, *:LT par.) |    |    |
| 1 Pd | -1.050612 | -2.541164  | 1.804521  | -0.555960 | -1.344726 | 0.954911  | 1                     | 2  | 3  |
| 2 C  | -0.214582 | -8.312582  | 1.398584  | -0.113552 | -4.398829 | 0.740099  | 4                     | 5  | 6  |
| 3 C  | 2.268280  | -9.185872  | 2.731884  | 1.200322  | -4.860954 | 1.445651  | 7                     | 8  | 9  |
| 4 N  | -1.546170 | -6.448593  | 3.036310  | -0.818198 | -3.412448 | 1.606746  | 10                    | 11 | 12 |
| 5 O  | 2.479801  | -8.467501  | 5.042321  | 1.312254  | -4.480809 | 2.668282  | 13                    | 14 | 15 |
| 6 O  | 3.754949  | -10.494066 | 1.399885  | 1.987034  | -5.553220 | 0.740787  | 16                    | 17 | 18 |
| 7 H  | -1.370562 | -9.994795  | 1.072768  | -0.725270 | -5.289018 | 0.567684  | 19                    | 20 | 21 |
| 8 H  | -0.768231 | -6.712878  | 4.813947  | -0.406531 | -3.552302 | 2.547431  | 22                    | 23 | 24 |
| 9 H  | -3.444284 | -6.764727  | 3.123837  | -1.822636 | -3.579739 | 1.653063  | 25                    | 26 | 27 |
| 10 H | 4.531768  | -2.500979  | 4.160506  | 2.398108  | -1.323461 | 2.201645  | 28                    | 29 | 30 |
| 11 H | 0.304554  | -7.493973  | -0.418613 | 0.161163  | -3.965640 | -0.221521 | 31                    | 32 | 33 |
| 12 C | -1.182144 | -1.660215  | 6.772217  | -0.625563 | -0.878548 | 3.583703  | 34                    | 35 | 36 |
| 13 O | -1.417724 | -3.520382  | 8.150826  | -0.750227 | -1.862906 | 4.313231  | 37                    | 38 | 39 |
| 14 H | -2.593814 | -0.151960  | 6.678593  | -1.372587 | -0.080414 | 3.534159  | 40                    | 41 | 42 |
| 15 N | 0.925045  | -1.230706  | 5.178881  | 0.489513  | -0.651261 | 2.740546  | 43                    | 44 | 45 |
| 16 C | 1.573788  | 1.487873   | 4.883542  | 0.832813  | 0.787349  | 2.584259  | 46                    | 47 | 48 |
| 17 H | 4.047847  | -2.186275  | 7.486207  | 2.142029  | -1.156927 | 3.961530  | 49                    | 50 | 51 |
| 18 H | 2.830711  | 1.693490   | 3.274779  | 1.497948  | 0.896156  | 1.732938  | 52                    | 53 | 54 |
| 19 H | 2.517876  | 2.161734   | 6.599274  | 1.332403  | 1.143940  | 3.492185  | 55                    | 56 | 57 |
| 20 H | -0.125128 | 2.589855   | 4.525895  | -0.066215 | 1.370492  | 2.395000  | 58                    | 59 | 60 |
| 21 C | 3.198823  | -2.793847  | 5.698151  | 1.692744  | -1.478440 | 3.015332  | 61                    | 62 | 63 |
| 22 H | -0.832027 | 0.184436   | 0.707385  | -0.440290 | 0.097600  | 0.374332  | 64                    | 65 | 66 |
| 23 H | 2.756109  | -4.807821  | 5.809547  | 1.458470  | -2.544189 | 3.074280  | 67                    | 68 | 69 |

|      |           |           |           |           |           |           |    |    |    |
|------|-----------|-----------|-----------|-----------|-----------|-----------|----|----|----|
| 24 C | -5.700669 | -2.542393 | -1.494246 | -3.016664 | -1.345376 | -0.790721 | 70 | 71 | 72 |
| 25 C | -6.386054 | -1.488287 | -4.170172 | -3.379354 | -0.787567 | -2.206760 | 73 | 74 | 75 |
| 26 N | -2.965276 | -3.263801 | -1.476467 | -1.569157 | -1.727129 | -0.781313 | 76 | 77 | 78 |
| 27 O | -4.459800 | -1.077025 | -5.589307 | -2.360024 | -0.569937 | -2.957734 | 79 | 80 | 81 |
| 28 O | -8.712337 | -1.124225 | -4.573168 | -4.610370 | -0.594914 | -2.420016 | 82 | 83 | 84 |
| 29 H | -6.890942 | -4.160605 | -1.047943 | -3.646530 | -2.201697 | -0.554547 | 85 | 86 | 87 |
| 30 H | -2.258019 | -2.247378 | -3.007329 | -1.194892 | -1.189261 | -1.591410 | 88 | 89 | 90 |
| 31 H | -2.777762 | -5.131169 | -1.922010 | -1.469928 | -2.715297 | -1.017084 | 91 | 92 | 93 |
| 32 H | -6.029715 | -1.048953 | -0.118864 | -3.190788 | -0.555082 | -0.062900 | 94 | 95 | 96 |

---

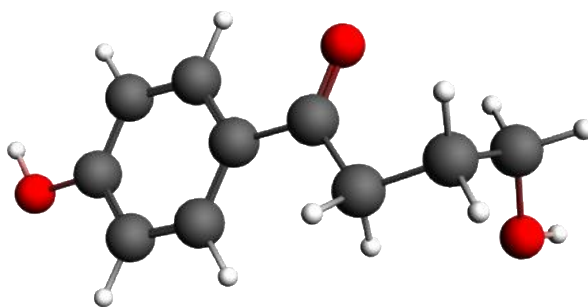

### Structure P2 Coordinates (Cartesian)

=====

| Atom | bohr      |           |           | angstrom  |           |           | Geometric Variables   |    |    |
|------|-----------|-----------|-----------|-----------|-----------|-----------|-----------------------|----|----|
|      | X         | Y         | Z         | X         | Y         | Z         | (0:frozen, *:LT par.) |    |    |
| 1 C  | -4.841558 | 0.603371  | -1.233680 | -2.562042 | 0.319290  | -0.652836 | 1                     | 2  | 3  |
| 2 H  | -4.501240 | 2.605951  | -4.732477 | -2.381954 | 1.379010  | -2.504319 | 4                     | 5  | 6  |
| 3 C  | -0.919666 | -0.958956 | -5.423064 | -0.486666 | -0.507458 | -2.869762 | 7                     | 8  | 9  |
| 4 H  | -5.908969 | 2.111059  | -0.307344 | -3.126891 | 1.117124  | -0.162640 | 10                    | 11 | 12 |
| 5 C  | -5.164237 | 0.764058  | -4.075290 | -2.732796 | 0.404322  | -2.156550 | 13                    | 14 | 15 |
| 6 H  | -4.214892 | -3.136902 | -4.517368 | -2.230425 | -1.659977 | -2.390488 | 16                    | 17 | 18 |
| 7 H  | -7.179637 | 0.587671  | -4.496850 | -3.799300 | 0.310982  | -2.379630 | 19                    | 20 | 21 |
| 8 H  | -5.638699 | -2.162239 | 1.333250  | -2.983871 | -1.144207 | 0.705526  | 22                    | 23 | 24 |
| 9 C  | -3.744607 | -1.342605 | -5.433223 | -1.981561 | -0.710476 | -2.875138 | 25                    | 26 | 27 |
| 10 H | -4.367911 | -1.462570 | -7.406106 | -2.311399 | -0.773959 | -3.919142 | 28                    | 29 | 30 |
| 11 O | 0.034542  | 0.995300  | -4.519833 | 0.018279  | 0.526690  | -2.391793 | 31                    | 32 | 33 |
| 12 C | 0.717659  | -2.937715 | -6.542449 | 0.379769  | -1.554572 | -3.462115 | 34                    | 35 | 36 |
| 13 C | 3.326357  | -2.513103 | -6.616080 | 1.760232  | -1.329877 | -3.501079 | 37                    | 38 | 39 |
| 14 C | 4.949978  | -4.293120 | -7.648017 | 2.619416  | -2.271821 | -4.047157 | 40                    | 41 | 42 |
| 15 C | 3.957256  | -6.531708 | -8.618887 | 2.094090  | -3.456431 | -4.560919 | 43                    | 44 | 45 |
| 16 C | 1.368431  | -6.995472 | -8.562330 | 0.724142  | -3.701845 | -4.530990 | 46                    | 47 | 48 |
| 17 C | -0.237914 | -5.203149 | -7.527511 | -0.125899 | -2.753388 | -3.983387 | 49                    | 50 | 51 |
| 18 H | 4.043722  | -0.757079 | -5.847752 | 2.139846  | -0.400629 | -3.094497 | 52                    | 53 | 54 |
| 19 H | 6.966287  | -3.936950 | -7.693547 | 3.686400  | -2.083344 | -4.071250 | 55                    | 56 | 57 |
| 20 O | 5.443998  | -8.415355 | -9.686388 | 2.880840  | -4.453214 | -5.125816 | 58                    | 59 | 60 |
| 21 H | 0.675806  | -8.757661 | -9.331156 | 0.357621  | -4.634354 | -4.937835 | 61                    | 62 | 63 |
| 22 H | -2.244021 | -5.591687 | -7.488543 | -1.187485 | -2.958994 | -3.962766 | 64                    | 65 | 66 |
| 23 H | 7.256693  | -8.016739 | -9.687878 | 3.840077  | -4.242276 | -5.126604 | 67                    | 68 | 69 |
| 24 H | -2.848884 | 0.742810  | -0.719095 | -1.507564 | 0.393078  | -0.380529 | 70                    | 71 | 72 |
| 25 O | -5.860162 | -1.875485 | -0.484222 | -3.101064 | -0.992464 | -0.256239 | 73                    | 74 | 75 |

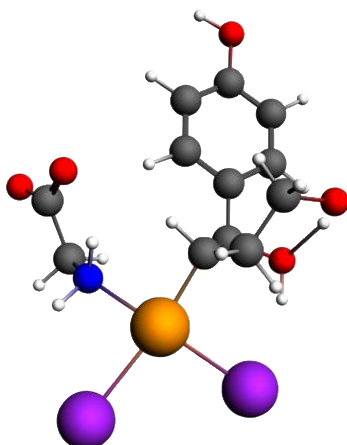

### Structure H: Coordinates (Cartesian)

=====

| Atom | bohr      |           |            | angstrom  |           |           | Geometric Variables   |    |    |
|------|-----------|-----------|------------|-----------|-----------|-----------|-----------------------|----|----|
|      | X         | Y         | Z          | X         | Y         | Z         | (0:frozen, *:LT par.) |    |    |
| 1 Pd | -0.154356 | 0.885734  | 0.236855   | -0.081682 | 0.468710  | 0.125338  | 1                     | 2  | 3  |
| 2 C  | 4.169946  | -2.862222 | 0.893391   | 2.206641  | -1.514623 | 0.472762  | 4                     | 5  | 6  |
| 3 C  | 4.805619  | -5.598362 | 0.047858   | 2.543024  | -2.962525 | 0.025325  | 7                     | 8  | 9  |
| 4 N  | 1.409771  | -2.574739 | 1.374974   | 0.746019  | -1.362493 | 0.727605  | 10                    | 11 | 12 |
| 5 O  | 2.920870  | -6.855952 | -0.848139  | 1.545658  | -3.628014 | -0.448816 | 13                    | 14 | 15 |
| 6 O  | 7.102501  | -6.274465 | 0.221644   | 3.758481  | -3.320304 | 0.117289  | 16                    | 17 | 18 |
| 7 H  | 4.749438  | -1.581714 | -0.617214  | 2.513294  | -0.837007 | -0.326615 | 19                    | 20 | 21 |
| 8 H  | 1.055772  | -2.606231 | 3.273140   | 0.558690  | -1.379158 | 1.732071  | 22                    | 23 | 24 |
| 9 H  | 0.576976  | -4.112659 | 0.522670   | 0.305322  | -2.176325 | 0.276585  | 25                    | 26 | 27 |
| 10 I | 0.367443  | 2.330852  | 5.386043   | 0.194443  | 1.233434  | 2.850171  | 28                    | 29 | 30 |
| 11 H | 5.229645  | -2.363376 | 2.585231   | 2.767409  | -1.250645 | 1.368045  | 31                    | 32 | 33 |
| 12 C | 2.135973  | -1.540578 | -7.248163  | 1.130308  | -0.815239 | -3.835562 | 34                    | 35 | 36 |
| 13 C | 2.976484  | -3.935672 | -6.511960  | 1.575087  | -2.082668 | -3.445981 | 37                    | 38 | 39 |
| 14 C | 3.929637  | -5.631474 | -8.286676  | 2.079474  | -2.980048 | -4.385120 | 40                    | 41 | 42 |
| 15 C | 4.042389  | -4.941233 | -10.813913 | 2.139140  | -2.614788 | -5.722476 | 43                    | 44 | 45 |
| 16 C | 3.224591  | -2.575122 | -11.589231 | 1.706380  | -1.362696 | -6.132757 | 46                    | 47 | 48 |
| 17 C | 2.289761  | -0.883416 | -9.803060  | 1.211689  | -0.467483 | -5.187556 | 49                    | 50 | 51 |
| 18 H | 2.903878  | -4.570736 | -4.564854  | 1.536666  | -2.418729 | -2.415617 | 52                    | 53 | 54 |
| 19 H | 4.576362  | -7.466997 | -7.643096  | 2.421706  | -3.951365 | -4.044552 | 55                    | 56 | 57 |
| 20 O | 4.987963  | -6.585404 | -12.703719 | 2.639516  | -3.484846 | -6.722519 | 58                    | 59 | 60 |
| 21 H | 3.326003  | -2.092340 | -13.574063 | 1.760045  | -1.107219 | -7.183085 | 61                    | 62 | 63 |
| 22 H | 1.661819  | 0.973446  | -10.375618 | 0.879397  | 0.515125  | -5.490541 | 64                    | 65 | 66 |

|      |           |           |            |           |           |           |     |     |     |
|------|-----------|-----------|------------|-----------|-----------|-----------|-----|-----|-----|
| 23 H | 5.554405  | -8.181663 | -11.949769 | 2.939265  | -4.329550 | -6.323545 | 67  | 68  | 69  |
| 24 H | -2.691596 | -3.514732 | -7.095636  | -1.424331 | -1.859916 | -3.754849 | 70  | 71  | 72  |
| 25 O | -3.991225 | -0.109525 | -8.694466  | -2.112065 | -0.057958 | -4.600913 | 73  | 74  | 75  |
| 26 C | 1.200555  | 0.354685  | -5.294867  | 0.635306  | 0.187691  | -2.801923 | 76  | 77  | 78  |
| 27 C | -0.610390 | -0.754949 | -3.311083  | -0.323004 | -0.399502 | -1.752150 | 79  | 80  | 81  |
| 28 C | -3.410926 | -0.816923 | -4.056350  | -1.804984 | -0.432297 | -2.146528 | 82  | 83  | 84  |
| 29 C | -4.012313 | -1.980253 | -6.654187  | -2.123224 | -1.047905 | -3.521244 | 85  | 86  | 87  |
| 30 H | -4.383022 | -1.914877 | -2.592423  | -2.319396 | -1.013309 | -1.371851 | 88  | 89  | 90  |
| 31 H | 2.872105  | 1.118232  | -4.336549  | 1.519852  | 0.591743  | -2.294803 | 91  | 92  | 93  |
| 32 H | -5.934366 | -2.733216 | -6.664616  | -3.140331 | -1.446356 | -3.526763 | 94  | 95  | 96  |
| 33 H | -0.021090 | -2.706500 | -2.983414  | -0.011160 | -1.432218 | -1.578755 | 97  | 98  | 99  |
| 34 H | -4.246223 | 1.073111  | -4.011886  | -2.247004 | 0.567866  | -2.122999 | 100 | 101 | 102 |
| 35 I | -1.761792 | 5.524916  | -1.282016  | -0.932300 | 2.923659  | -0.678414 | 103 | 104 | 105 |
| 36 H | -0.460851 | 3.773193  | -5.478919  | -0.243872 | 1.996688  | -2.899319 | 106 | 107 | 108 |
| 37 O | 0.036269  | 2.446852  | -6.714340  | 0.019193  | 1.294818  | -3.553076 | 109 | 110 | 111 |
| 38 H | -2.554254 | 1.064114  | -8.373071  | -1.351653 | 0.563105  | -4.430838 | 112 | 113 | 114 |

---



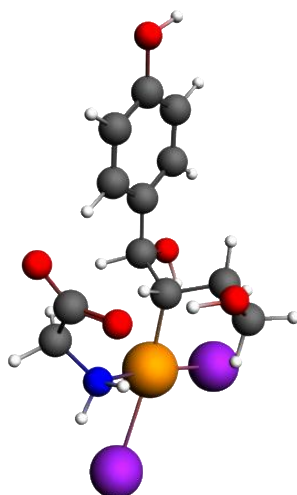

Structure J: Coordinates (Cartesian)

=====

| Atom | bohr      |           |            | angstrom  |           |           | Geometric Variables   |    |    |
|------|-----------|-----------|------------|-----------|-----------|-----------|-----------------------|----|----|
|      | X         | Y         | Z          | X         | Y         | Z         | (0:frozen, *:LT par.) |    |    |
| 1 Pd | 0.065190  | 0.964957  | 0.126352   | 0.034497  | 0.510633  | 0.066862  | 1                     | 2  | 3  |
| 2 C  | 3.151847  | -4.132963 | 0.675284   | 1.667885  | -2.187070 | 0.357345  | 4                     | 5  | 6  |
| 3 C  | 2.265372  | -6.371511 | -0.991979  | 1.198783  | -3.371658 | -0.524933 | 7                     | 8  | 9  |
| 4 N  | 0.960479  | -2.655454 | 1.586968   | 0.508263  | -1.405206 | 0.839787  | 10                    | 11 | 12 |
| 5 O  | -0.142822 | -6.662256 | -1.166397  | -0.075578 | -3.525514 | -0.617230 | 13                    | 14 | 15 |
| 6 O  | 4.000938  | -7.665659 | -2.022403  | 2.117205  | -4.056492 | -1.070209 | 16                    | 17 | 18 |
| 7 H  | 4.442485  | -2.949356 | -0.407084  | 2.350862  | -1.560732 | -0.215419 | 19                    | 20 | 21 |
| 8 H  | 1.081025  | -2.215805 | 3.463228   | 0.572054  | -1.172553 | 1.832661  | 22                    | 23 | 24 |
| 9 H  | -0.608303 | -3.750063 | 1.235419   | -0.321900 | -1.984448 | 0.653756  | 25                    | 26 | 27 |
| 10 I | -0.155463 | 2.339347  | 5.394850   | -0.082267 | 1.237929  | 2.854832  | 28                    | 29 | 30 |
| 11 H | 4.204388  | -4.923881 | 2.271388   | 2.224866  | -2.605606 | 1.201967  | 31                    | 32 | 33 |
| 12 C | 3.430924  | -1.092323 | -7.224256  | 1.815567  | -0.578032 | -3.822912 | 34                    | 35 | 36 |
| 13 C | 3.261202  | 0.024927  | -9.604181  | 1.725754  | 0.013191  | -5.082313 | 37                    | 38 | 39 |
| 14 C | 3.737608  | -1.370969 | -11.790488 | 1.977857  | -0.725486 | -6.239257 | 40                    | 41 | 42 |
| 15 C | 4.387657  | -3.904092 | -11.587225 | 2.321848  | -2.065957 | -6.131696 | 43                    | 44 | 45 |
| 16 C | 4.577572  | -5.052329 | -9.238252  | 2.422347  | -2.673577 | -4.888673 | 46                    | 47 | 48 |
| 17 C | 4.105862  | -3.645877 | -7.065404  | 2.172729  | -1.929315 | -3.738851 | 49                    | 50 | 51 |
| 18 H | 2.763505  | 2.004119  | -9.692511  | 1.462384  | 1.060534  | -5.129056 | 52                    | 53 | 54 |
| 19 H | 3.604640  | -0.468525 | -13.628886 | 1.907494  | -0.247933 | -7.212096 | 55                    | 56 | 57 |
| 20 O | 4.902890  | -5.422443 | -13.738683 | 2.594498  | -2.869433 | -7.270198 | 58                    | 59 | 60 |
| 21 H | 5.052184  | -7.036977 | -9.120671  | 2.673501  | -3.723808 | -4.826451 | 61                    | 62 | 63 |

|      |           |           |            |           |           |           |     |     |     |
|------|-----------|-----------|------------|-----------|-----------|-----------|-----|-----|-----|
| 22 H | 4.243124  | -4.615050 | -5.264519  | 2.245364  | -2.442180 | -2.785864 | 64  | 65  | 66  |
| 23 H | 4.411197  | -4.536724 | -15.290563 | 2.334305  | -2.400731 | -8.091418 | 67  | 68  | 69  |
| 24 H | -4.271468 | -1.437631 | -1.907036  | -2.260363 | -0.760762 | -1.009160 | 70  | 71  | 72  |
| 25 O | -3.877029 | -4.641526 | -4.273845  | -2.051635 | -2.456190 | -2.261622 | 73  | 74  | 75  |
| 26 C | 2.846283  | 0.441104  | -4.863144  | 1.506188  | 0.233422  | -2.573465 | 76  | 77  | 78  |
| 27 C | 0.475364  | -0.543771 | -3.508940  | 0.251552  | -0.287751 | -1.856851 | 79  | 80  | 81  |
| 28 C | -1.930125 | -0.412882 | -5.085478  | -1.021378 | -0.218488 | -2.691119 | 82  | 83  | 84  |
| 29 C | -4.099508 | -1.914587 | -3.918224  | -2.169366 | -1.013156 | -2.073435 | 85  | 86  | 87  |
| 30 H | -2.514221 | 1.552868  | -5.343476  | -1.330468 | 0.821742  | -2.827646 | 88  | 89  | 90  |
| 31 H | 4.465342  | 0.279680  | -3.575797  | 2.362957  | 0.148000  | -1.892230 | 91  | 92  | 93  |
| 32 H | -5.871495 | -1.427382 | -4.856958  | -3.107062 | -0.755338 | -2.570191 | 94  | 95  | 96  |
| 33 H | 0.836108  | -2.533578 | -3.098719  | 0.442449  | -1.340712 | -1.639772 | 97  | 98  | 99  |
| 34 H | -1.572115 | -1.229790 | -6.966565  | -0.831927 | -0.650777 | -3.686547 | 100 | 101 | 102 |
| 35 I | -1.527938 | 5.608732  | -1.351986  | -0.808550 | 2.968013  | -0.715440 | 103 | 104 | 105 |
| 36 H | 1.692758  | 4.041251  | -4.412500  | 0.895769  | 2.138538  | -2.334994 | 106 | 107 | 108 |
| 37 O | 2.638292  | 3.062133  | -5.694918  | 1.396124  | 1.620411  | -3.013621 | 109 | 110 | 111 |
| 38 H | -2.511455 | -5.410356 | -3.222222  | -1.329005 | -2.863037 | -1.705126 | 112 | 113 | 114 |

---

Elimination of the catalyzer from structure F

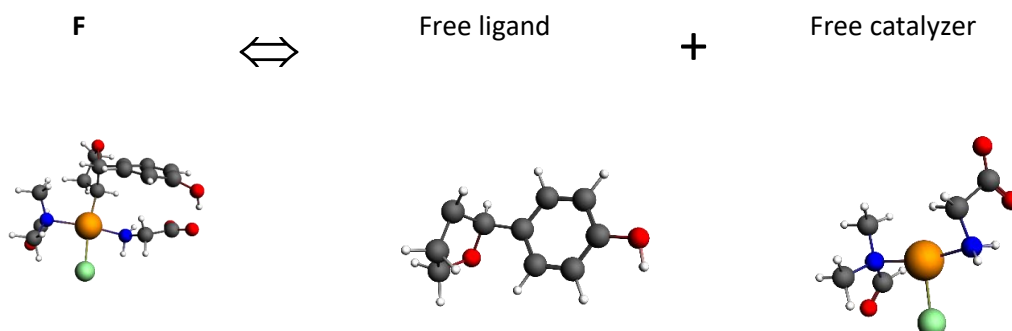

$$\Delta E = 114.37 \text{ (E(products) - E(reactants))}$$

Coordinates of F: full optimization at PBE0//TZDP level of theory:

Coordinates (Cartesian)

=====

| Atom  | bohr      |           |           | angstrom  |           |           | Geometric Variables   |    |    |
|-------|-----------|-----------|-----------|-----------|-----------|-----------|-----------------------|----|----|
|       | X         | Y         | Z         | X         | Y         | Z         | (0:frozen, *:LT par.) |    |    |
| 1 Pd  | -0.417837 | 0.418599  | -0.196029 | -0.221110 | 0.221513  | -0.103734 | 1                     | 2  | 3  |
| 2 C   | 3.823038  | -3.407330 | -1.077804 | 2.023065  | -1.803082 | -0.570349 | 4                     | 5  | 6  |
| 3 C   | 4.203491  | -6.193243 | -1.902162 | 2.224392  | -3.277323 | -1.006581 | 7                     | 8  | 9  |
| 4 N   | 1.273394  | -3.059516 | 0.003696  | 0.673851  | -1.619026 | 0.001956  | 10                    | 11 | 12 |
| 5 O   | 2.335356  | -7.591557 | -1.644652 | 1.235817  | -4.017279 | -0.870312 | 13                    | 14 | 15 |
| 6 O   | 6.342585  | -6.724995 | -2.771358 | 3.356351  | -3.558714 | -1.466540 | 16                    | 17 | 18 |
| 7 H   | 4.055801  | -2.203450 | -2.726410 | 2.146238  | -1.166015 | -1.442754 | 19                    | 20 | 21 |
| 8 H   | 1.404414  | -3.273252 | 1.907389  | 0.743184  | -1.732130 | 1.009347  | 22                    | 23 | 24 |
| 9 H   | 0.308992  | -4.612236 | -0.652976 | 0.163511  | -2.440690 | -0.345540 | 25                    | 26 | 27 |
| 10 Cl | 1.877586  | 1.080775  | 3.680861  | 0.993576  | 0.571922  | 1.947828  | 28                    | 29 | 30 |
| 11 H  | 5.242565  | -2.856069 | 0.305776  | 2.774246  | -1.511367 | 0.161810  | 31                    | 32 | 33 |
| 12 C  | 0.982732  | -0.940157 | -6.898661 | 0.520039  | -0.497510 | -3.650614 | 34                    | 35 | 36 |
| 13 C  | 3.166497  | 0.512004  | -6.973414 | 1.675638  | 0.270941  | -3.690172 | 37                    | 38 | 39 |
| 14 C  | 5.536117  | -0.603544 | -7.152603 | 2.929587  | -0.319382 | -3.784995 | 40                    | 41 | 42 |
| 15 C  | 5.739694  | -3.221258 | -7.236670 | 3.037315  | -1.704616 | -3.829481 | 43                    | 44 | 45 |
| 16 C  | 3.543993  | -4.658843 | -7.496357 | 1.875400  | -2.465354 | -3.966901 | 46                    | 47 | 48 |
| 17 C  | 1.204573  | -3.529412 | -7.302488 | 0.637433  | -1.867685 | -3.864310 | 49                    | 50 | 51 |
| 18 H  | 3.031569  | 2.546014  | -6.731814 | 1.604237  | 1.347293  | -3.562323 | 52                    | 53 | 54 |
| 19 H  | 7.244279  | 0.517487  | -7.015102 | 3.833508  | 0.273842  | -3.712232 | 55                    | 56 | 57 |
| 20 O  | 7.995218  | -4.369283 | -6.876269 | 4.230887  | -2.312125 | -3.638765 | 58                    | 59 | 60 |
| 21 H  | 3.714492  | -6.694480 | -7.615473 | 1.965624  | -3.542566 | -4.029935 | 61                    | 62 | 63 |
| 22 H  | -0.479878 | -4.695202 | -7.336175 | -0.253940 | -2.484594 | -3.882137 | 64                    | 65 | 66 |
| 23 H  | 7.683529  | -5.476638 | -5.379015 | 4.065949  | -2.898112 | -2.846452 | 67                    | 68 | 69 |
| 24 C  | -4.254067 | 3.549054  | 1.392460  | -2.251155 | 1.878078  | 0.736858  | 70                    | 71 | 72 |
| 25 C  | -0.469386 | 6.072080  | 1.424884  | -0.248389 | 3.213206  | 0.754016  | 73                    | 74 | 75 |
| 26 O  | -4.631105 | 4.034449  | 3.570170  | -2.450675 | 2.134939  | 1.889253  | 76                    | 77 | 78 |
| 27 H  | -5.591279 | 2.503908  | 0.194627  | -2.958777 | 1.325011  | 0.102992  | 79                    | 80 | 81 |

|      |           |           |           |           |           |           |     |     |     |
|------|-----------|-----------|-----------|-----------|-----------|-----------|-----|-----|-----|
| 28 H | -0.057917 | 5.310916  | 3.281163  | -0.030648 | 2.810416  | 1.736317  | 82  | 83  | 84  |
| 29 H | -1.449114 | 7.887033  | 1.582546  | -0.766838 | 4.173638  | 0.837447  | 85  | 86  | 87  |
| 30 H | 1.293453  | 6.307085  | 0.394305  | 0.684466  | 3.337566  | 0.208657  | 88  | 89  | 90  |
| 31 H | -0.963033 | 5.522478  | -3.559863 | -0.509615 | 2.922370  | -1.883798 | 91  | 92  | 93  |
| 32 H | -3.972245 | 4.084703  | -3.470210 | -2.102022 | 2.161532  | -1.836356 | 94  | 95  | 96  |
| 33 H | -3.564767 | 7.196533  | -2.251024 | -1.886393 | 3.808241  | -1.191191 | 97  | 98  | 99  |
| 34 N | -2.065732 | 4.285717  | 0.024349  | -1.093138 | 2.267904  | 0.012885  | 100 | 101 | 102 |
| 35 C | -2.690875 | 5.330571  | -2.464997 | -1.423950 | 2.820817  | -1.304420 | 103 | 104 | 105 |
| 36 O | -3.536010 | -0.448734 | -7.731501 | -1.871176 | -0.237460 | -4.091334 | 106 | 107 | 108 |
| 37 C | -1.480538 | 0.170739  | -6.045739 | -0.783467 | 0.090351  | -3.199267 | 109 | 110 | 111 |
| 38 C | -2.281268 | -0.827058 | -3.433875 | -1.207195 | -0.437660 | -1.817128 | 112 | 113 | 114 |
| 39 C | -5.159249 | -0.833143 | -3.625146 | -2.730157 | -0.440880 | -1.918345 | 115 | 116 | 117 |
| 40 C | -5.520987 | -1.616272 | -6.365958 | -2.921581 | -0.855294 | -3.368720 | 118 | 119 | 120 |
| 41 H | -6.037626 | -2.147867 | -2.300344 | -3.194974 | -1.136602 | -1.217289 | 121 | 122 | 123 |
| 42 H | -1.299239 | 2.231677  | -6.079314 | -0.687528 | 1.180953  | -3.217034 | 124 | 125 | 126 |
| 43 H | -7.314341 | -0.993757 | -7.185010 | -3.870582 | -0.525874 | -3.802143 | 127 | 128 | 129 |
| 44 H | -1.750219 | -2.823454 | -3.449500 | -0.926176 | -1.494107 | -1.825397 | 130 | 131 | 132 |
| 45 H | -6.028270 | 1.021911  | -3.340323 | -3.190023 | 0.540772  | -1.767623 | 133 | 134 | 135 |
| 46 H | -5.405489 | -3.680862 | -6.549091 | -2.860461 | -1.947828 | -3.465630 | 136 | 137 | 138 |

-----

Coordinates of free ligand: full optimization at PBE0//TZDP level of theory:

Coordinates (Cartesian)

=====

| Atom  | bohr      |           |           | angstrom  |           |           | Geometric Variables   |    |    |
|-------|-----------|-----------|-----------|-----------|-----------|-----------|-----------------------|----|----|
|       | X         | Y         | Z         | X         | Y         | Z         | (0:frozen, *:LT par.) |    |    |
| 1 H   | -6.013998 | -3.499287 | -7.111980 | -3.182471 | -1.851743 | -3.763498 | 1                     | 2  | 3  |
| 2 O   | -3.546909 | -0.663536 | -7.994989 | -1.876944 | -0.351128 | -4.230766 | 4                     | 5  | 6  |
| 3 C   | -1.5      |           |           |           |           |           |                       |    |    |
| 99528 | 0.532193  | -6.529669 | -0.846434 | 0.281624  | -3.455352 |           | 7                     | 8  | 9  |
| 4 C   | -2.540705 | 0.490129  | -3.821277 | -1.344483 | 0.259365  | -2.022133 | 10                    | 11 | 12 |
| 5 C   | -4.083890 | -1.901406 | -3.775021 | -2.161102 | -1.006181 | -1.997655 | 13                    | 14 | 15 |
| 6 C   | -5.387390 | -1.684929 | -6.318697 | -2.850884 | -0.891626 | -3.343710 | 16                    | 17 | 18 |
| 7 H   | -3.041670 | -3.744072 | -3.724765 | -1.609582 | -1.981277 | -1.971061 | 19                    | 20 | 21 |
| 8 H   | -1.319443 | 2.454737  | -7.286810 | -0.698219 | 1.298991  | -3.856014 | 22                    | 23 | 24 |
| 9 H   | -7.015685 | -0.402489 | -6.192759 | -3.712541 | -0.212988 | -3.277067 | 25                    | 26 | 27 |
| 10 H  | -1.009752 | 0.568889  | -2.434353 | -0.534338 | 0.301043  | -1.288204 | 28                    | 29 | 30 |
| 11 H  | -5.458178 | -1.963450 | -2.226136 | -2.888344 | -1.039013 | -1.178020 | 31                    | 32 | 33 |
| 12 C  | 0.856245  | -0.890456 | -6.843931 | 0.453105  | -0.471209 | -3.621652 | 34                    | 35 | 36 |
| 13 C  | 3.156531  | 0.345922  | -6.433105 | 1.670364  | 0.183054  | -3.404252 | 37                    | 38 | 39 |
| 14 C  | 5.447136  | -0.917218 | -6.446817 | 2.882500  | -0.485371 | -3.411509 | 40                    | 41 | 42 |
| 15 C  | 5.499080  | -3.501518 | -6.894331 | 2.909988  | -1.852923 | -3.648323 | 43                    | 44 | 45 |
| 16 C  | 3.256001  | -4.767103 | -7.370170 | 1.723001  | -2.522642 | -3.900126 | 46                    | 47 | 48 |
| 17 C  | 0.971819  | -3.475111 | -7.372617 | 0.514265  | -1.838949 | -3.901421 | 49                    | 50 | 51 |
| 18 H  | 3.134187  | 2.366969  | -6.073000 | 1.658540  | 1.252546  | -3.213693 | 52                    | 53 | 54 |

|      |           |           |           |           |           |           |    |    |    |
|------|-----------|-----------|-----------|-----------|-----------|-----------|----|----|----|
| 19 H | 7.210024  | 0.078996  | -6.127621 | 3.815380  | 0.041803  | -3.242597 | 55 | 56 | 57 |
| 20 O | 7.810096  | -4.715281 | -6.898504 | 4.132925  | -2.495219 | -3.650531 | 58 | 59 | 60 |
| 21 H | 3.294200  | -6.783080 | -7.779567 | 1.743216  | -3.589451 | -4.116769 | 61 | 62 | 63 |
| 22 H | -0.759408 | -4.464212 | -7.826155 | -0.401861 | -2.362359 | -4.141423 | 64 | 65 | 66 |
| 23 H | 7.502692  | -6.471084 | -7.222712 | 3.970254  | -3.424350 | -3.822094 | 67 | 68 | 69 |

Coordinates of free catalyzer: full optimization at PBE0//TZDP level of theory:

Coordinates (Cartesian)

=====

| Atom  | bohr      |           |           | angstrom  |           |           | Geometric Variables   |    |    |
|-------|-----------|-----------|-----------|-----------|-----------|-----------|-----------------------|----|----|
|       | X         | Y         | Z         | X         | Y         | Z         | (0:frozen, *:LT par.) |    |    |
| 1 C   | -4.178815 | 2.899382  | 0.794803  | -2.211334 | 1.534287  | 0.420592  | 1                     | 2  | 3  |
| 2 C   | -0.739579 | 5.743844  | -0.151848 | -0.391368 | 3.039512  | -0.080355 | 4                     | 5  | 6  |
| 3 O   | -4.991984 | 4.414490  | 2.232390  | -2.641644 | 2.336047  | 1.181330  | 7                     | 8  | 9  |
| 4 H   | -5.085596 | 1.079946  | 0.349408  | -2.691181 | 0.571483  | 0.184899  | 10                    | 11 | 12 |
| 5 H   | -0.377046 | 5.938162  | 1.859701  | -0.199524 | 3.142340  | 0.984111  | 13                    | 14 | 15 |
| 6 H   | -2.025861 | 7.237918  | -0.759083 | -1.072039 | 3.830141  | -0.401689 | 16                    | 17 | 18 |
| 7 H   | 1.023339  | 5.870242  | -1.201578 | 0.541528  | 3.106398  | -0.635848 | 19                    | 20 | 21 |
| 8 H   | -0.591580 | 2.858974  | -4.367621 | -0.313051 | 1.512904  | -2.311245 | 22                    | 23 | 24 |
| 9 H   | -3.270238 | 0.993786  | -3.606725 | -1.730535 | 0.525889  | -1.908596 | 25                    | 26 | 27 |
| 10 H  | -3.603371 | 4.307142  | -4.081056 | -1.906822 | 2.279241  | -2.159602 | 28                    | 29 | 30 |
| 11 N  | -1.868933 | 3.246525  | -0.621867 | -0.988997 | 1.717987  | -0.329078 | 31                    | 32 | 33 |
| 12 C  | -2.370073 | 2.826135  | -3.337057 | -1.254188 | 1.495526  | -1.765895 | 34                    | 35 | 36 |
| 13 Pd | 0.657966  | 0.323045  | 0.581774  | 0.348180  | 0.170948  | 0.307862  | 37                    | 38 | 39 |
| 14 Cl | -0.047933 | 1.085734  | 4.718985  | -0.025365 | 0.574546  | 2.497179  | 40                    | 41 | 42 |
| 15 C  | 3.415661  | -2.320213 | -1.775617 | 1.807490  | -1.227804 | -0.939616 | 43                    | 44 | 45 |
| 16 N  | 3.145996  | -2.458570 | 0.904605  | 1.664789  | -1.301019 | 0.478696  | 46                    | 47 | 48 |
| 17 H  | 4.708687  | -2.115510 | 1.954389  | 2.491730  | -1.119480 | 1.034218  | 49                    | 50 | 51 |
| 18 H  | 2.364931  | -4.238682 | 1.221468  | 1.251467  | -2.243014 | 0.646373  | 52                    | 53 | 54 |
| 19 H  | 5.122108  | -1.382692 | -2.425921 | 2.710503  | -0.731689 | -1.283742 | 55                    | 56 | 57 |
| 20 C  | 2.902412  | -5.131261 | -2.968566 | 1.535890  | -2.715347 | -1.570897 | 58                    | 59 | 60 |
| 21 O  | 1.907378  | -6.505535 | -1.364208 | 1.009341  | -3.442581 | -0.721908 | 61                    | 62 | 63 |
| 22 O  | 3.561636  | -5.326666 | -5.158980 | 1.884737  | -2.818750 | -2.730015 | 64                    | 65 | 66 |
| 23 H  | 1.704637  | -1.271375 | -2.592907 | 0.902055  | -0.672782 | -1.372107 | 67                    | 68 | 69 |

## References:

- [1] a) G. te Velde, F.M. Bickelhaupt, E.J. Baerends, C. Fonseca Guerra, S.J.A. van Gisbergen, J.G. Snijders and T. Ziegler, *J. Comput. Chem.* **2001**, 22, 931-967, b) C. Fonseca Guerra, J.G. Snijders, G. te Velde and E.J. Baerends, *Theor. Chem. Acc.* **1998**, 99, 391-403, c) ADF2014, SCM, Theoretical Chemistry, Vrije Universiteit, Amsterdam, The Netherlands, <http://www.scm.com>
